# Supplementary material for: Synthesis of chiral pyridine-oxazolines via a catalytic asymmetric Heine reaction of meso-N-(2-picolinoyl)-aziridines
Source: Royal Society of Chemistry journal article supplement (doi:10.1039/d1qo01900g), 2022-01-01

**Synthesis of Chiral Pyridine-oxazolines *via* Catalytic Asymmetric Heine Reaction  
of (*meso*)-N-(2-picolinoyl)-aziridines**

Yi Li, Wang-Yuren Li, Xiaoxue Tang, Xiaohua Liu\* and Xiaoming Feng\*

Key Laboratory of Green Chemistry & Technology, Ministry of Education, College  
of Chemistry, Sichuan University, Chengdu 610064, China

E-mail: liuxh@scu.edu.cn

xmfeng@scu.edu.cn

## Contents

|                                                                          |    |
|--------------------------------------------------------------------------|----|
| 1.General information.....                                               | 3  |
| 2.General procedure for <i>N,N'</i> -dioxide preparation.....            | 4  |
| 3.General procedure for the preparation of aziridine.....                | 4  |
| 4.General procedure for the catalytic Heine reaction.....                | 4  |
| 5.Experimental procedure for the gram-scale synthesis of 2a.....         | 5  |
| 6.The hydrosilylation of 1-(naphthalen-2-yl)ethenone 3.....              | 5  |
| 7.The conjugation addition reaction of nitroalkene and boronic acid..... | 7  |
| 8.Optimization of the reaction conditions.....                           | 8  |
| 9.The list of substrates scope.....                                      | 14 |
| 10.Unsuccessful substrate scope.....                                     | 14 |
| 11.Determination of absolute configurations of compounds.....            | 15 |
| 12.References.....                                                       | 19 |
| 13.Characterization of the products.....                                 | 20 |
| 14.NMR spectrum.....                                                     | 38 |

## 1. General information

Unless otherwise noted, all commercially available compounds were used as provided without further purification. Enantiomeric excess (e.e.) were determined by HPLC or UPC<sup>2</sup> analysis using the corresponding commercial chiral column as stated in the experimental procedures at 35 °C. Data for <sup>1</sup>H NMR are reported as follows: chemical shift in reference to residual CHCl<sub>3</sub> at 7.26 ppm (δ ppm), multiplicity (s = singlet, d = doublet, t = triplet, q = quartet, dd = doublet of doublets, td = triplet of doublets, m = multiplet), coupling constants (*J*) are in Hertz (Hz), and integration. Data for <sup>13</sup>C{<sup>1</sup>H} NMR are reported in terms of chemical shift in reference to the CDCl<sub>3</sub> solvent signal (77.1 ppm) and are reported relative to the solvent residual peaks. <sup>19</sup>F{<sup>1</sup>H} NMR spectra were collected on Bruker AMX-400 (376 MHz) with complete proton decoupling. HRMS was recorded on Thermo Scientific Q Exactive hybrid quadrupole-Orbitrap mass spectrometer (ESI Source). The chiral HPLC or UPC<sup>2</sup> methods were calibrated with the corresponding racemic mixtures. Optical rotations were measured on a Rudolph Autopol V automatic polarimeter and are reported as follows: [α]<sub>D</sub><sup>T</sup> (c g/100 mL, in solvent). IR spectra were recorded on Bruker TENSOR II IR spectrophotometer. All catalytic reactions were run in dried glassware. THF and toluene were distilled from sodium benzophenone ketyl. CHCl<sub>3</sub>, CH<sub>2</sub>Cl<sub>2</sub>, or CH<sub>2</sub>ClCH<sub>2</sub>Cl was distilled over CaH<sub>2</sub>.

## 2. General procedure for *N,N'*-dioxide preparation.

The following *N,N'*-dioxide ligands were synthesized by the same procedure in the literature.<sup>1</sup>

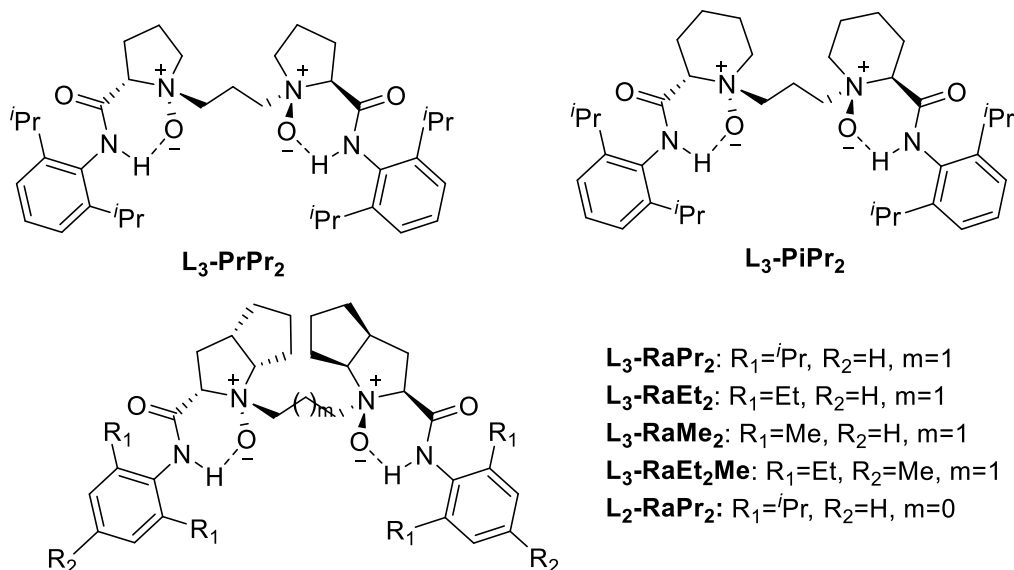

### 3.1 General procedure for the preparation of aziridine **1a**:<sup>2</sup>

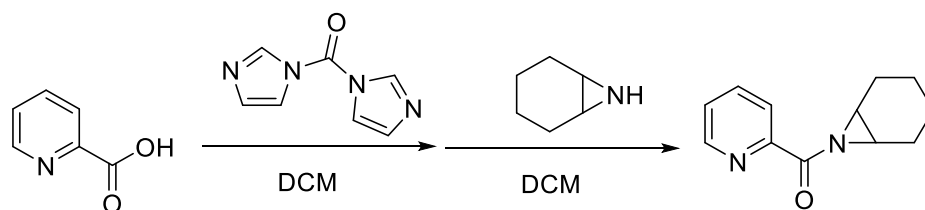

Acid (10 mmol) and di(1*H*-imidazol-1-yl)methanone (CDI) (1.62 g, 10 mmol) were dissolved in CH<sub>2</sub>Cl<sub>2</sub> (40 mL), and the mixture was refluxed for 3 h. After cooling to 0 °C, 7-azabicyclo[4.1.0]heptane (0.97 g, 10 mmol) in CH<sub>2</sub>Cl<sub>2</sub> (5 mL) was added slowly, then the reaction was stirred for 3 h at room temperature. Solvent was removed under reduced pressure, and the crude product was purified by flash column chromatography.

## 4. General procedure for the catalytic Henei reaction.

### 4.1 Preparation of the racemic products **2**:

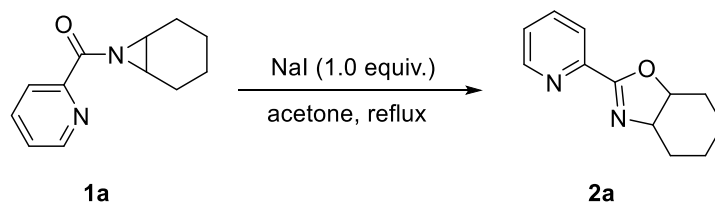

An oven-dried test tube was charged with NaI (0.1 mmol), **1a** (0.10 mmol), acetone (1.0 mL). The flask was equipped with a reflux condenser and heated to 70 °C. After stirring for 24 h, the reaction mixture was cooled to room temperature. The reaction mixture was subjected to flash column chromatography on silica gel and eluted with ethyl acetate to afford the corresponding product **2a** (colourless oil, 20.1 mg, 99% yield).

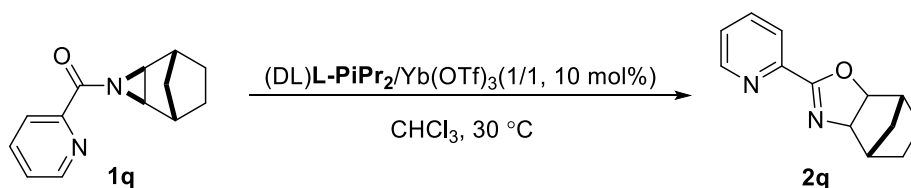

An oven-dried test tube was charged with the catalyst racemic **L-PrPr<sub>2</sub>**/Yb(OTf)<sub>3</sub> (1:1, 10 mol %), **1q** (0.10 mmol), CHCl<sub>3</sub> (1.0 mL) under N<sub>2</sub> atmosphere. The resulted solution was stirred at 30 °C for 48 h. The reaction mixture was subjected to flash column chromatography on silica gel and eluted with ethyl acetate to afford the corresponding product **2q** (white solide, 19.3 mg, 90% yield).

#### 4.2 Preparation of enantiomeric enriched product 2a:

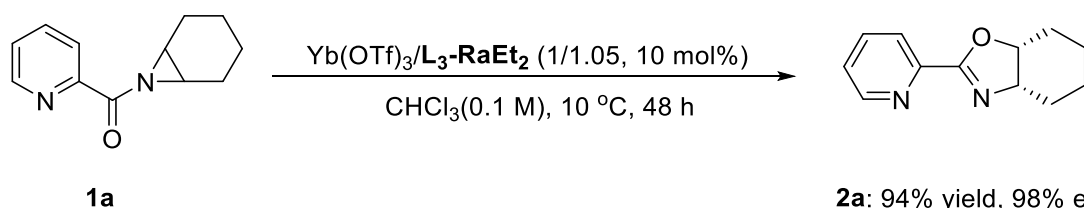

An oven-dried test tube was charged with the catalyst **L-RaEt<sub>2</sub>**/Yb(OTf)<sub>3</sub> (1.05:1, 10 mol %), **1a** (0.10 mmol), CHCl<sub>3</sub> (1.0 mL) under N<sub>2</sub> atmosphere. The resulted solution was stirred at 10 °C for 72 h. The reaction mixture was subjected to flash column chromatography on silica gel and eluted with ethyl acetate to afford the corresponding product **2a** (colourless oil, 19.0 mg, 94% yield, 98% ee).

#### 5. Experimental procedure for the gram-scale synthesis of 2a.

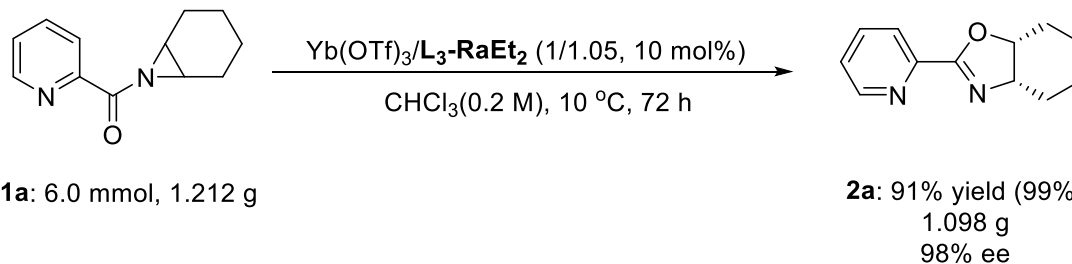

An oven-dried round-bottom flask was charged with the catalyst **L-RaEt<sub>2</sub>**/Yb(OTf)<sub>3</sub> (1:1.05, 10 mol %), **1a** (6.0 mmol, 1.212 g), CHCl<sub>3</sub> (30 mL) under N<sub>2</sub> atmosphere. The resulted solution was stirred at 10 °C for 72 h. The reaction mixture concentrated under reduced pressure and the crude product was subjected to flash column chromatography on silica gel and eluted with ethyl acetate to afford the corresponding product **2a** (1.098 g, 91% yield, 98% ee) and recovery **1a** (104 mg, 9% yield).

#### 6. The hydrosilylation of 1-(naphthalen-2-yl)ethenone .

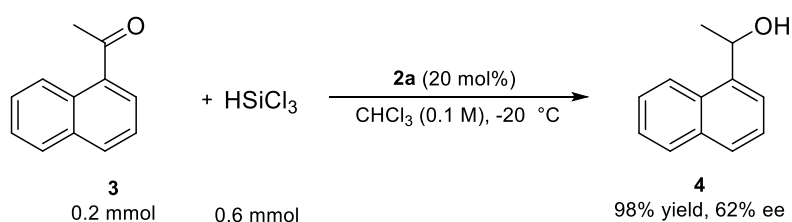

Trichlorosilane (60  $\mu$ L, 0.6 mmol, 3.0 equiv.) was slowly added dropwise to a solution of **2a** (8.1 mg, 0.04 mmol) and the ketone **3** (0.20 mmol, 1.0 equiv.) in  $\text{CHCl}_3$  (2.0 mL) at  $-20^\circ\text{C}$ . The reaction mixture was stirred at  $-20^\circ\text{C}$  for 24 h, then saturated aqueous  $\text{NaHCO}_3$  (1 mL) was added to quench the reaction. The mixture was extracted with  $\text{CH}_2\text{Cl}_2$  ( $3 \times 10$  mL) and the combined organic extracts were dried over  $\text{MgSO}_4$ . Concentration in vacuo followed by flash chromatography on silica gel with  $\text{CH}_2\text{Cl}_2$  afforded white solid **4**. The data of known compound **4** were consistent with those reported in literatures.<sup>3</sup>

### 1-(naphthalen-2-yl)ethan-1-ol

1-(naphthalen-1-yl)ethan-1-ol Following the typical procedure, white solid **4** was isolated in 98% yield (33.2 mg) and 62% ee.

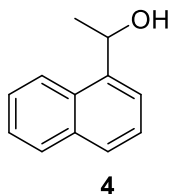

**UPC<sup>2</sup>** (chiral IB-3 column),  $\text{CO}_2/\text{MeOH} = 90/10$ , flow rate 1.5 mL/min,  $\lambda = 254$  nm, retention time:  $t$  (minor) = 3.9 min,  $t$  (major) = 3.6 min.

**<sup>1</sup>H NMR** (400 MHz, Chloroform-*d*).  $\delta$  7.90 – 7.68 (m, 4H), 7.46 (ddt,  $J = 10.7, 6.9, 3.3$  Hz, 3H), 5.02 (q,  $J = 6.4$  Hz, 1H),

1.55 (d,  $J = 6.5$  Hz, 3H).

**<sup>13</sup>C NMR** (100 MHz,  $\text{CDCl}_3$ ).  $\delta$  143.2, 133.3, 132.9, 128.3, 127.9, 127.7, 126.2, 125.8, 123.8, 123.8, 25.2.

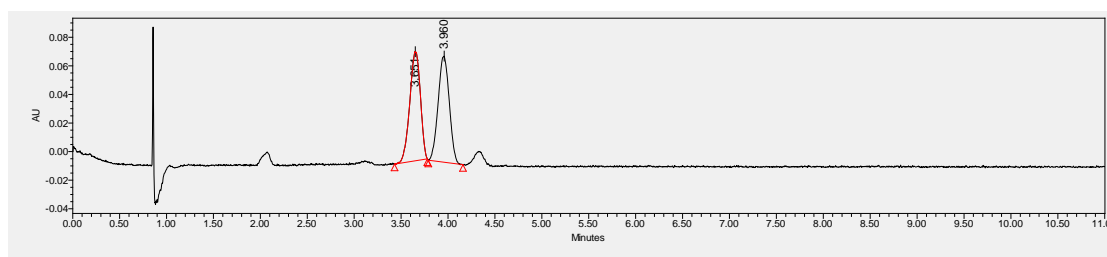

|   | Retention Time | Area   | % Area |
|---|----------------|--------|--------|
| 1 | 3.651          | 601357 | 49.52  |
| 2 | 3.960          | 613048 | 50.48  |

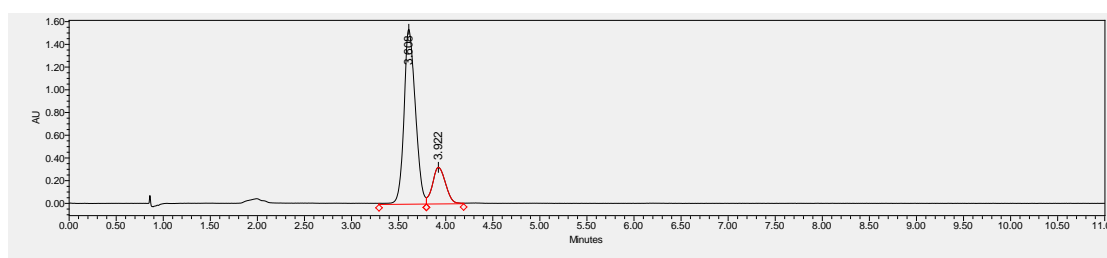

|   | Retention Time | Area     | % Area |
|---|----------------|----------|--------|
| 1 | 3.608          | 12977719 | 80.69  |
| 2 | 3.922          | 3106040  | 19.31  |

## 7. The conjugation addition reaction of nitroalken and boronic acid.

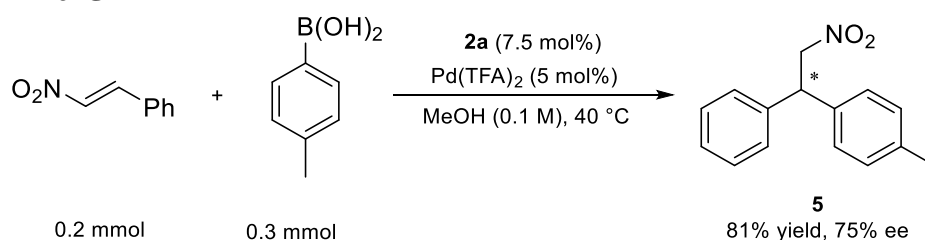

Pd(TFA)<sub>2</sub> (1.7 mg, 0.01 mmol, 5 mol%) and **2a** (1.5 mg, 0.015 mmol, 7.5 mol%) were weighed in air and placed in an oven-dried test tube. MeOH (0.5 mL, without special treatment) was added and the solution was stirred at room temperature for 0.5 h to afford the catalyst solution. Nitroalken (0.20 mmol, 1.0 equiv) and arylboronic acid (0.3 mmol, 1.5 equiv.) were added to the catalyst solution. The wall of the flask was rinsed with MeOH (0.5 mL). The tube was equipped with a reflux condenser and heated to 40 °C. After stirring for 24 h, the reaction mixture was cooled to room temperature, and the solvent was removed by rotary evaporation. The residue was purified by preparative TLC on silica gel (petroleum ether/EtOAc = 20/1) to give the product. The racemic products were prepared using 2,2'-bispyridine as ligand. The data of the known compound **5** were consistent with those reported in literatures.<sup>4</sup>

### 1-methyl-4-(2-nitro-1-phenylethyl)benzene

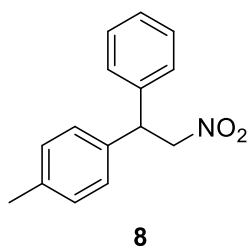

Following the typical procedure, **6** was isolated as oil in 81% yield (40.0 mg) and 75% ee.

**HPLC** (chiral ODH column), hexane/*i*-PrOH = 60/40, flow rate 0.7 mL/min,  $\lambda = 210$  nm, retention time: *t* (minor) = 26.2 min, *t* (major) = 27.8 min.

**<sup>1</sup>H NMR** (400 MHz, Chloroform-*d*).  $\delta$  7.35 – 7.28 (m, 2H), 7.23 (t, *J* = 8.4 Hz, 3H), 7.12 (s, 4H), 4.95 (d, *J* = 8.7 Hz, 2H), 4.90 – 4.81 (m, 1H),

2.30 (s, 3H).<sup>4</sup>

**<sup>13</sup>C NMR** (100 MHz, CDCl<sub>3</sub>).  $\delta$  139.4, 137.3, 136.2, 129.7, 129.0, 127.6, 79.3, 48.6, 21.0.<sup>4</sup>

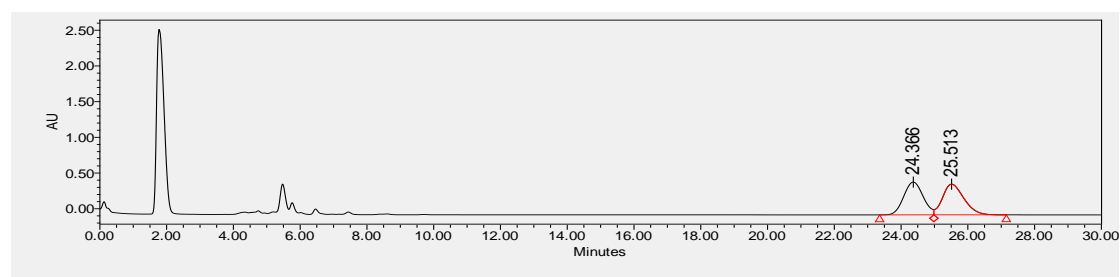

|   | Retention Time | Area     | % Area |
|---|----------------|----------|--------|
| 1 | 24.366         | 18516092 | 49.27  |
| 2 | 25.513         | 19065778 | 50.73  |

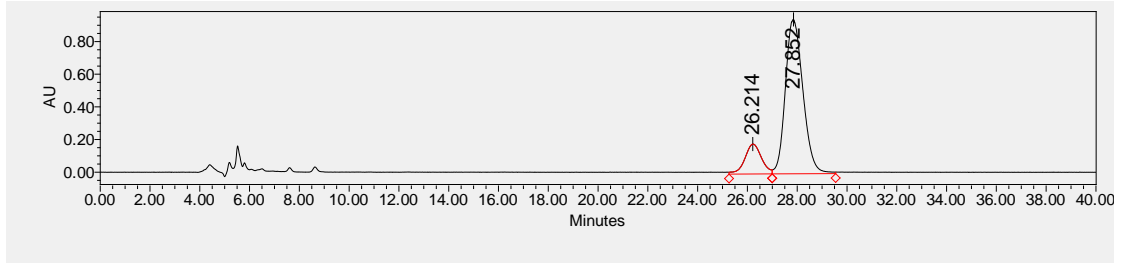

|   | Retention Time | Area     | % Area |
|---|----------------|----------|--------|
| 1 | 26.214         | 6223373  | 12.43  |
| 2 | 27.852         | 43853686 | 87.57  |



## 8. Optimization of the reaction conditions

**Table S1.** Screening of the classical Lewis acid catalysts.

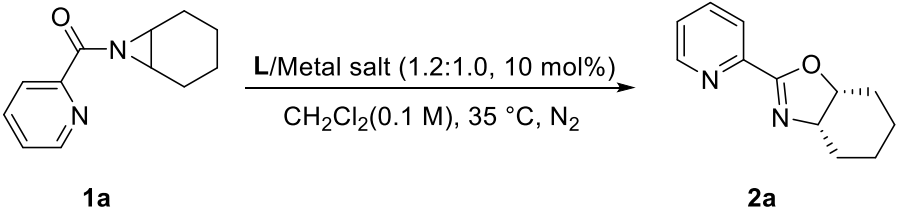

**1a**  $\xrightarrow[\text{CH}_2\text{Cl}_2(0.1 \text{ M}), 35 \text{ }^\circ\text{C}, \text{N}_2]{\text{L/Metal salt (1.2:1.0, 10 mol\%)}$  **2a**



**L1'** **L2'** **L3'**

| Entry <sup>a</sup> | L          | Metal salt           | Yield (%) | Ee (%) <sup>b</sup> |
|--------------------|------------|----------------------|-----------|---------------------|
| 1                  | <b>L1'</b> | Pd(OTf) <sub>2</sub> | Messy     | -                   |
| 2                  | <b>L2'</b> | Cu(OTf) <sub>2</sub> | 50        | 0                   |
| 3                  | <b>L3'</b> | Cu(OTf) <sub>2</sub> | 67        | 0                   |
| 4                  | <b>L3'</b> | Yb(OTf) <sub>3</sub> | 69        | 7                   |

<sup>a</sup>Unless otherwise noted, the reactions were carried out with **1a** (0.1 mmol), metal salt/L (1:1.2, 10 mol%) in CH<sub>2</sub>Cl<sub>2</sub> (0.1 M) at 35 °C under a N<sub>2</sub> atmosphere for 36 h. <sup>b</sup>Ee values were determined by UPC<sup>2</sup>.

**Table S2.** Screening of metal salts.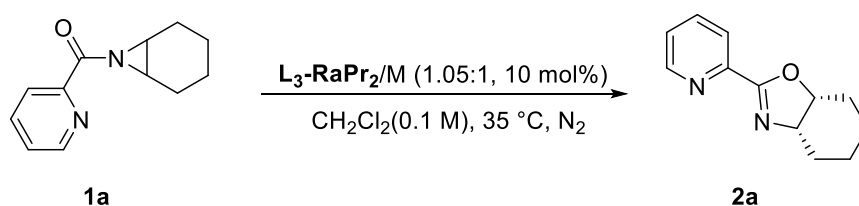

| Entry <sup>a</sup> | Metal salt           | Yield (%) | Ee (%) <sup>b</sup> |
|--------------------|----------------------|-----------|---------------------|
| 1                  | Y(OTf) <sub>3</sub>  | 98        | 76                  |
| 2                  | La(OTf) <sub>3</sub> | 60        | 33                  |
| 3                  | Yb(OTf) <sub>3</sub> | 93        | 48                  |
| 4                  | Mg(OTf) <sub>2</sub> | 16        | -37                 |
| 5                  | Fe(OTf) <sub>2</sub> | 73        | -6                  |
| 6                  | Co(OTf) <sub>2</sub> | messy     | -                   |
| 7                  | Ni(OTf) <sub>2</sub> | messy     | -                   |
| 8                  | Cu(OTf) <sub>2</sub> | messy     | -                   |
| 9                  | Sc(OTf) <sub>3</sub> | 54        | -36                 |

<sup>a</sup>Unless otherwise noted, the reactions were carried out with **1a** (0.1 mmol), metal salt/**L3-RaPr2** (1:1.05, 10 mol%) in  $\text{CH}_2\text{Cl}_2$  (0.1 M) at 35 °C under a  $\text{N}_2$  atmosphere for 36 h. <sup>b</sup>Ee values were determined by UPC<sup>2</sup>.

**Table S3.** Screening of solvents.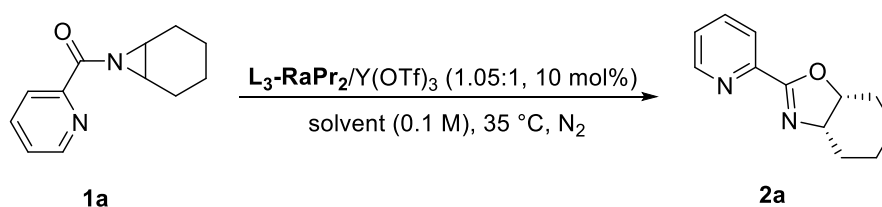

| Entry <sup>a</sup> | Solvent         | Yield (%) | Ee (%) <sup>b</sup> |
|--------------------|-----------------|-----------|---------------------|
| 1                  | THF             | 55        | 60                  |
| 2                  | PhMe            | 59        | 60                  |
| 3                  | DCE             | 72        | 72                  |
| 4                  | $\text{CHCl}_3$ | 80        | 88                  |

<sup>a</sup>Unless otherwise noted, the reactions were carried out with **1a** (0.1 mmol),  $\text{Y}(\text{OTf})_3$ /**L3-RaPr2** (1:1.05, 10 mol%) in solvent (0.1 M) at 35 °C for 36 h. <sup>b</sup>Ee values were determined by UPC<sup>2</sup>.

**Table S4.** Screening of chiral ligand.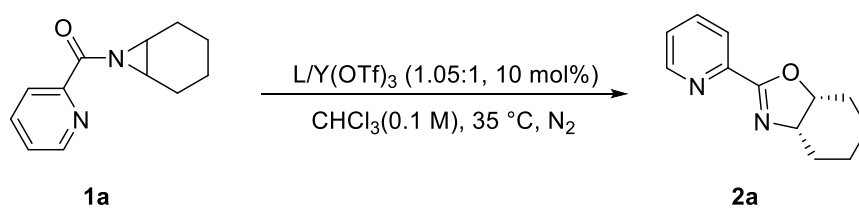

| Entry <sup>a</sup> | Ligand                                  | Yield (%) | Ee (%) <sup>b</sup> |
|--------------------|-----------------------------------------|-----------|---------------------|
| 1                  | <b>L<sub>3</sub>-PrPr<sub>2</sub></b>   | 84        | 89                  |
| 2                  | <b>L<sub>3</sub>-PiPr<sub>2</sub></b>   | 85        | 88                  |
| 3                  | <b>L<sub>3</sub>-RaPr<sub>2</sub></b>   | 80        | 88                  |
| 4                  | <b>L<sub>2</sub>-RaPr<sub>2</sub></b>   | 73        | 69                  |
| 6                  | <b>L<sub>3</sub>-RaMe<sub>2</sub></b>   | 85        | 90                  |
| 7                  | <b>L<sub>3</sub>-RaEt<sub>2</sub></b>   | 80        | 94                  |
| 8                  | <b>L<sub>3</sub>-RaEt<sub>2</sub>Me</b> | 80        | 87                  |

<sup>a</sup>Unless otherwise noted, the reactions were carried out with **1a** (0.1 mmol), Y(OTf)<sub>3</sub>/ligand (1:1.05, 10 mol%) in CHCl<sub>3</sub> (0.1 M) at 35 °C under a N<sub>2</sub> atmosphere for 36 h. <sup>b</sup>Ee values were determined by UPC<sup>2</sup>.

**Table S5.** Rescreening of metal salts.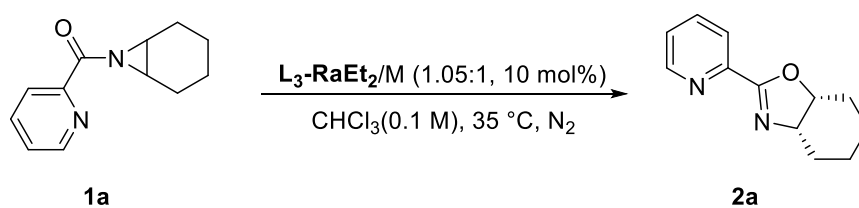

| Entry <sup>a</sup> | Metal salt           | Yield (%) | Ee (%) <sup>b</sup> |
|--------------------|----------------------|-----------|---------------------|
| 1                  | Y(OTf) <sub>3</sub>  | 85        | 94                  |
| 2                  | La(OTf) <sub>3</sub> | 37        | 19                  |
| 3                  | Ce(OTf) <sub>3</sub> | 49        | 68                  |
| 4                  | Pr(OTf) <sub>3</sub> | 87        | 85                  |
| 5                  | Nd(OTf) <sub>3</sub> | 95        | 92                  |
| 6                  | Sm(OTf) <sub>3</sub> | 97        | 85                  |
| 7                  | Eu(OTf) <sub>3</sub> | 97        | 92                  |
| 8                  | Gd(OTf) <sub>3</sub> | 97        | 93                  |
| 9                  | Tb(OTf) <sub>3</sub> | 97        | 94                  |
| 10                 | Dy(OTf) <sub>3</sub> | 95        | 93                  |
| 11                 | Ho(OTf) <sub>3</sub> | 94        | 94                  |
| 12                 | Er(OTf) <sub>3</sub> | 95        | 95                  |
| 13                 | Tm(OTf) <sub>3</sub> | 98        | 95                  |
| 14                 | Yb(OTf) <sub>3</sub> | 98        | 96                  |
| 15                 | Lu(OTf) <sub>3</sub> | 97        | 94                  |

<sup>a</sup>Unless otherwise noted, the reactions were carried out with **1a** (0.1 mmol), metal salt/**L3-RaEt2** (1:1.05, 10 mol%) in CHCl<sub>3</sub> (0.1 M) at 35 °C under a N<sub>2</sub> atmosphere for 36 h. <sup>b</sup>Ee values were determined by UPC<sup>2</sup>.

**Table S6.** Screening of temperature.

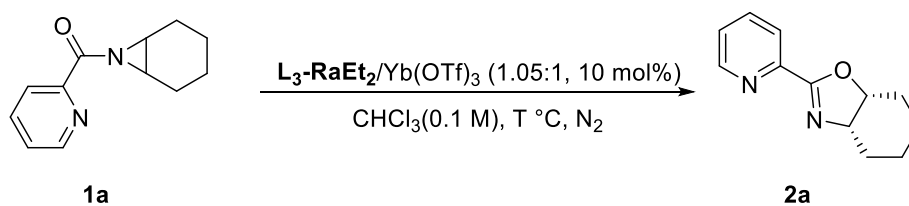

| Entry <sup>a</sup> | T (°C)    | Yield (%) | Ee (%) <sup>b</sup> |
|--------------------|-----------|-----------|---------------------|
| 1                  | 35        | 98        | 96                  |
| 2                  | 30        | 97        | 96                  |
| 3                  | 20        | 95        | 96                  |
| <b>4</b>           | <b>10</b> | <b>94</b> | <b>98</b>           |
| 5                  | 0         | 94        | 97                  |

<sup>a</sup>Unless otherwise noted, the reactions were carried out with **1a** (0.1 mmol), Yb(OTf)<sub>3</sub>/L<sub>3</sub>-RaEt<sub>2</sub> (1:1.05, 10 mol%) in CHCl<sub>3</sub> (0.1 M) at T °C under a N<sub>2</sub> atmosphere for 48 h. <sup>b</sup>Ee values were determined by UPC<sup>2</sup>.

## 9. The list of substrates scope.

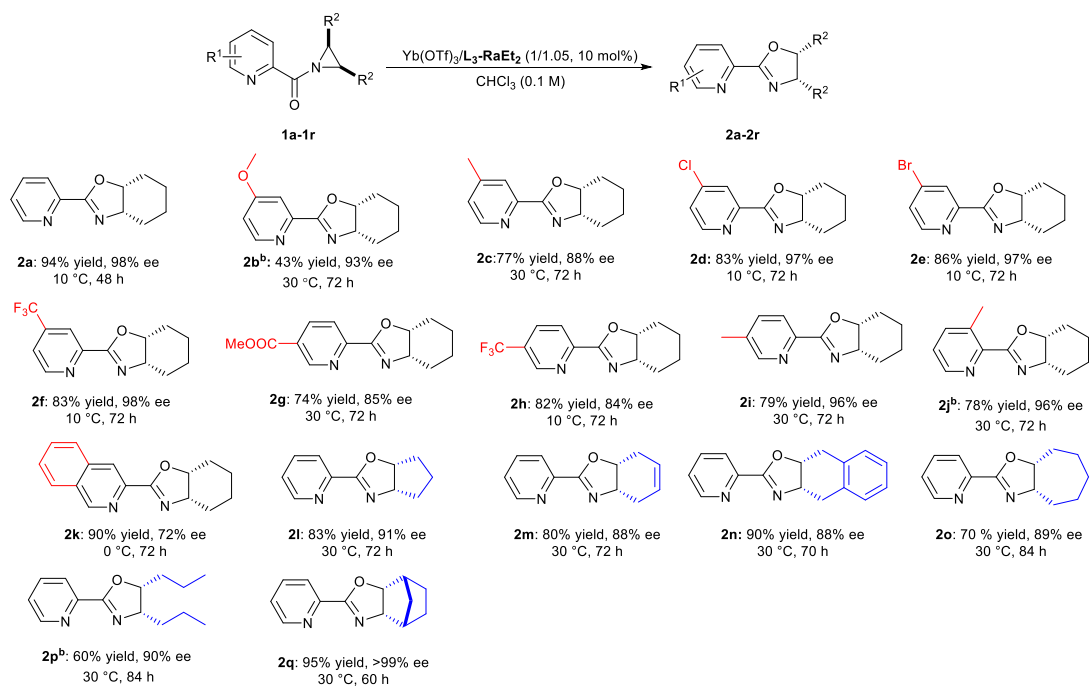

b: L<sub>3</sub>-PrEt<sub>2</sub> was used.

## 10. Unsuccessful substrate scope.

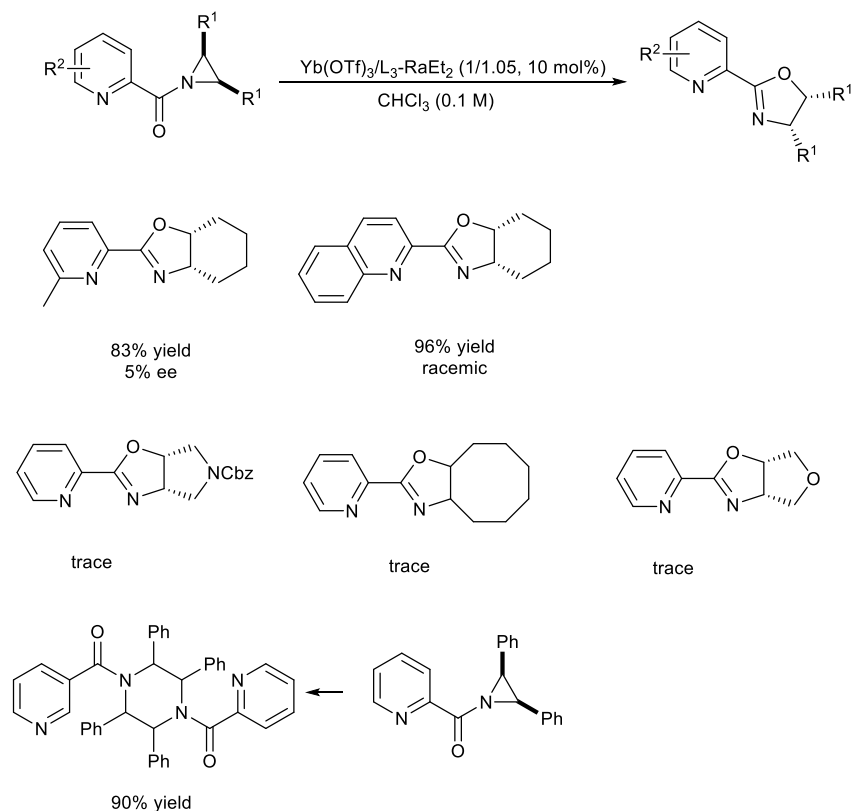

## 11. Determination of absolute configurations of the compounds.

Crystals suitable for the X-ray crystal structure analysis were obtained from a solution of compound **2a** and CuCl<sub>2</sub> in CHCl<sub>3</sub> (ca. 0.1 mL) and Et<sub>2</sub>O (0.3 mL) at r.t. The green crystal in block-shape, with approximate dimensions of 0.062 × 0.087 × 0.336 mm<sup>3</sup>, was selected and mounted for the single-crystal X-ray diffraction. The data set was collected by Bruker D8 Venture Photon II diffractometer at 173(2)K equipped with micro-focus Mo radiation source ( $K_{\alpha} = 0.71073\text{\AA}$ ). Applied with face-indexed numerical absorption correction, the structure solution was solved and refinement was processed by SHELXTL (version 6.14) and OLEX 2.3 program package, The structure was analyzed by ADDSYM routine implemented in PLATON suite and no higher symmetry was suggested. CCDC 2084388 contains the supplementary crystallographic data which can be obtained free of charge from The Cambridge Crystallographic Data Center via [www.ccdc.cam.ac.uk/data\\_request/cif](http://www.ccdc.cam.ac.uk/data_request/cif)

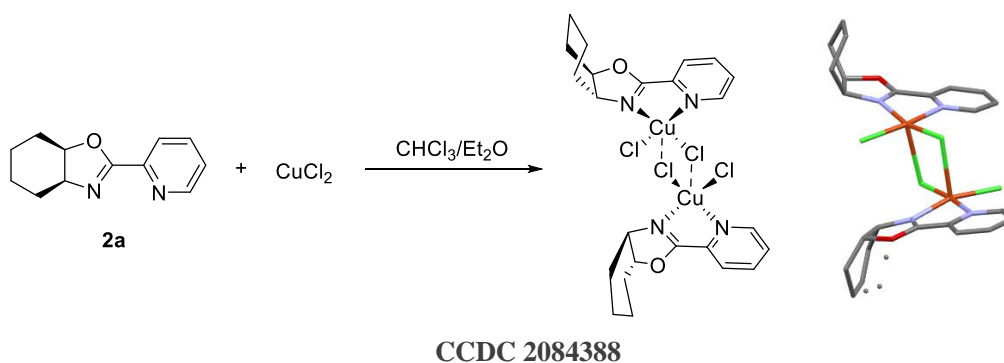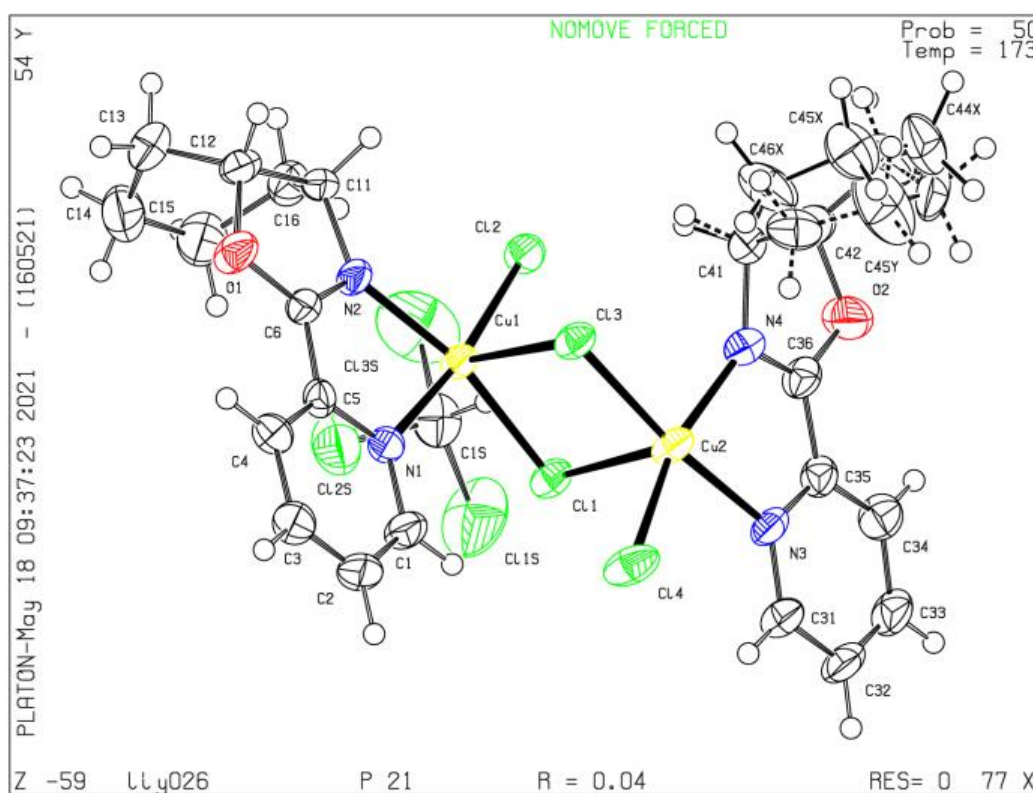

Crystallographic Data for C<sub>25</sub>H<sub>29</sub>Cl<sub>7</sub>Cu<sub>2</sub>N<sub>4</sub>O<sub>2</sub>

|                                                                                                                               |                                                                                               |
|-------------------------------------------------------------------------------------------------------------------------------|-----------------------------------------------------------------------------------------------|
| Formula                                                                                                                       | C <sub>25</sub> H <sub>29</sub> Cl <sub>7</sub> Cu <sub>2</sub> N <sub>4</sub> O <sub>2</sub> |
| Formula mass (amu)                                                                                                            | 792.75                                                                                        |
| Space group                                                                                                                   | P 2 <sub>1</sub>                                                                              |
| <i>a</i> (Å)                                                                                                                  | 11.4615(5)                                                                                    |
| <i>b</i> (Å)                                                                                                                  | 9.9184(4)                                                                                     |
| <i>c</i> (Å)                                                                                                                  | 14.1599(7)                                                                                    |
| <i>α</i> (deg)                                                                                                                | 90                                                                                            |
| <i>β</i> (deg)                                                                                                                | 104.423(2)                                                                                    |
| <i>γ</i> (deg)                                                                                                                | 90                                                                                            |
| <i>V</i> (Å <sup>3</sup> )                                                                                                    | 1558.96(12)                                                                                   |
| <i>Z</i>                                                                                                                      | 2                                                                                             |
| <i>λ</i> (Å)                                                                                                                  | 0.71073                                                                                       |
| <i>T</i> (K)                                                                                                                  | 173(2) K                                                                                      |
| <i>ρ</i> <sub>calcd</sub> (g cm <sup>-3</sup> )                                                                               | 1.689                                                                                         |
| <i>μ</i> (mm <sup>-1</sup> )                                                                                                  | 1.996                                                                                         |
| Transmission factors                                                                                                          | 0.731,0.957                                                                                   |
| 2 <i>θ</i> <sub>max</sub> (deg)                                                                                               | 28.342                                                                                        |
| No. of unique data, including <i>F</i> <sub>o</sub> <sup>2</sup> < 0                                                          | 7585                                                                                          |
| No. of unique data, with <i>F</i> <sub>o</sub> <sup>2</sup> > 2 <i>σ</i> ( <i>F</i> <sub>o</sub> <sup>2</sup> )               | 6103                                                                                          |
| No. of variables                                                                                                              | 389                                                                                           |
| <i>R</i> ( <i>F</i> ) for <i>F</i> <sub>o</sub> <sup>2</sup> > 2 <i>σ</i> ( <i>F</i> <sub>o</sub> <sup>2</sup> ) <sup>a</sup> | 0.0358                                                                                        |
| <i>R</i> <sub>w</sub> ( <i>F</i> <sub>o</sub> <sup>2</sup> ) <sup>b</sup>                                                     | 0.0847                                                                                        |
| Goodness of fit                                                                                                               | 1.117                                                                                         |

<sup>a</sup>  $R(F) = \sum ||F_o| - |F_c|| / \sum |F_o|$ .

<sup>b</sup>  $R_w(F_o^2) = [\sum [w(F_o^2 - F_c^2)^2] / \sum wF_o^4]^{1/2}$ ;  $w^{-1} = [\sigma^2(F_o^2) + (Ap)^2 + Bp]$ , where  $p = [\max(F_o^2, 0) + 2F_c^2] / 3$ .



Crystals suitable for the X-ray crystal structure analysis were obtained from a solution of optical pure (*S*)-*i*PrProx and CuCl<sub>2</sub> in CHCl<sub>3</sub> (ca. 0.1 mL) and Et<sub>2</sub>O (0.3 mL) at r.t. The green crystal in flake-shape, with approximate dimensions of 0.110 × 0.307 × 0.538 mm<sup>3</sup>, was selected and mounted for the single-crystal X-ray diffraction. The data set was collected by Bruker D8 Venture Photon II diffractometer at 173(2)K equipped with micro-focus Cu radiation source ( $K_{\alpha} = 1.54178\text{\AA}$ ). Applied with face-indexed numerical absorption correction, the structure solution was solved and refinement was processed by SHELXTL (version 6.14) and OLEX 2.3 program package, The value observed herein is indicative of racemic twinning and was accommodated during the refinement (using the SHELXL TWIN instruction). In this case, the relatively large standard uncertainty indicates that the structural data alone should not be used to confirm absolute stereochemistry, but should be used in conjunction with the established stereochemistry of the precursor compound. The structure was analyzed by ADDSYM routine implemented in PLATON suite and no higher symmetry was suggested. CCDC 2094394 contains the supplementary crystallographic data which can be obtained free of charge from The Cambridge Crystallographic Data Center via [www.ccdc.cam.ac.uk/data\\_request/cif](http://www.ccdc.cam.ac.uk/data_request/cif)

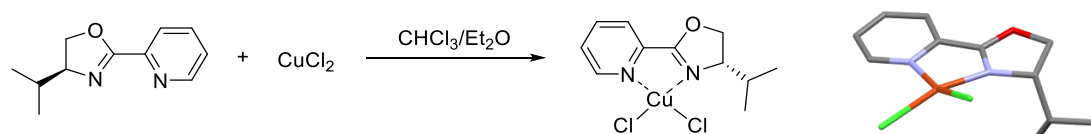

CCDC 2094394

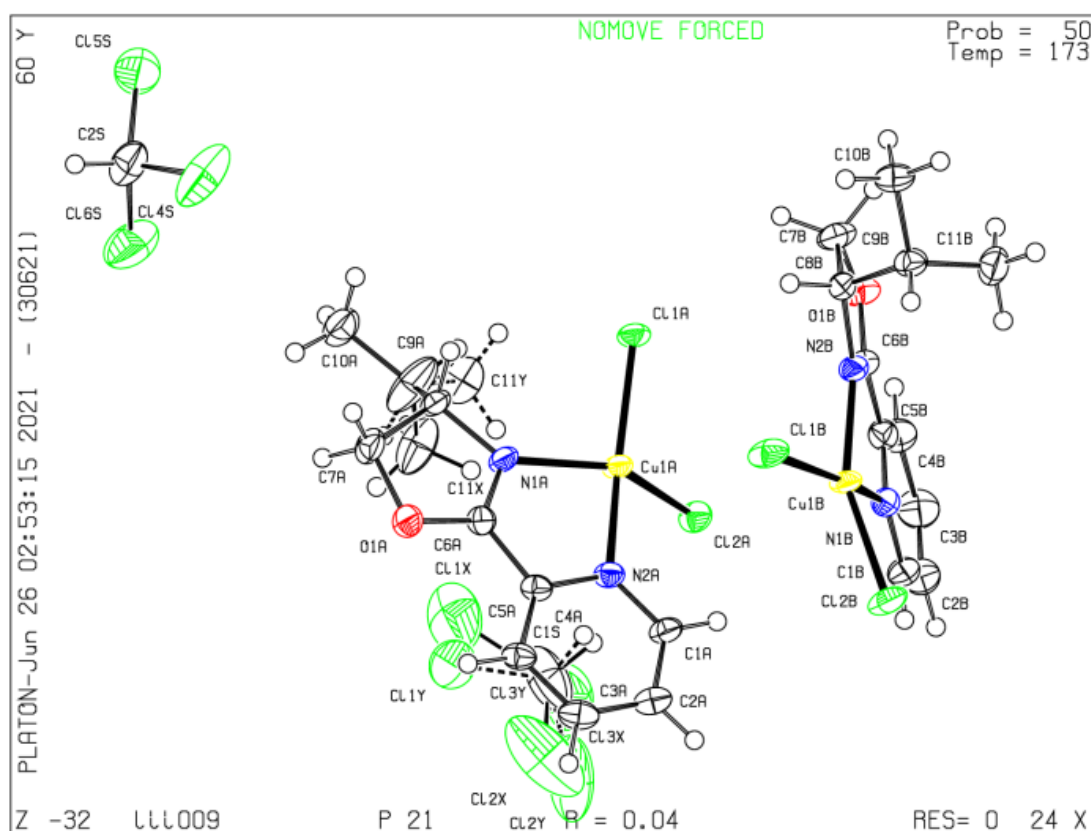

Crystallographic Data for C<sub>24</sub>H<sub>30</sub>Cl<sub>10</sub>Cu<sub>2</sub>N<sub>4</sub>O<sub>2</sub>.

|                                                   |                                                                                                  |
|---------------------------------------------------|--------------------------------------------------------------------------------------------------|
| Formula                                           | C <sub>24</sub> H <sub>30</sub> Cl <sub>10</sub> Cu <sub>2</sub> N <sub>4</sub> O <sub>2</sub> . |
| Formula mass (amu)                                | 888.10                                                                                           |
| Space group                                       | P 2 <sub>1</sub>                                                                                 |
| <i>a</i> (Å)                                      | 13.8291(4)                                                                                       |
| <i>b</i> (Å)                                      | 9.7078(3)                                                                                        |
| <i>c</i> (Å)                                      | 14.4138(4)                                                                                       |
| <i>α</i> (deg)                                    | 90                                                                                               |
| <i>β</i> (deg)                                    | 116.083(1)                                                                                       |
| <i>γ</i> (deg)                                    | 90                                                                                               |
| <i>V</i> (Å <sup>3</sup> )                        | 1737.98(9)                                                                                       |
| <i>Z</i>                                          | 2                                                                                                |
| <i>λ</i> (Å)                                      | 1.54178                                                                                          |
| <i>T</i> (K)                                      | 173(2) K                                                                                         |
| $\rho_{\text{calcd}}$ (g cm <sup>-3</sup> )       | 1.697                                                                                            |
| $\mu$ (mm <sup>-1</sup> )                         | 8.840                                                                                            |
| Transmission factors                              | 0.080,0.581                                                                                      |
| $2\theta_{\text{max}}$ (deg)                      | 74.533                                                                                           |
| No. of unique data, including $F_o^2 < 0$         | 6833                                                                                             |
| No. of unique data, with $F_o^2 > 2\sigma(F_o^2)$ | 6661                                                                                             |
| No. of variables                                  | 423                                                                                              |
| $R(F)$ for $F_o^2 > 2\sigma(F_o^2)$ <sup>a</sup>  | 0.0402                                                                                           |
| $R_w(F_o^2)$ <sup>b</sup>                         | 0.1037                                                                                           |
| Goodness of fit                                   | 1.063                                                                                            |

<sup>a</sup>  $R(F) = \sum ||F_o| - |F_c|| / \sum |F_o|$ .

<sup>b</sup>  $R_w(F_o^2) = [\sum [w(F_o^2 - F_c^2)^2] / \sum wF_o^4]^{1/2}$ ;  $w^{-1} = [\sigma^2(F_o^2) + (Ap)^2 + Bp]$ , where  $p = [\max(F_o^2, 0) + 2F_c^2] / 3$ .

## 12. References.

- 1): (a) Wen, Y. H.; Huang, X.; Huang, J. L.; Xiong, Y.; Qin, B.; Feng, X. M. *Synlett* **2005**, 2445. (b) Yu, Z. P.; Liu, X. H.; Dong, Z. H.; Xie, M. S.; Feng, X. M. *Angew. Chem. Int. Ed.* **2008**, *47*, 1308. (c) Zheng, K.; Qin, B.; Liu, X. H.; Feng, X. M. *J. Org. Chem.* **2007**, *72*, 8478. (d) Zhang, X.; Chen, D. H.; Liu, X. H.; Feng, X. M. *J. Org. Chem.* **2007**, *72*, 5227. (e) Zhou, X.; Shang, D. J.; Zhang, Q.; Lin, L. L.; Liu, X. H.; Feng, X. M. *Org. Lett.* **2009**, *11*, 1401.
- 2): Li, D.; Wang, L.-Q.; Zhu, H.-Y.; Bai, L.-T.; Yang, Y.-L.; Zhang, M.-M.; Yang, D.-X.; Wang, R. *Org. Lett.*, **2019**, *21*, 4717.
- 3): Malkov, A. V.; Liddon, A. J. P. S.; Ramírez-López, P.; Bendov, L.; D. Haigh, Kočovský, P. *Angew. Chem. Int. Ed.* **2006**, *45*, 1432.
- 4): He, Q.; Xie, F.; Fu, G.-H.; Quan, M.; Shen, C.-Ren; Yang, G.-Q.; Gridnev, I. D.; Zhang, W.-B. *Org. Lett.*, **2015**, *17*, 2250.

### 13. Characterization of the products.

#### 2a: (3aS,7aR)-2-(pyridin-2-yl)-3a,4,5,6,7,7a-hexahydrobenzo[d]oxazole

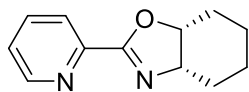

2a

Following the typical procedure, colourless oil **2a** was isolated in 94% yield (19.0 mg) and 98% ee.  $[\alpha]^{25}_D = -322.5$  ( $c = 0.4$  in  $\text{CH}_2\text{Cl}_2$ ).

**UPC<sup>2</sup>** (chiral OX-3 column),  $\text{CO}_2/\text{MeOH} = 93/7$ , flow rate 1.5 mL/min,  $\lambda = 254$  nm, retention time:  $t$  (minor) = 12.2 min,  $t$  (major) = 13.6 min.

**<sup>1</sup>H NMR** (400 MHz, Chloroform-*d*). 8.65 (d,  $J = 4.7$  Hz, 1H), 8.00 (d,  $J = 7.9$  Hz, 1H), 7.71 (td,  $J = 7.8, 1.8$  Hz, 1H), 7.35 – 7.28 (m, 1H), 4.72 (dt,  $J = 8.3, 5.2$  Hz, 1H), 4.18 – 4.07 (m, 1H), 2.03 – 1.74 (m, 4H), 1.57 – 1.45 (m, 3H), 1.43 – 1.31 (m, 2H).

**<sup>13</sup>C NMR** (100 MHz,  $\text{CDCl}_3$ ).  $\delta$  162.5, 148.7, 146.0, 135.5, 124.4, 122.7, 78.7, 62.7, 26.6, 25.0, 18.8, 18.0.

**ESI-HRMS**: calcd for  $\text{C}_{12}\text{H}_{15}\text{N}_2\text{O}^+$  ( $[\text{M} + \text{H}]^+$ ) = 203.1179, found 203.1171.

**IR** (neat): 2933, 2858, 1661, 1596, 1567, 1525, 1452, 1308, 1263, 1225, 1126, 1083, 1033  $\text{cm}^{-1}$ .

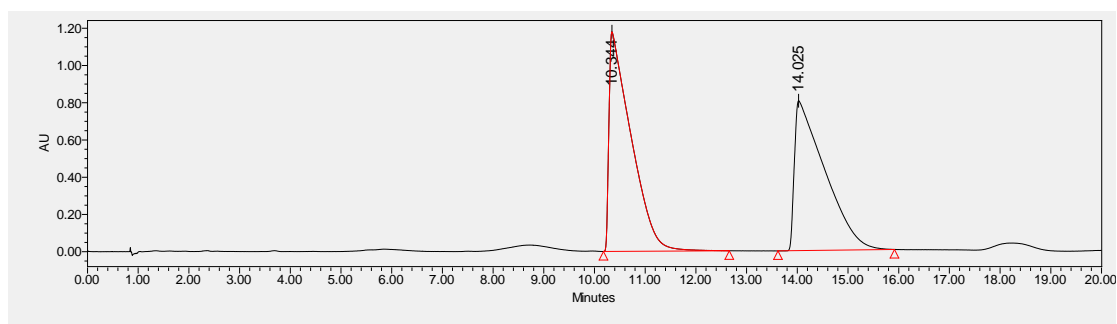

|   | Retention Time | Area     | % Area |
|---|----------------|----------|--------|
| 1 | 10.344         | 35468993 | 51.50  |
| 2 | 14.025         | 33403934 | 48.50  |

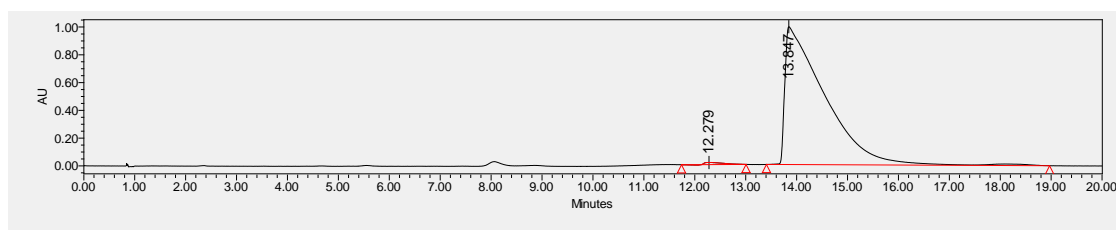

|   | Retention Time | Area     | % Area |
|---|----------------|----------|--------|
| 1 | 12.279         | 443383   | 0.81   |
| 2 | 13.847         | 54039714 | 99.19  |

**2b: (3aS,7aR)-2-(4-methoxyphenyl)-3a,4,5,6,7,7a-hexahydrobenzo[d]oxazole**

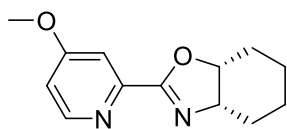

**2b**

Following the typical procedure, colourless oil **2b** was isolated in 43% yield (10.0 mg) and 93% ee.  $[\alpha]_D^{25} = -68.7$  ( $c = 0.29$  in  $\text{CH}_2\text{Cl}_2$ ).

**UPC<sup>2</sup>** (chiral OX-3 column),  $\text{CO}_2/\text{MeOH} = 90/10$ , flow rate 1.5 mL/min,  $\lambda = 254$  nm, retention time:  $t$  (minor) = 9.5 min,  $t$  (major) = 16.2 min.

**<sup>1</sup>H NMR** (400 MHz, Chloroform-*d*).  $\delta$  8.51 (d,  $J = 5.7$  Hz, 1H), 7.60 (d,  $J = 2.4$  Hz, 1H), 6.91 (dd,  $J = 5.6, 2.5$  Hz, 1H), 4.81 – 4.74 (m, 1H),

4.21 – 4.14 (m, 1H), 3.91 (s, 3H), 2.13 – 1.85 (m, 4H), 1.66 – 1.33 (m, 6H).

**<sup>13</sup>C NMR** (100 MHz,  $\text{CDCl}_3$ ).  $\delta$  166.1, 163.6, 150.8, 148.7, 112.5, 109.0, 79.8, 63.6, 55.4, 27.7, 25.9, 19.8, 19.0.

**ESI-HRMS**: calcd for  $\text{C}_{13}\text{H}_{17}\text{N}_2\text{O}_2^+$  ( $[\text{M} + \text{H}]^+$ ) = 233.1285, found 233.1285.

**IR** (neat): 2933, 2858, 1668, 1554, 1519, 1457, 1417, 1334, 1262, 1134, 1089, 978, 774, 690  $\text{cm}^{-1}$ .

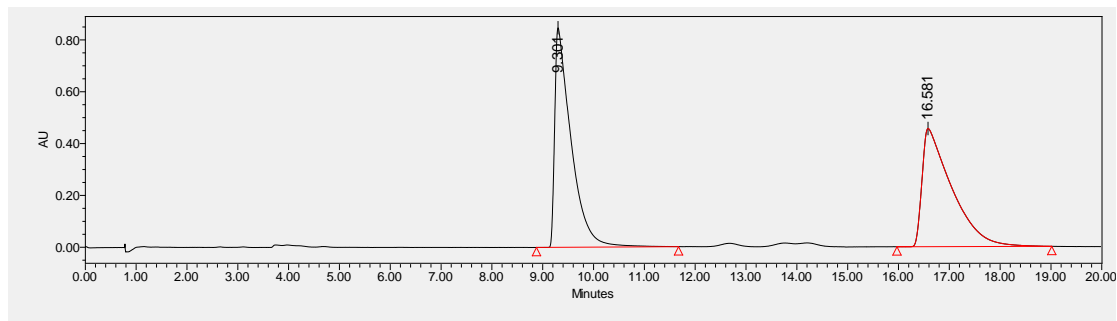

|   | Retention Time | Area     | % Area |
|---|----------------|----------|--------|
| 1 | 9.301          | 18951478 | 50.69  |
| 2 | 16.581         | 18437454 | 49.31  |

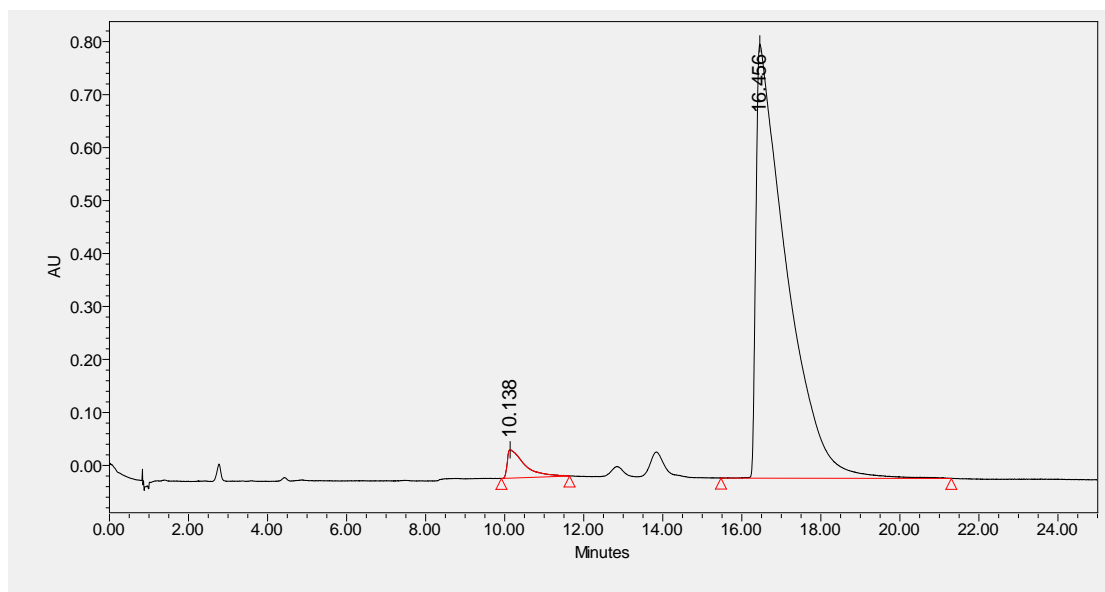

|   | Retention Time | Area     | % Area |
|---|----------------|----------|--------|
| 1 | 10.138         | 1629035  | 3.61   |
| 2 | 16.456         | 43461425 | 96.39  |

**2c: (3aS,7aR)-2-(4-methylpyridin-2-yl)-3a,4,5,6,7,7a-hexahydrobenzo[d]oxazole**

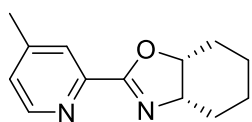

**2c**

Following the typical procedure, colourless oil **2c** was isolated in 77% yield (16.5 mg) and 88% ee.  $[\alpha]^{25}_D = -142.1$  ( $c = 0.204$  in  $\text{CH}_2\text{Cl}_2$ ).

**UPC<sup>2</sup>** (chiral OX-3 column),  $\text{CO}_2/\text{MeOH} = 93/7$ , flow rate 1.5 mL/min,  $\lambda = 254$  nm, retention time:  $t$  (minor) = 6.8 min,  $t$  (major) = 10.3 min.

**<sup>1</sup>H NMR** (400 MHz, Chloroform-*d*).  $\delta$  8.49 (d,  $J = 5.0$  Hz, 1H), 7.83 (s, 1H), 7.14 (d,  $J = 5.8$  Hz, 1H), 4.71 (dt,  $J = 8.2, 5.1$  Hz, 1H), 4.19 – 3.99 (m, 1H), 2.33 (s, 3H), 2.03 – 1.69 (m, 4H), 1.58 – 1.24 (m, 4H).

**<sup>13</sup>C NMR** (100 MHz,  $\text{CDCl}_3$ ).  $\delta$  163.9, 149.5, 148.1, 146.7, 126.5, 124.5, 79.8, 63.5, 27.6, 26.0, 21.0, 19.8, 19.0.

**ESI-HRMS**: calcd for  $\text{C}_{13}\text{H}_{17}\text{N}_2\text{O}^+$  ( $[\text{M} + \text{H}]^+$ ) = 217.1335, found 217.1331.

**IR** (neat): 2936, 1862, 1725, 1660, 1601, 1524, 1448, 1282, 1204, 1156, 1127, 1032  $\text{cm}^{-1}$ .

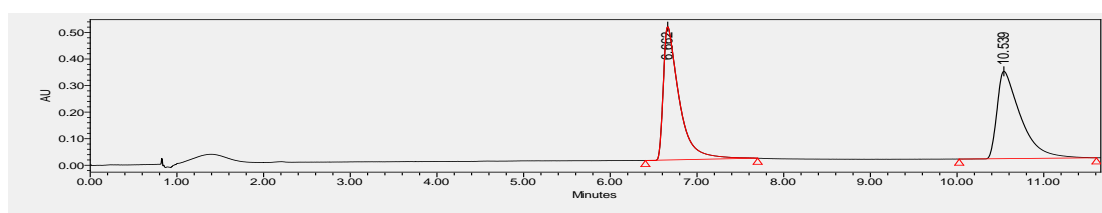

|   | Retention Time | Area    | % Area |
|---|----------------|---------|--------|
| 1 | 6.662          | 6376477 | 50.74  |
| 2 | 10.539         | 6190121 | 49.26  |

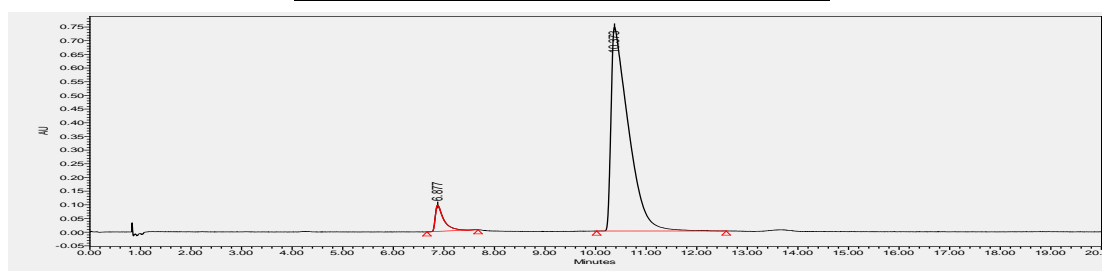

|   | Retention Time | Area     | % Area |
|---|----------------|----------|--------|
| 1 | 6.877          | 1117065  | 5.90   |
| 2 | 10.373         | 17816493 | 94.10  |

**2d: (3aS,7aR)-2-(4-chloropyridin-2-yl)-3a,4,5,6,7,7a-hexahydrobenzo[d]oxazole**

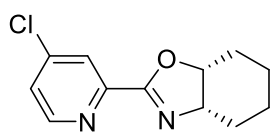

**2d**

Following the typical procedure, colourless oil **2d** was isolated in 83% yield (19.5 mg) and 97% ee.  $[\alpha]_D^{25} = -163.1$  ( $c = 0.178$  in  $\text{CH}_2\text{Cl}_2$ ).

**UPC<sup>2</sup>** (chiral OX-3 column),  $\text{CO}_2/\text{MeOH} = 93/7$ , flow rate 1.5 mL/min,  $\lambda = 254$  nm, retention time:  $t$  (minor) = 7.3 min,  $t$  (major) = 8.2 min.

**<sup>1</sup>H NMR** (400 MHz, Chloroform-*d*).  $\delta$  8.45 (d,  $J = 5.2$  Hz, 1H), 8.19 (d,  $J = 1.6$  Hz, 1H), 7.53 – 7.46 (m, 1H), 4.78 – 4.67 (m, 1H), 4.19 – 4.08

(m, 1H), 2.01 – 1.74 (m, 3H), 1.62 – 1.45 (m, 3H), 1.44 – 1.29 (m, 2H).

**<sup>13</sup>C NMR** (100 MHz,  $\text{CDCl}_3$ ).  $\delta$  162.4, 150.3, 148.3, 133.3, 128.6, 127.0, 80.0, 63.8, 27.6, 26.0, 19.8, 18.9.

**ESI-HRMS**: calcd for  $\text{C}_{12}\text{H}_{14}\text{ClN}_2\text{O}^+$  ( $[\text{M} + \text{H}]^+$ ) = 237.0789 and 239.0760, found 237.0781 and 239.0750.

**IR** (neat): 2933, 2858, 1668, 1554, 1519, 1457, 1417, 1334, 1262, 1134, 1089, 978  $\text{cm}^{-1}$ .

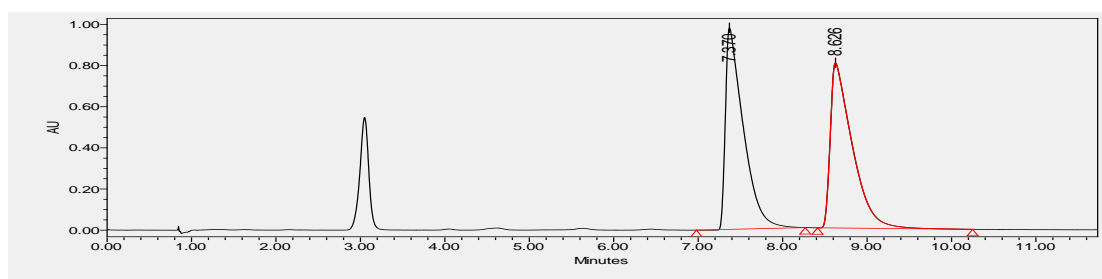

|   | Retention Time | % Area | Height |
|---|----------------|--------|--------|
| 1 | 7.370          | 50.02  | 979976 |
| 2 | 8.626          | 49.98  | 803007 |

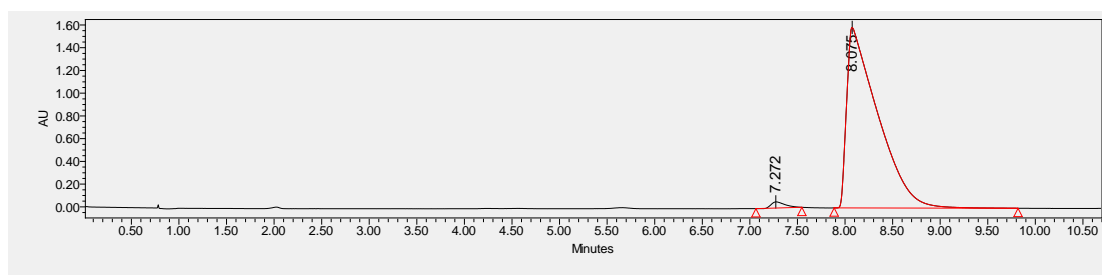

|   | Retention Time | Area     | % Area |
|---|----------------|----------|--------|
| 1 | 7.272          | 551750   | 1.51   |
| 2 | 8.075          | 36014687 | 98.49  |

**2e: (3a*S*,7a*R*)-2-(4-bromopyridin-2-yl)-3a,4,5,6,7,7a-hexahydrobenzo[d]oxazole**

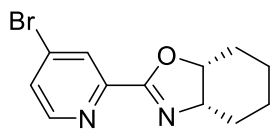

**2e**

Following the typical procedure, colourless oil **2e** was isolated in 86% yield (24.4 mg) and 97% ee.  $[\alpha]^{25}_D = -137.2$  ( $c = 0.182$  in  $\text{CH}_2\text{Cl}_2$ ).

**UPC<sup>2</sup>** (chiral OX-3 column),  $\text{CO}_2/\text{MeOH} = 93/7$ , flow rate 1.5 mL/min,  $\lambda = 254$  nm, retention time:  $t$  (minor) = 9.5 min,  $t$  (major) = 10.4 min.

**<sup>1</sup>H NMR** (400 MHz, Chloroform-*d*).  $\delta$  8.54 (d,  $J = 5.3$  Hz, 1H), 8.02 (d,  $J = 2.0$  Hz, 1H), 7.33 (dd,  $J = 5.3, 2.0$  Hz, 1H), 4.73 (dt,  $J = 8.3, 5.2$  Hz, 1H), 4.25 – 4.08 (m, 1H), 2.02 – 1.75 (m, 3H), 1.62 – 1.45 (m, 3H), 1.44 – 1.30 (m, 2H).

**<sup>13</sup>C NMR** (100 MHz,  $\text{CDCl}_3$ ).  $\delta$  162.6, 150.5, 148.5, 144.8, 125.6, 124.1, 80.0, 63.8, 27.5, 26.0, 19.8, 18.9.

**ESI-HRMS**: calcd for  $\text{C}_{12}\text{H}_{14}\text{BrN}_2\text{O}^+$  ( $[\text{M} + \text{H}]^+$ ) = 281.0284 and 283.0264, found 281.0274 and 283.0251.

**IR** (neat): 2932, 2857, 1659, 1570, 1551, 1518, 1459, 1412, 1132, 1085, 985, 972, 749, 721, 679  $\text{cm}^{-1}$ .

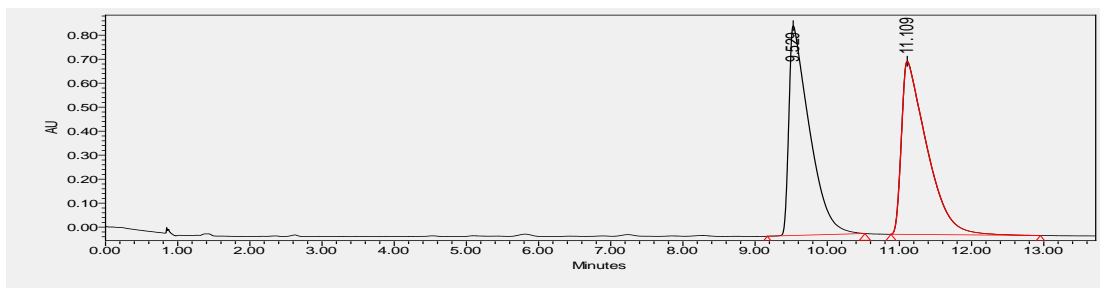

|   | Retention Time | Area     | % Area |
|---|----------------|----------|--------|
| 1 | 9.529          | 17156592 | 49.43  |
| 2 | 11.109         | 17553648 | 50.57  |

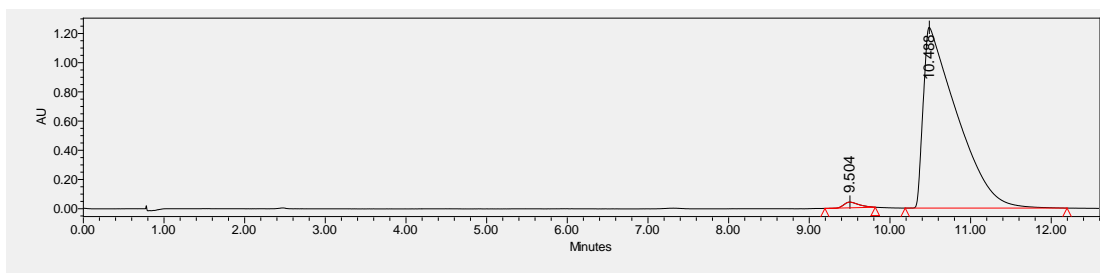

|   | Retention Time | Area     | % Area |
|---|----------------|----------|--------|
| 1 | 9.504          | 505145   | 1.39   |
| 2 | 10.488         | 35919549 | 98.61  |



**2f: (3aS,7aR)-2-(4-(trifluoromethyl)pyridin-2-yl)-3a,4,5,6,7,7a-hexahydrobenzo[d]oxazole**

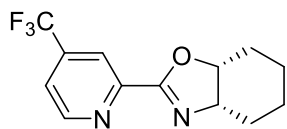

**2f**

Following the typical procedure, colourless oil **2f** was isolated in 83% yield (22.4 mg) and 98% ee.  $[\alpha]^{25}_D = -89.8$  ( $c = 0.364$  in  $\text{CH}_2\text{Cl}_2$ ).

**UPC<sup>2</sup>** (chiral OX-3 column),  $\text{CO}_2/\text{MeOH} = 90/10$ , flow rate 1.5 mL/min,  $\lambda = 254$  nm, retention time:  $t$  (minor) = 5.1 min,  $t$  (major) = 6.1 min.

**<sup>1</sup>H NMR** (400 MHz, Chloroform-*d*). 8.83 (d,  $J = 5.0$  Hz, 1H), 8.24 (s, 1H), 7.54 (d,  $J = 6.0$  Hz, 1H), 4.76 (dt,  $J = 8.3, 5.2$  Hz, 1H), 4.23 – 4.12

(m, 1H), 2.09 – 1.74 (m, 3H), 1.64 – 1.47 (m, 3H), 1.45 – 1.26 (m, 2H).

**<sup>13</sup>C NMR** (100 MHz,  $\text{CDCl}_3$ ).  $\delta$  162.5, 150.7, 139.3(d,  $J = 34.3$  Hz), 123.8(d,  $J = 269.6$  Hz), 120.9(d,  $J = 3.5$  Hz), 119.6(d,  $J = 3.5$  Hz), 80.2, 63.9, 27.5, 26.0, 19.8, 18.9.

**<sup>19</sup>F NMR** (376 MHz, Chloroform-*d*)  $\delta$  -64.81.

**ESI-HRMS**: calcd for  $\text{C}_{13}\text{H}_{14}\text{F}_3\text{N}_2\text{O}^+$  ( $[\text{M} + \text{H}]^+$ ) = 271.1053, found 271.1042.

**IR** (neat): 2938, 2861, 1677, 1528, 1408, 1331, 1318, 1140, 971, 854  $\text{cm}^{-1}$ .

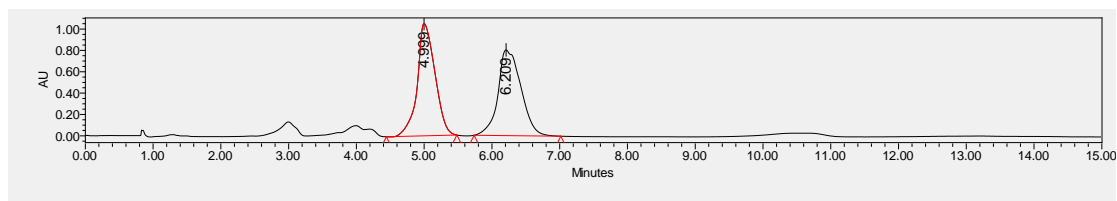

|   | Retention Time | Area     | % Area |
|---|----------------|----------|--------|
| 1 | 4.999          | 19128546 | 50.24  |
| 2 | 6.209          | 18947877 | 49.76  |

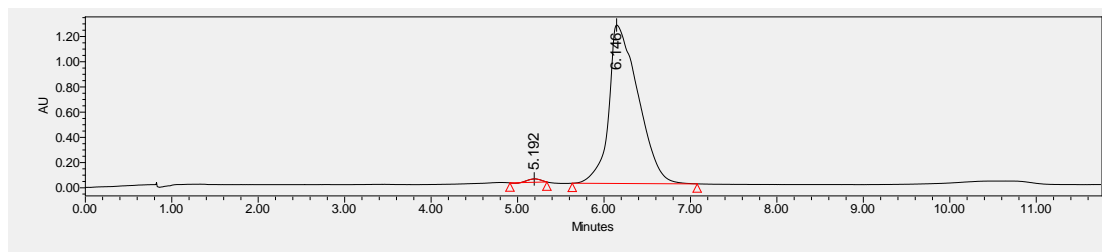

|   | Retention Time | Area     | % Area |
|---|----------------|----------|--------|
| 1 | 5.192          | 303635   | 1.01   |
| 2 | 6.146          | 29684831 | 98.99  |

**2g: methyl 6-((3aS,7aR)-3a,4,5,6,7,7a-hexahydrobenzo[d]oxazol-2-yl)nicotinate**

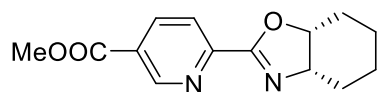

**2g**

Following the typical procedure, white solid **2g** was isolated in 74% yield (19.3 mg) and 85% ee.  $[\alpha]^{25}_D = -126.3$  ( $c = 0.340$  in  $\text{CH}_2\text{Cl}_2$ ). M.p.: 103 – 105 °C.

**UPC<sup>2</sup>** (chiral OX-3 column),  $\text{CO}_2/\text{MeOH} = 96/4$ , flow rate 1.5 mL/min,  $\lambda = 254$  nm, retention time:  $t$  (minor) = 26.9 min,  $t$

(major) = 29.2 min.

**<sup>1</sup>H NMR** (400 MHz, Chloroform-*d*).  $\delta$  9.28 (s, 1H), 8.38 (d,  $J = 8.2$  Hz, 1H), 8.15 (d,  $J = 8.2$  Hz, 1H), 4.90 – 4.73 (m, 1H), 4.23 (m, 1H), 3.98 (s, 3H), 2.10 – 1.95 (m, 2H), 1.72 – 1.33 (m, 6H).

**<sup>13</sup>C NMR** (100 MHz,  $\text{CDCl}_3$ ).  $\delta$  165.2, 162.9, 150.7, 150.3, 137.7, 127.2, 123.2, 80.0, 63.9, 52.6, 27.6, 26.0, 19.8, 19.0.

**ESI-HRMS**: calcd for  $\text{C}_{14}\text{H}_{17}\text{N}_2\text{O}_3^+$  ( $[\text{M} + \text{H}]^+$ ) = 261.1234, found 261.1226.

**IR** (neat): 2935, 2857, 1720, 1675, 1636, 1595, 1523, 1437, 1391, 1279, 1194, 1116, 1083, 1019  $\text{cm}^{-1}$ .

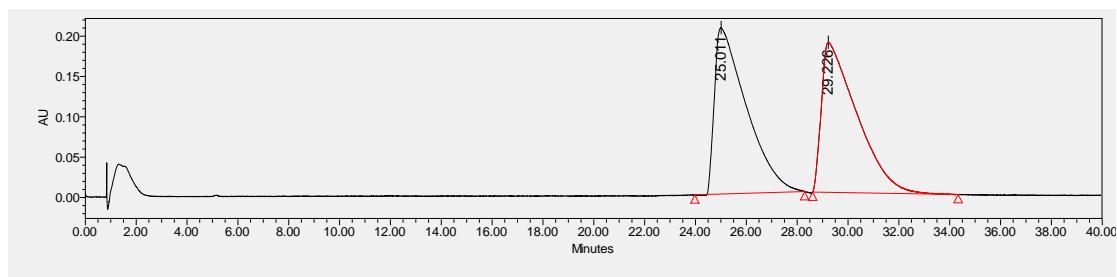

|   | Retention Time | Area     | % Area |
|---|----------------|----------|--------|
| 1 | 25.011         | 17971727 | 50.05  |
| 2 | 29.226         | 17935448 | 49.95  |

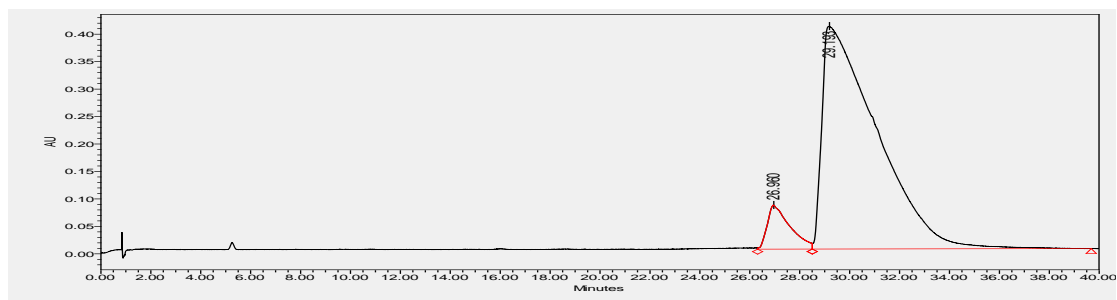

|   | Retention Time | Area     | % Area |
|---|----------------|----------|--------|
| 1 | 26.960         | 5035789  | 7.55   |
| 2 | 29.193         | 61643822 | 92.45  |

**2h: (3aS,7aR)-2-(5-(trifluoromethyl)pyridin-2-yl)-3a,4,5,6,7,7a-hexahydrobenzo[d]oxazole**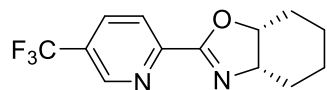**2h**

Following the typical procedure, colourless oil **2h** was isolated in 82% yield (22.0 mg) and 84% ee.  $[\alpha]_D^{25} = -97.4$  ( $c = 0.530$  in  $\text{CH}_2\text{Cl}_2$ ).

**UPC<sup>2</sup>** (chiral AD-3 column),  $\text{CO}_2/\text{MeOH} = 90/10$ , flow rate 1.5 mL/min,  $\lambda = 254$  nm, retention time:  $t$  (minor) = 2.0 min,  $t$  (major)

= 2.5 min.

**<sup>1</sup>H NMR** (400 MHz, Chloroform-*d*).  $\delta$  9.01 – 8.89 (m, 1H), 8.21 (d,  $J = 8.2$  Hz, 1H), 8.03 (dd,  $J = 8.3$ , 1.8 Hz, 1H), 4.83 (dt,  $J = 8.3$ , 5.2 Hz, 1H), 4.31 – 4.18 (m, 1H), 4.28 – 4.20 (m, 3H), 2.05 – 1.85 (m, 3H), 1.71 – 1.54 (m, 3H), 1.52 – 1.38 (m, 2H).

**<sup>13</sup>C NMR** (100 MHz,  $\text{CDCl}_3$ ).  $\delta$  162.5, 150.3, 146.6, 133.9 (q,  $J = 3.1$  Hz), 128.1 (q,  $J = 34.1$  Hz), 123.4, 121.8 (q,  $J = 271.3$  Hz), 80.1, 64.0, 26.0, 19.7, 18.9.

**<sup>19</sup>F NMR** (376 MHz, Chloroform-*d*)  $\delta$  -64.81.

**ESI-HRMS**: calcd for  $\text{C}_{13}\text{H}_{14}\text{F}_3\text{N}_2\text{O}^+$  ( $[\text{M} + \text{H}]^+$ ) = 271.1053, found 271.1043.

**IR** (neat): 2938, 2863, 1673, 1571, 1529, 1395, 1331, 1266, 1164, 1131, 1099, 1017, 871, 803  $\text{cm}^{-1}$ .

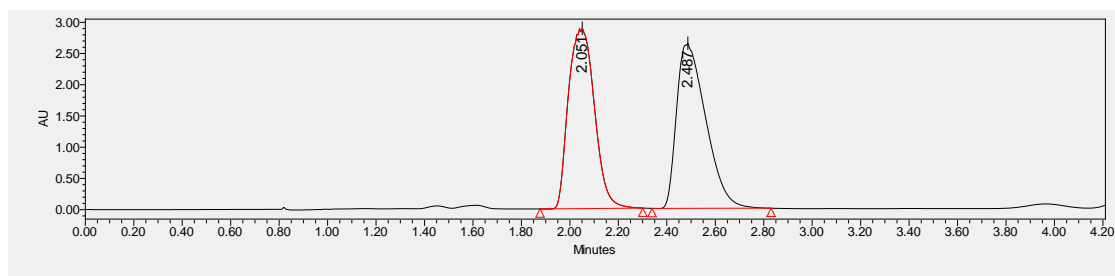

|   | Retention Time | Area     | % Area |
|---|----------------|----------|--------|
| 1 | 2.051          | 21456234 | 49.31  |
| 2 | 2.487          | 22052819 | 50.69  |

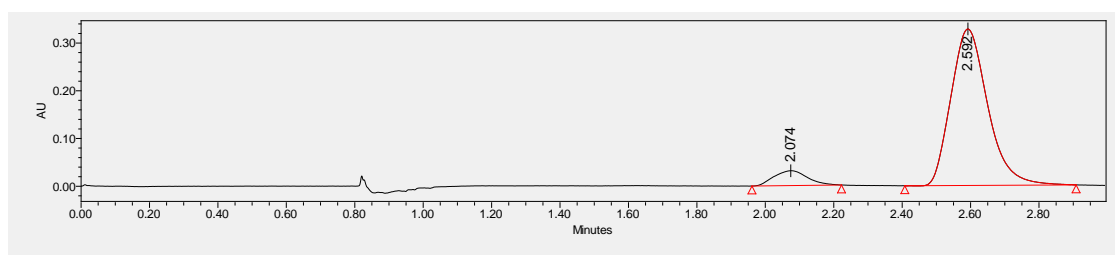

|   | Retention Time | Area    | % Area |
|---|----------------|---------|--------|
| 1 | 2.074          | 212580  | 7.98   |
| 2 | 2.592          | 2450221 | 92.02  |

**2i: (3aS,7aR)-2-(5-methylpyridin-2-yl)-3a,4,5,6,7,7a-hexahydrobenzo[d]oxazole**

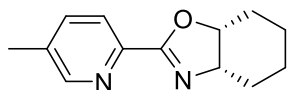

**2i**

Following the typical procedure, colourless oil **2i** was isolated in 79% yield (16.9 mg) and 98% ee.  $[\alpha]_D^{25} = -97.4$  ( $c = 0.280$  in  $\text{CH}_2\text{Cl}_2$ ).

**UPC<sup>2</sup>** (chiral OX-3 column),  $\text{CO}_2/\text{MeOH} = 90/10$ , flow rate 1.5 mL/min,  $\lambda = 254$  nm, retention time:  $t$  (minor) = 8.5 min,  $t$  (major) = 10.3 min.

**<sup>1</sup>H NMR** (400 MHz, Chloroform-*d*).  $\delta$  8.54 (s, 1H), 7.96 (d,  $J = 8.0$  Hz, 1H), 7.57 (d,  $J = 9.6$  Hz, 1H), 4.76 (dt,  $J = 8.2, 5.2$  Hz, 1H), 4.24 – 4.06 (m, 1H), 2.39 (s, 3H), 2.08– 1.78 (m, 4H), 1.69 – 1.58 (m, 2H), 1.52 – 1.30 (m, 2H).

**<sup>13</sup>C NMR** (100 MHz,  $\text{CDCl}_3$ ).  $\delta$  163.6, 150.1, 144.6, 136.9, 135.5, 123.2, 79.6, 63.6, 27.7, 26.1, 19.9, 19.0, 18.5.

**ESI-HRMS**: calcd for  $\text{C}_{13}\text{H}_{17}\text{N}_2\text{O}^+$  ( $[\text{M} + \text{H}]^+$ ) = 217.1335, found 217.1329.

**IR** (neat): 2927, 2851, 1613, 1517, 1493, 1312, 1147, 891, 876  $\text{cm}^{-1}$ .

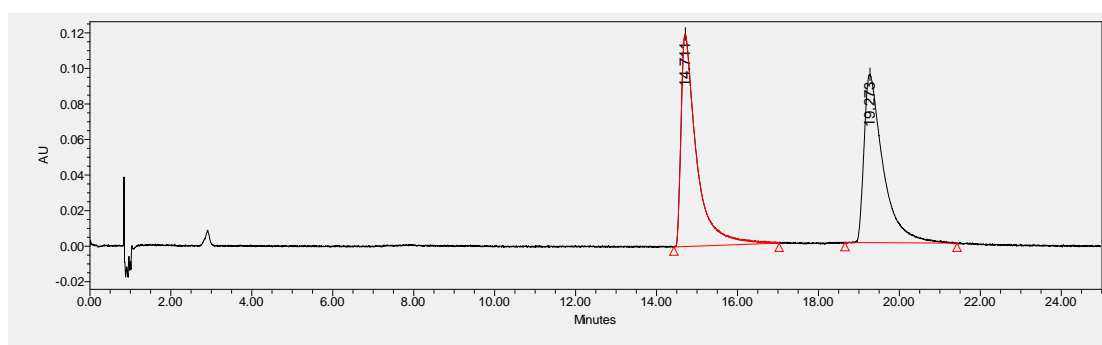

|   | Retention Time | Area    | % Area |
|---|----------------|---------|--------|
| 1 | 14.711         | 3186789 | 50.82  |
| 2 | 19.273         | 3084287 | 49.18  |

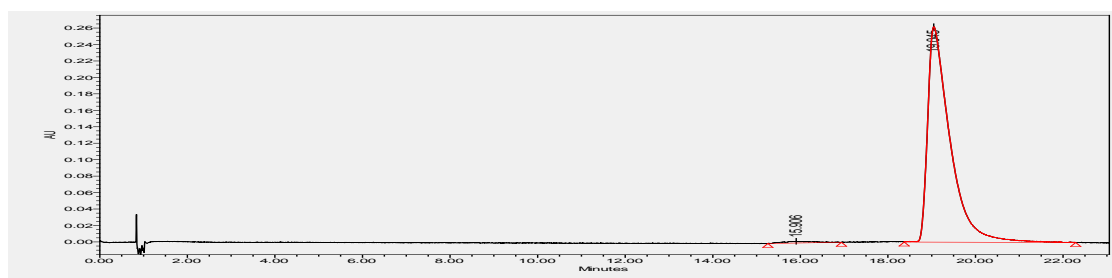

|   | Retention Time | Area    | % Area |
|---|----------------|---------|--------|
| 1 | 15.906         | 97478   | 1.04   |
| 2 | 19.045         | 9271138 | 98.96  |

**2j: (3aS,7aR)-2-(3-methylpyridin-2-yl)-3a,4,5,6,7,7a-hexahydrobenzo[d]oxazole**

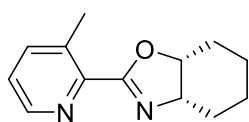

**2j**

Following the typical procedure, colourless oil **2j** was isolated in 78% yield (16.9 mg) and 96% ee.  $[\alpha]_D^{19} = -9.02$  ( $c = 0.964$  in  $\text{CH}_2\text{Cl}_2$ ).

**UPC<sup>2</sup>** (chiral AD-3 column),  $\text{CO}_2/\text{MeOH} = 90/10$ , flow rate 1.5 mL/min,  $\lambda = 254$  nm, retention time:  $t$  (minor) = 2.5 min,  $t$  (major) = 3.7 min.

**<sup>1</sup>H NMR** (600 MHz, Chloroform-*d*).  $\delta$  8.49 (d,  $J = 5.0$  Hz, 1H), 7.83 (s, 1H), 7.14 (d,  $J = 5.8$  Hz, 1H), 4.71 (dt,  $J = 8.2, 5.1$  Hz, 1H), 4.19 – 3.99 (m, 1H), 2.33 (s, 3H), 2.03 – 1.69 (m, 4H), 1.64 – 1.56 (m, 2H), 1.53 – 1.33 (m, 2H).

**<sup>13</sup>C NMR** (151 MHz, Chloroform-*d*)  $\delta$  162.3, 145.9, 145.1, 138.2, 133.7, 123.6, 77.6, 63.1, 26.9, 24.9, 19.4, 18.9, 18.0.

**ESI-HRMS**: calcd for  $\text{C}_{13}\text{H}_{17}\text{N}_2\text{O}^+$  ( $[\text{M} + \text{H}]^+$ ) = 217.1335, found 217.1328.

**IR** (neat): 2931, 2859, 1725, 1662, 1512, 1449, 1269, 1098  $\text{cm}^{-1}$ .

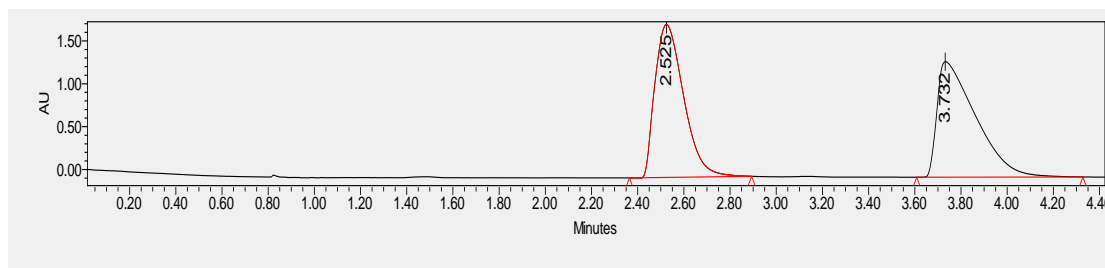

|   | Retention Time | Area     | % Area |
|---|----------------|----------|--------|
| 1 | 2.525          | 15375898 | 49.66  |
| 2 | 3.732          | 15587417 | 50.34  |

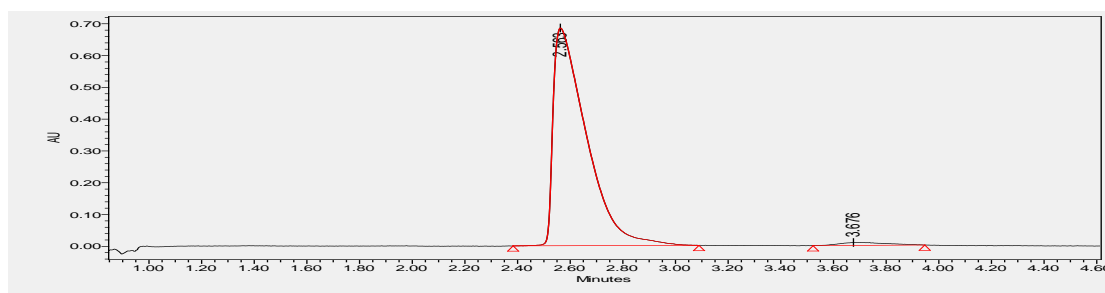

|   | Retention Time | Area    | % Area |
|---|----------------|---------|--------|
| 1 | 2.563          | 5987932 | 98.11  |
| 2 | 3.676          | 115145  | 1.89   |

**2k: (3aS,7aR)-2-(isoquinolin-3-yl)-3a,4,5,6,7,7a-hexahydrobenzo[d]oxazole**

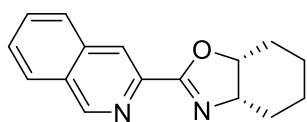

**2k**

Following the typical procedure, white solid **2k** was isolated in 90% yield (22.6 mg) and 72% ee.  $[\alpha]_D^{25} = 120.9$  ( $c = 0.372$  in  $\text{CH}_2\text{Cl}_2$ ). M.p.: 69 – 72 °C.

**UPC<sup>2</sup>** (chiral OX-3 column),  $\text{CO}_2/\text{MeOH} = 90/10$ , flow rate 1.5 mL/min,  $\lambda = 254$  nm, retention time:  $t$  (major) = 12.8 min,  $t$  (minor) = 16.5 min.

**<sup>1</sup>H NMR** (400 MHz, Chloroform-*d*).  $\delta$  9.25 (d,  $J = 8.4$  Hz, 1H), 8.66 (d,  $J = 5.5$  Hz, 1H), 7.86 (d,  $J = 7.5$  Hz, 1H), 7.81 – 7.60 (m, 3H), 4.92 – 4.77 (m, 1H), 4.48 – 4.27 (m, 1H), 2.23 – 2.00 (m, 2H), 1.99 – 1.76 (m, 2H), 1.72 – 1.59 (m, 2H), 1.56 – 1.36 (m, 2H).

**<sup>13</sup>C NMR** (100 MHz,  $\text{CDCl}_3$ ).  $\delta$  146.9, 141.8, 136.7, 130.3, 128.4, 127.4, 127.3, 127.0, 123.1, 78.72, 64.6, 27.8, 26.0, 19.9, 19.0.

**ESI-HRMS**: calcd for  $\text{C}_{16}\text{H}_{17}\text{N}_2\text{O}^+$  ( $[\text{M} + \text{H}]^+$ ) = 253.1355, found 253.1329.

**IR** (neat): 2934, 2859, 1665, 1582, 1561, 1552, 1447, 1421, 1157, 1136, 989, 819, 764, 747  $\text{cm}^{-1}$ .

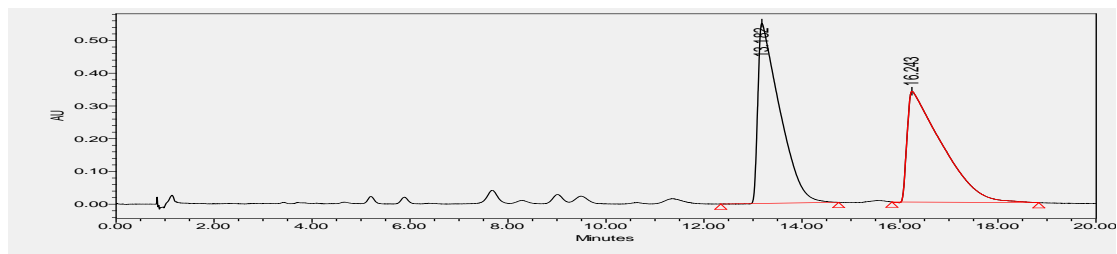

|   | Retention Time | Area     | % Area |
|---|----------------|----------|--------|
| 1 | 13.182         | 16989430 | 50.45  |
| 2 | 16.243         | 16683290 | 49.55  |

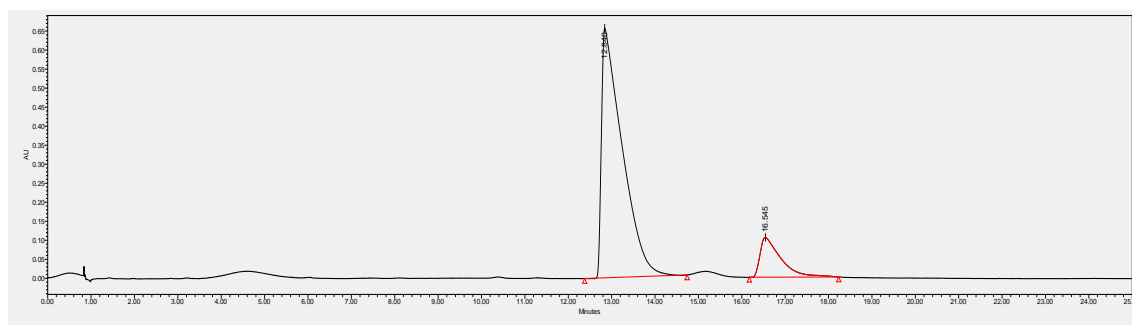

|   | Retention Time | Area     | % Area |
|---|----------------|----------|--------|
| 1 | 12.840         | 21730038 | 86.24  |
| 2 | 16.545         | 3465707  | 13.76  |

**2l: (3aS,6aR)-2-(pyridin-2-yl)-3a,5,6,6a-tetrahydro-4H-cyclopenta[d]oxazole**

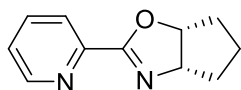

**2l**

Following the typical procedure, colourless oil **2l** was isolated in 83% yield (16.0 mg) and 91% ee.  $[\alpha]^{25}_D = -97.4$  ( $c = 0.530$  in  $\text{CH}_2\text{Cl}_2$ ).

**UPC<sup>2</sup>** (chiral OX-3 column),  $\text{CO}_2/\text{MeOH} = 90/10$ , flow rate 1.5 mL/min,  $\lambda = 254$  nm, retention time:  $t$  (minor) = 8.9 min,  $t$  (major) = 10.8 min.

**<sup>1</sup>H NMR** (400 MHz, Chloroform-*d*).  $\delta$  8.78 – 8.65 (m, 1H), 8.03 (m, 1H), 7.77 (m, 1H), 7.38 (m, 1H), 5.25 – 5.16 (m, 1H), 4.82 – 4.73 (m, 1H), 2.20 (dd,  $J = 13.9, 5.7$  Hz, 1H), 2.05 (dd,  $J = 13.9, 5.7$  Hz, 1H), 1.90 – 1.60 (m, 4H), 1.63 – 1.44 (m, 1H).

**<sup>13</sup>C NMR** (100 MHz,  $\text{CDCl}_3$ ).  $\delta$  163.0, 149.7, 146.7, 136.5, 125.3, 123.8, 85.6, 72.1, 34.6, 33.8, 22.2.

**ESI-HRMS**: calcd for  $\text{C}_{11}\text{H}_{13}\text{N}_2\text{O}^+$  ( $[\text{M} + \text{H}]^+$ ) = 189.1022, found 189.1017.

**IR** (neat): 2961, 2854, 1659, 1587, 1521, 1360, 1263, 1100, 1023, 748, 685  $\text{cm}^{-1}$ .

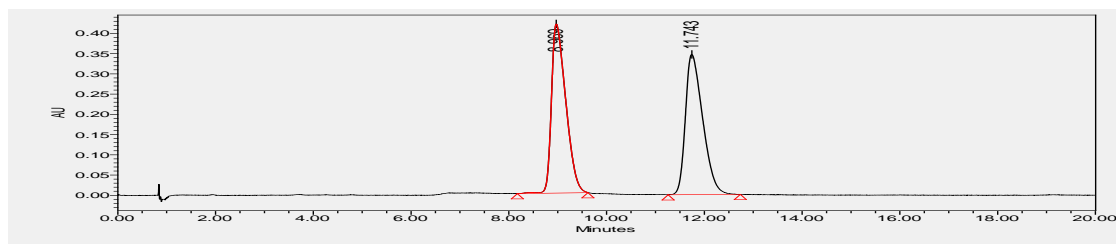

|   | Retention Time | Area    | % Area |
|---|----------------|---------|--------|
| 1 | 8.969          | 8500981 | 49.91  |
| 2 | 11.743         | 8532681 | 50.09  |

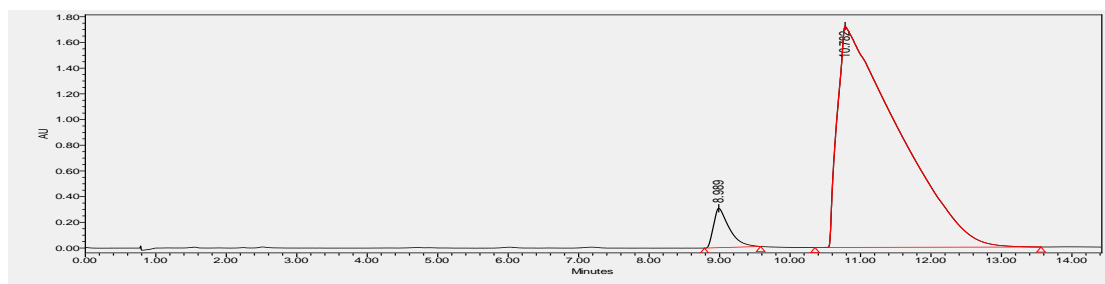

|   | Retention Time | Area      | % Area |
|---|----------------|-----------|--------|
| 1 | 8.989          | 4729858   | 4.41   |
| 2 | 10.782         | 102447810 | 95.59  |

**2m: (3aS,7aR)-2-(pyridin-2-yl)-3a,4,7,7a-tetrahydrobenzo[d]oxazole**

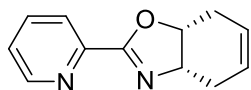

**2m**

Following the typical procedure, colourless oil **2m** was isolated in 80% yield (15.9 mg) and 89% ee.  $[\alpha]^{25}_D = -211.4$  ( $c = 0.112$  in  $\text{CH}_2\text{Cl}_2$ ).

**UPC<sup>2</sup>** (chiral OX-3 column),  $\text{CO}_2/\text{MeOH} = 90/10$ , flow rate 1.5 mL/min,  $\lambda = 254$  nm, retention time:  $t$  (minor) = 9.7 min,  $t$  (major) = 12.5 min.

**<sup>1</sup>H NMR** (400 MHz, Chloroform-*d*).  $\delta$  8.63 (m, 1H), 7.93 (m, 1H), 7.68 (m, 1H), 7.30 (ddd,  $J = m$ , 1H), 5.94 – 5.73 (m, 2H), 5.10 – 5.00 (m, 1H), 4.79 – 4.53 (m, 1H), 2.64 – 2.50 (m, 1H), 2.56 – 2.34 (m, 1H), 2.31 – 2.17 (m, 2H).

**<sup>13</sup>C NMR** (100 MHz,  $\text{CDCl}_3$ ).  $\delta$  163.2, 149.7, 146.7, 136.5, 128.4, 125.9, 125.4, 123.8, 79.4, 65.4, 27.8, 27.7.

**ESI-HRMS**: calcd for  $\text{C}_{12}\text{H}_{13}\text{N}_2\text{O}^+$  ( $[\text{M} + \text{H}]^+$ ) = 201.1022, found 201.1015.

**IR** (neat): 2921, 2853, 1665, 1552, 1466, 1434, 1262, 1093, 799, 732, 702  $\text{cm}^{-1}$ .

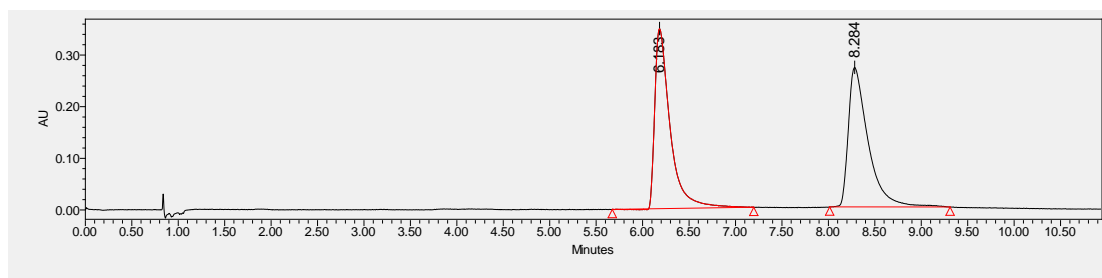

|   | Retention Time | Area    | % Area |
|---|----------------|---------|--------|
| 1 | 6.183          | 4011469 | 50.11  |
| 2 | 8.284          | 3993387 | 49.89  |

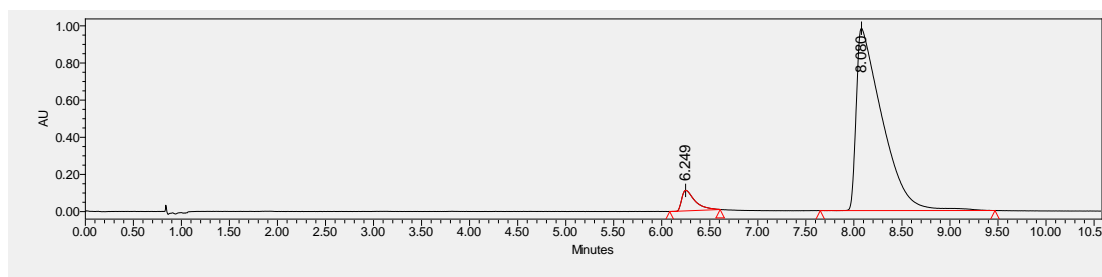

|   | Retention Time | Area     | % Area |
|---|----------------|----------|--------|
| 1 | 6.249          | 1055538  | 5.46   |
| 2 | 8.080          | 18277256 | 94.54  |



**2n: (3aS,9aR)-2-(pyridin-2-yl)-3a,4,9,9a-tetrahydronaphtho[2,3-d]oxazole**

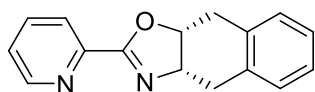

**2n**

Following the typical procedure, white solid **2n** was isolated in 90% yield (21.8 mg) and 91% ee.  $[\alpha]_D^{25} = -232.1$  ( $c = 0.056$  in  $\text{CH}_2\text{Cl}_2$ ). M.p.: 67 – 69 °C.

**UPC<sup>2</sup>** (chiral OX-3 column),  $\text{CO}_2/\text{MeOH} = 90/10$ , flow rate 1.5 mL/min,  $\lambda = 254$  nm, retention time:  $t$  (minor) = 11.1 min,  $t$  (major) = 16.4 min.

= 16.4 min.

**<sup>1</sup>H NMR** (400 MHz, Chloroform-*d*).  $\delta$  8.56 (m, 1H), 7.82 (m, 1H), 7.61 (m, 1H), 7.31 – 7.21 (m, 1H), 7.17 – 7.01 (m, 4H), 5.18 (dt,  $J = 9.6, 4.6$  Hz, 1H), 4.75 (dt,  $J = 10.3, 5.3$  Hz, 1H), 3.25 – 3.05 (m, 1H), 3.05 – 2.87 (m, 3H).

**<sup>13</sup>C NMR** (100 MHz,  $\text{CDCl}_3$ ).  $\delta$  163.0, 149.6, 146.5, 136.4, 136.0, 134.2, 128.4, 128.3, 126.9, 126.7, 125.4, 123.8, 79.4, 66.1, 33.7, 33.6.

**ESI-HRMS**: calcd for  $\text{C}_{16}\text{H}_{15}\text{N}_2\text{O}^+$  ( $[\text{M} + \text{H}]^+$ ) = 251.1179, found 251.1172.

**IR** (neat): 2941, 2873, 1648, 2578, 1519, 1257, 1041, 859, 801, 753, 687, 621  $\text{cm}^{-1}$ .

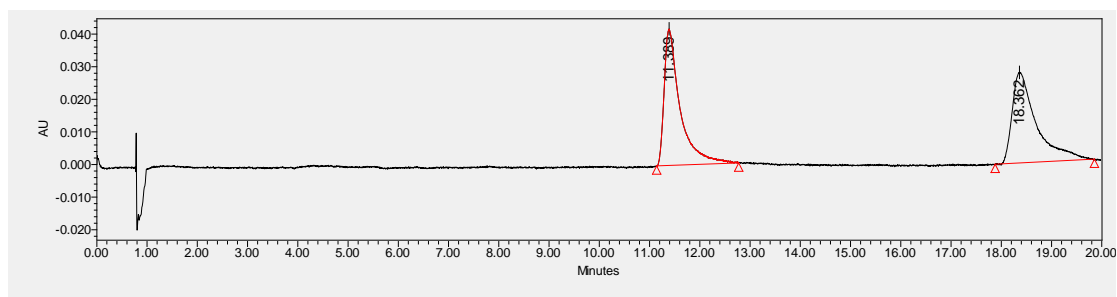

|   | Retention Time | Area   | % Area |
|---|----------------|--------|--------|
| 1 | 11.389         | 918156 | 49.76  |
| 2 | 18.362         | 926920 | 50.24  |

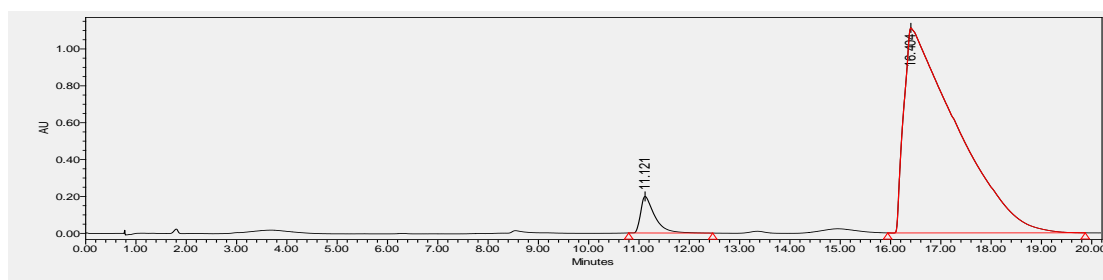

|   | Retention Time | Area     | % Area |
|---|----------------|----------|--------|
| 1 | 11.121         | 3836733  | 4.55   |
| 2 | 16.404         | 80554327 | 95.45  |

**2o: (3aS,8aR)-2-(pyridin-2-yl)-3a,5,6,7,8,8a-hexahydro-4H-cyclohepta[d]oxazole**

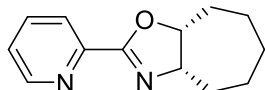

**2o**

Following the typical procedure, colourless oil **2o** was isolated in 70% yield (14.9 mg) and 89% ee.  $[\alpha]^{25}_D = -211.4$  ( $c = 0.336$  in  $\text{CH}_2\text{Cl}_2$ ).

**UPC<sup>2</sup>** (chiral OX-3 column),  $\text{CO}_2/\text{MeOH} = 91/9$ , flow rate 1.5 mL/min,  $\lambda = 254$  nm, retention time:  $t$  (minor) = 12.8 min,  $t$  (major) = 17.9 min.

**<sup>1</sup>H NMR** (400 MHz, Chloroform-*d*).  $\delta$  8.77 – 8.56 (m, 1H), 7.97 (d,  $J = 7.9$  Hz, 1H), 7.69 (td,  $J = 7.8, 1.7$  Hz, 1H), 7.35 – 7.26 (m, 1H), 4.87 (td,  $J = 10.0, 3.6$  Hz, 1H), 4.40 (td,  $J = 10.0, 3.6$  Hz, 1H), 2.01 – 1.81 (m, 3H), 1.78 – 1.60 (m, 3H), 1.45 – 1.21 (m, 4H).

**<sup>13</sup>C NMR** (100 MHz,  $\text{CDCl}_3$ ).  $\delta$  161.4, 149.6, 147.0, 136.5, 123.7, 83.9, 70.0, 31.4, 30.8, 30.7, 26.2, 24.3.

**ESI-HRMS**: calcd for  $\text{C}_{13}\text{H}_{17}\text{N}_2\text{O}^+$  ( $[\text{M} + \text{H}]^+$ ) = 217.1335, found 217.1329.

**IR** (neat): 2927, 2855, 1658, 1586, 1518, 1366, 1102, 748, 679  $\text{cm}^{-1}$ .

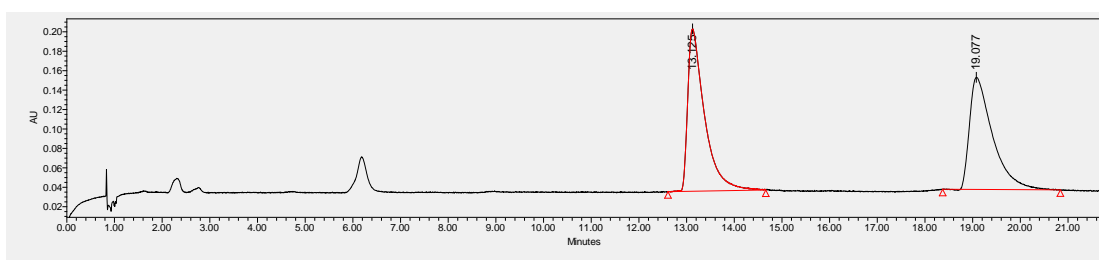

|   | Retention Time | Area    | % Area |
|---|----------------|---------|--------|
| 1 | 13.125         | 4078854 | 51.23  |
| 2 | 19.077         | 3883373 | 48.77  |

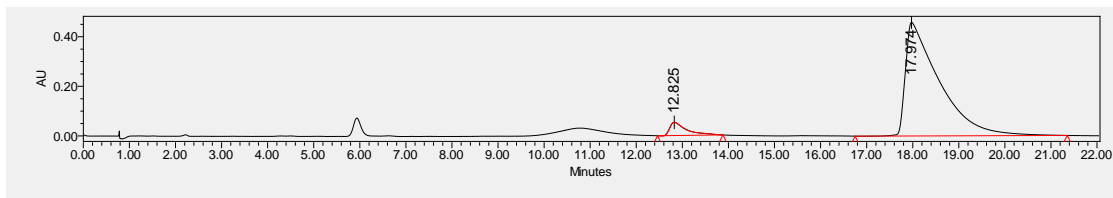

|   | Retention Time | Area     | % Area |
|---|----------------|----------|--------|
| 1 | 12.825         | 1342774  | 5.45   |
| 2 | 17.974         | 23298162 | 94.55  |

**2p: (4S,5R)-4,5-dipropyl-2-(pyridin-2-yl)-4,5-dihydrooxazole**

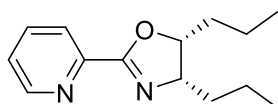

**2p**

Following the typical procedure, colourless oil **2p** was isolated in 60% yield (13.8 mg) and 90% ee.  $[\alpha]^{25}_D = -144.1$  ( $c = 0.287$  in  $\text{CH}_2\text{Cl}_2$ ).

**UPC<sup>2</sup>** (chiral OX-3 column),  $\text{CO}_2/\text{MeOH} = 93/7$ , flow rate 1.5 mL/min,  $\lambda = 254$  nm, retention time:  $t$  (minor) = 3.6 min,  $t$  (major) = 4.3 min.

**<sup>1</sup>H NMR** (400 MHz, Chloroform-*d*).  $\delta$  8.65 (d,  $J = 4.8$  Hz, 1H), 7.94 (d,  $J = 7.9$  Hz, 1H), 7.74 – 7.60 (m, 1H), 7.33 – 7.27 (m, 1H), 4.69 (td,  $J = 9.5, 3.6$  Hz, 1H), 4.26 – 4.11 (m, 1H), 1.60 – 1.35 (m, 8H), 1.06 – 0.83 (m, 6H).

**<sup>13</sup>C NMR** (100 MHz,  $\text{CDCl}_3$ ).  $\delta$  162.0, 149.8, 147.3, 136.5, 125.2, 123.7, 83.5, 68.2, 32.5, 31.5, 20.5, 20.0, 14.2, 14.0.

**ESI-HRMS**: calcd for  $\text{C}_{14}\text{H}_{21}\text{N}_2\text{O}^+$  ( $[\text{M} + \text{H}]^+$ ) = 233.1648, found 233.1642.

**IR** (neat): 2957, 2932, 2871, 1658, 1569 1522, 1433, 1030, 977, 747, 638, 620  $\text{cm}^{-1}$ .

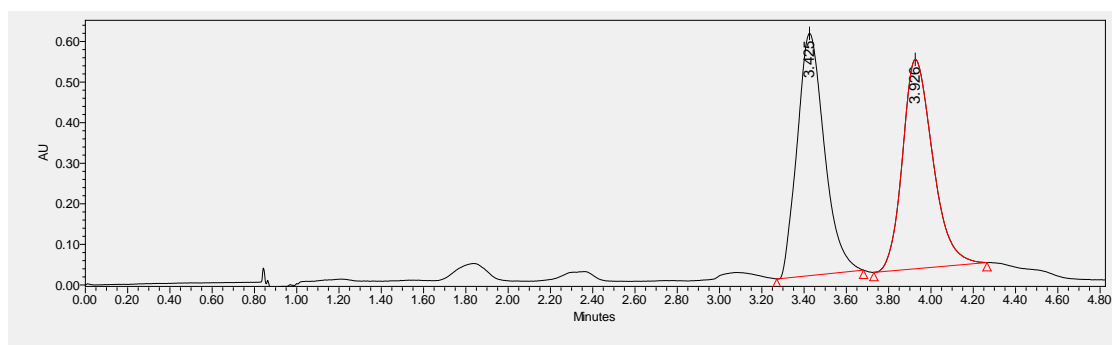

|   | Retention Time | Area    | % Area |
|---|----------------|---------|--------|
| 1 | 3.425          | 5328989 | 50.96  |
| 2 | 3.926          | 5128042 | 49.04  |

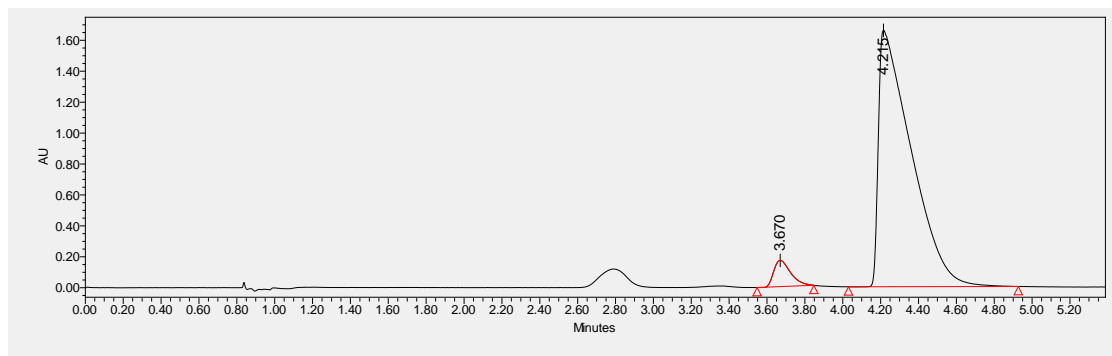

|   | Retention Time | Area     | % Area |
|---|----------------|----------|--------|
| 1 | 3.670          | 1052269  | 5.02   |
| 2 | 4.215          | 19920928 | 94.98  |

**2q: (3aS,4S,7R,7aR)-2-(pyridin-2-yl)-3a,4,5,6,7,7a-hexahydro-4,7-methanobenzo[d]oxazole**

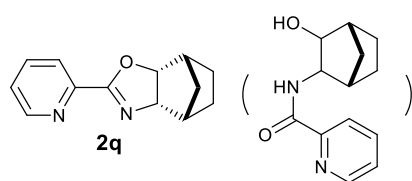

Following the typical procedure, white solid **2q** was isolated in 95% yield (20.4 mg) and >99% ee. (hydrolysis byproducts include).  $[\alpha]^{16}_D = +51.0$  ( $c = 0.200$  in  $\text{CH}_2\text{Cl}_2$ ). M. p. :71-73 °C

**UPC<sup>2</sup>** (chiral OX-3 column),  $\text{CO}_2/\text{MeOH} = 90/10$ , flow rate 1.5 mL/min,  $\lambda = 254$  nm, retention time:  $t$  (minor) = 8.0 min,  $t$  (major) = 10.5 min.

**<sup>1</sup>H NMR** (400 MHz, Chloroform-*d*).  $\delta$  8.71 (d,  $J = 2.3$  Hz, 1H), 8.03 (d,  $J = 7.9$  Hz, 1H), 7.77 (td,  $J = 7.8, 1.7$  Hz, 1H), 7.41 – 7.34 (m, 1H), 4.62 (d,  $J = 7.0$  Hz, 1H), 4.20 (d,  $J = 7.0$  Hz, 1H), 2.63 – 2.40 (m, 2H), 1.59 – 1.55 (m, 2H), 1.29 – 1.17 (m, 4H).

**<sup>13</sup>C NMR** (100 MHz,  $\text{CDCl}_3$ ).  $\delta$  164.2, 149.7, 146.6, 136.6, 125.5, 123.9, 86.4, 75.2, 41.2, 41.2, 31.4, 25.7, 23.5.

**ESI-HRMS**: calcd for  $\text{C}_{13}\text{H}_{15}\text{N}_2\text{O}^+$  ( $[\text{M} + \text{H}]^+$ ) = 215.1179, found 215.1177.

**IR** (neat): 2901, 1636, 1585, 1589, 1470, 1440, 1358, 1327, 1289, 1112, 982, 891, 746, 679  $\text{cm}^{-1}$ .

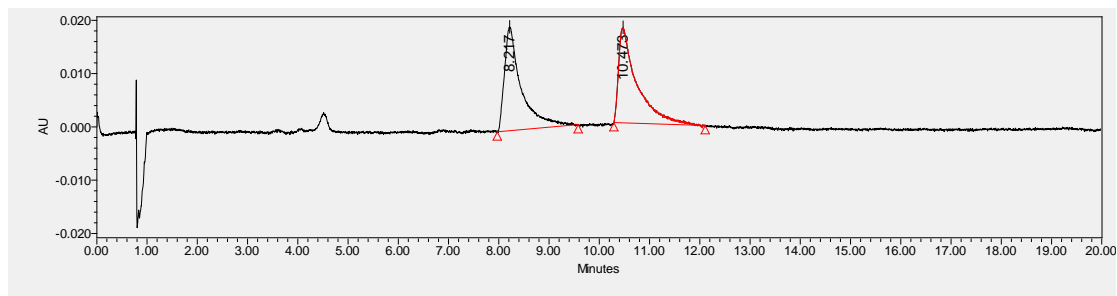

|   | Retention Time | Area   | % Area |
|---|----------------|--------|--------|
| 1 | 8.217          | 450643 | 49.95  |
| 2 | 10.473         | 451623 | 50.05  |

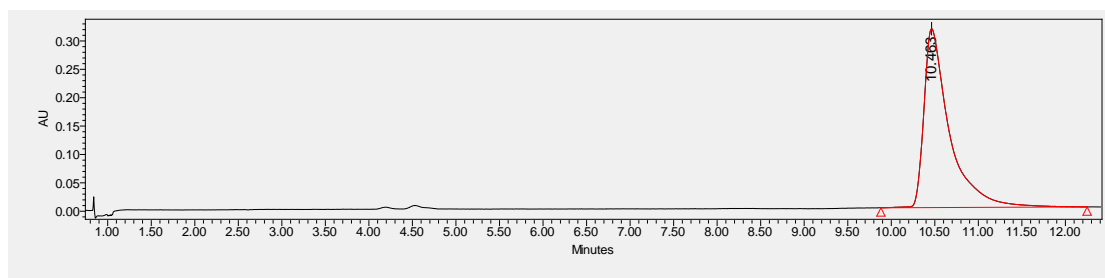

|   | Retention Time | Area    | % Area |
|---|----------------|---------|--------|
| 1 | 10.547         | 4985322 | 100.00 |

**2r: 5-benzyl-5-methyl-2-(pyridin-2-yl)-4,5-dihydrooxazole**

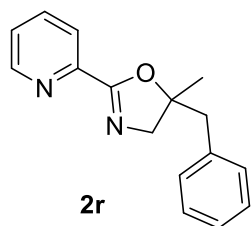

**<sup>1</sup>H NMR** (400 MHz, Chloroform-*d*).  $\delta$  8.65 (d,  $J = 4.8$  Hz, 1H), 7.94 (d,  $J = 7.9$  Hz, 1H), 7.74 – 7.60 (m, 1H), 7.33 – 7.27 (m, 1H), 4.69 (td,  $J = 9.5, 3.6$  Hz, 1H), 4.26 – 4.11 (m, 1H), 1.60 – 1.35 (m, 8H), 1.06 – 0.83 (m, 6H).

**<sup>13</sup>C NMR** (100 MHz, CDCl<sub>3</sub>).  $\delta$  162.0, 149.8, 147.3, 136.5, 125.2, 123.7, 83.5, 68.2, 32.5, 31.5, 20.5, 20.0, 14.2, 14.0.

**2r': 4-benzyl-4-methyl-2-(pyridin-2-yl)-4,5-dihydrooxazole**

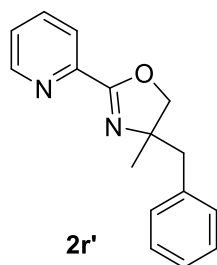

**<sup>1</sup>H NMR** (400 MHz, Chloroform-*d*).  $\delta$  8.65 (d,  $J = 4.8$  Hz, 1H), 7.94 (d,  $J = 7.9$  Hz, 1H), 7.74 – 7.60 (m, 1H), 7.33 – 7.27 (m, 1H), 4.69 (td,  $J = 9.5, 3.6$  Hz, 1H), 4.26 – 4.11 (m, 1H), 1.60 – 1.35 (m, 8H), 1.06 – 0.83 (m, 6H).

**<sup>13</sup>C NMR** (100 MHz, CDCl<sub>3</sub>).  $\delta$  162.0, 149.8, 147.3, 136.5, 125.2, 123.7, 83.5, 68.2, 32.5, 31.5, 20.5, 20.0, 14.2, 14.0.

(Z. Q. Li, Y. Fu, R. Deng, V. T. Tran, Y. Gao, P. Liu, K. M. Engle, *Angew. Chem. Int. Ed.* 2020, 59, 23306)

# 14. NMR spectrum.

2a

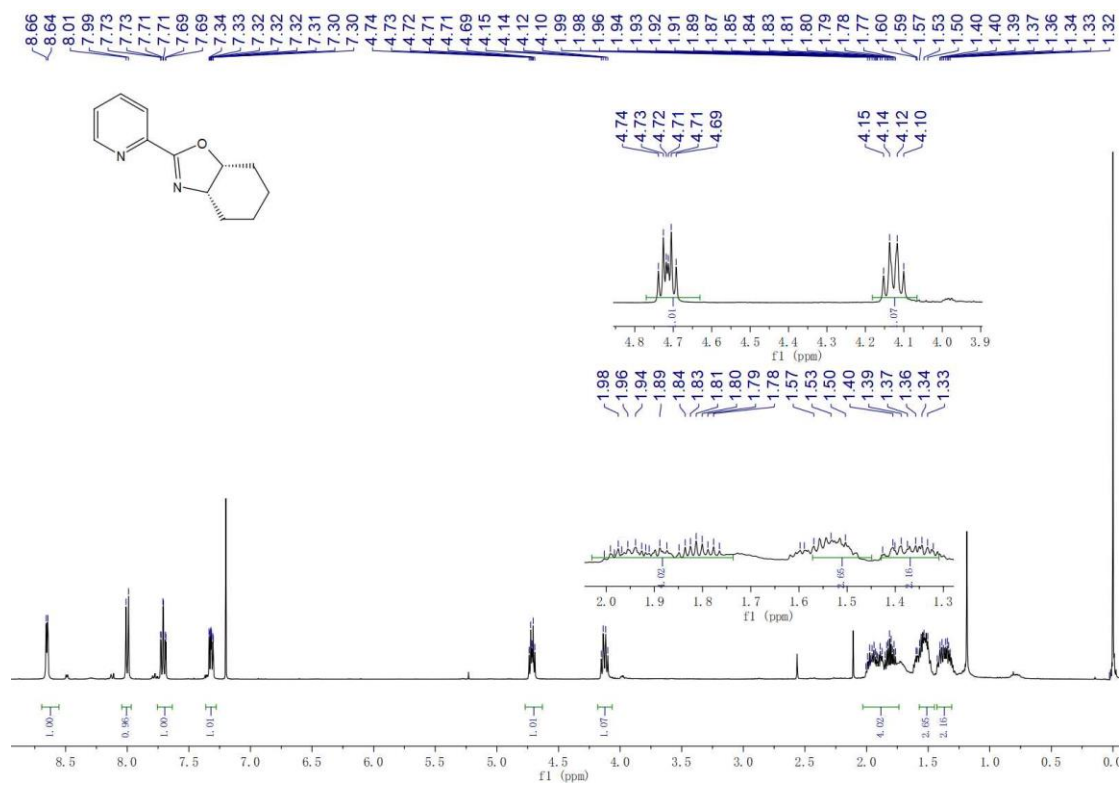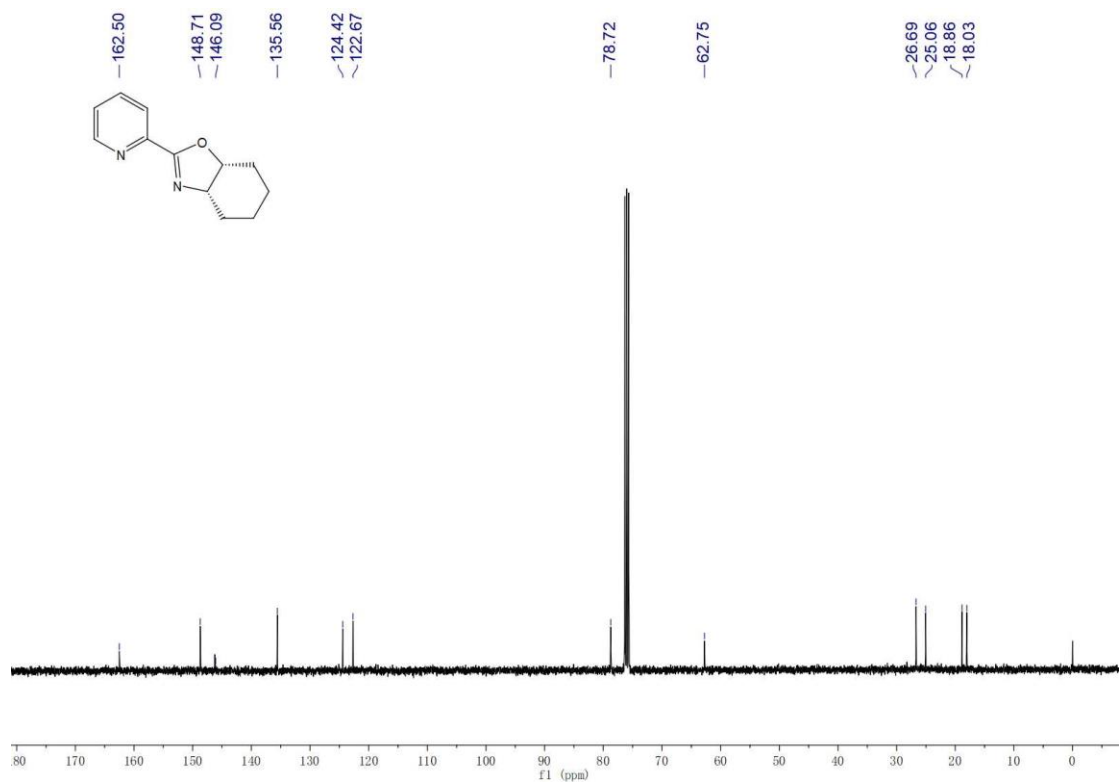

2b

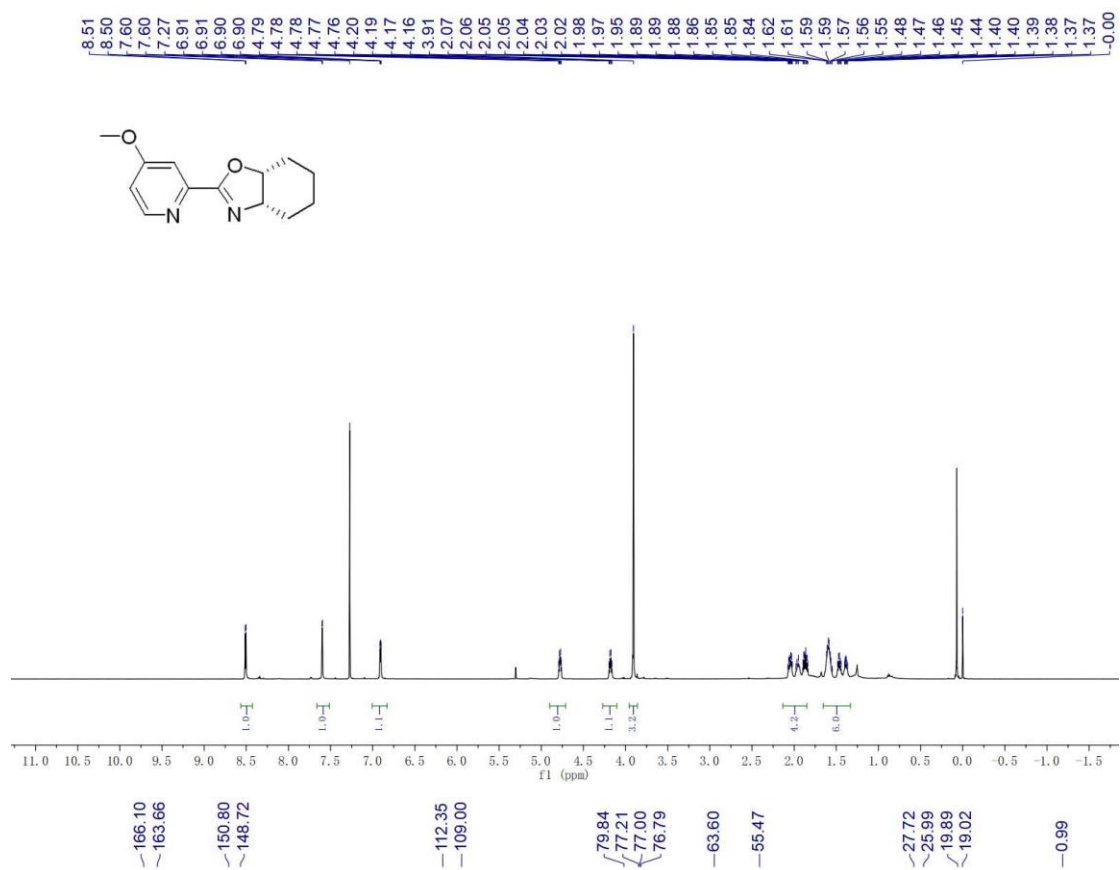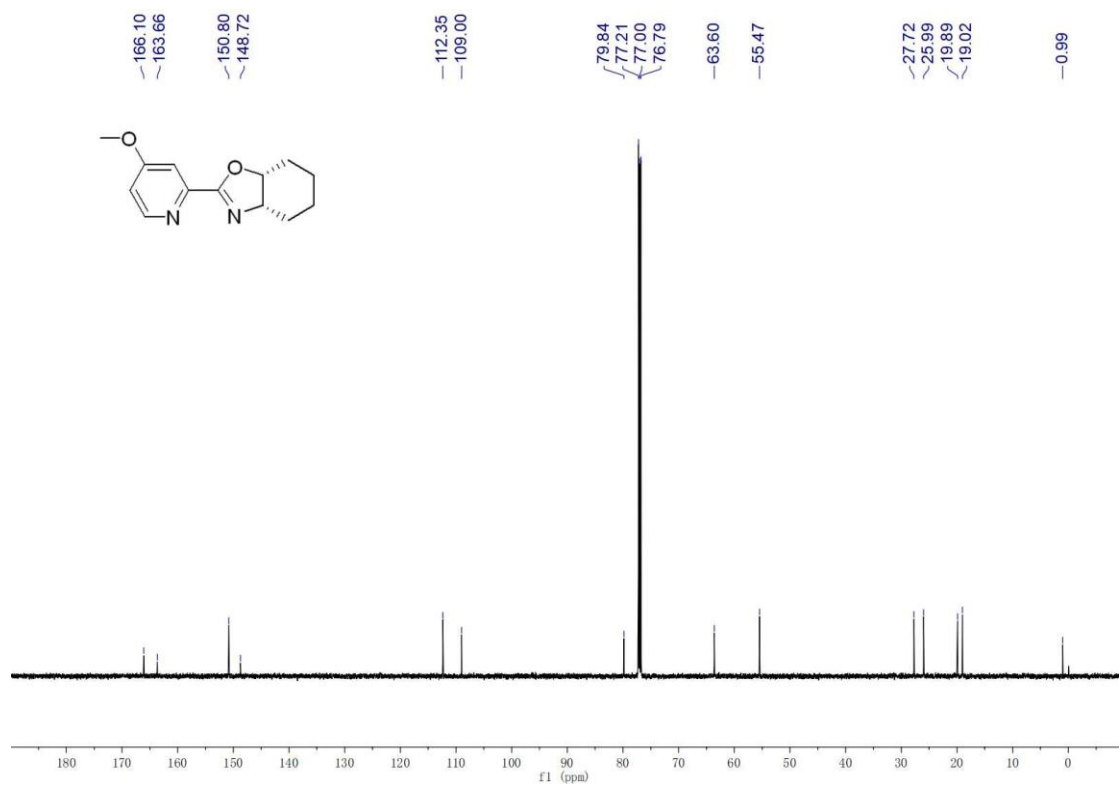

2c

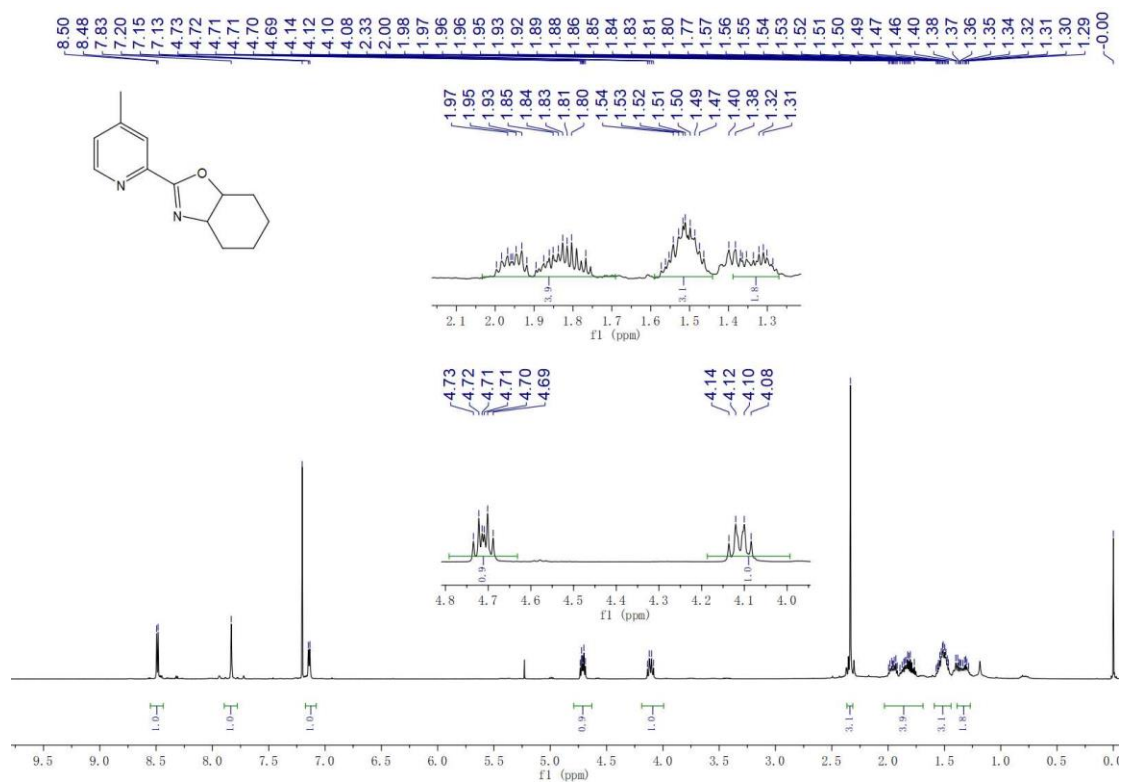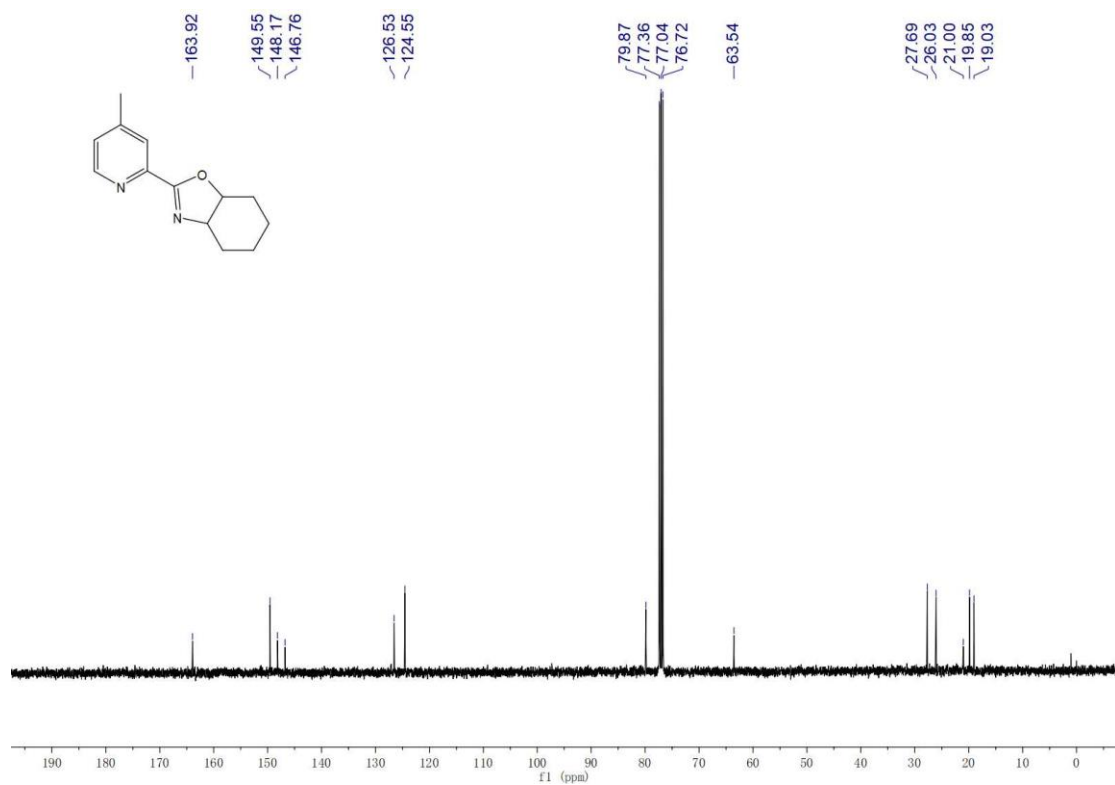



2d

8.46  
8.45  
8.20  
8.19  
7.50  
7.49  
7.48  
7.20  
4.75  
4.73  
4.73  
4.72  
4.71  
4.70  
4.16  
4.15  
4.13  
4.13  
4.11  
1.95  
1.94  
1.93  
1.91  
1.90  
1.89  
1.88  
1.88  
1.87  
1.87  
1.85  
1.83  
1.82  
1.81  
1.80  
1.78  
1.59  
1.59  
1.58  
1.57  
1.56  
1.55  
1.54  
1.52  
1.52  
1.51  
1.50  
1.49  
1.49  
1.47  
1.47  
1.40  
1.39  
1.37  
1.37  
1.36  
1.35  
1.34  
1.33  
1.32

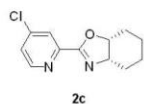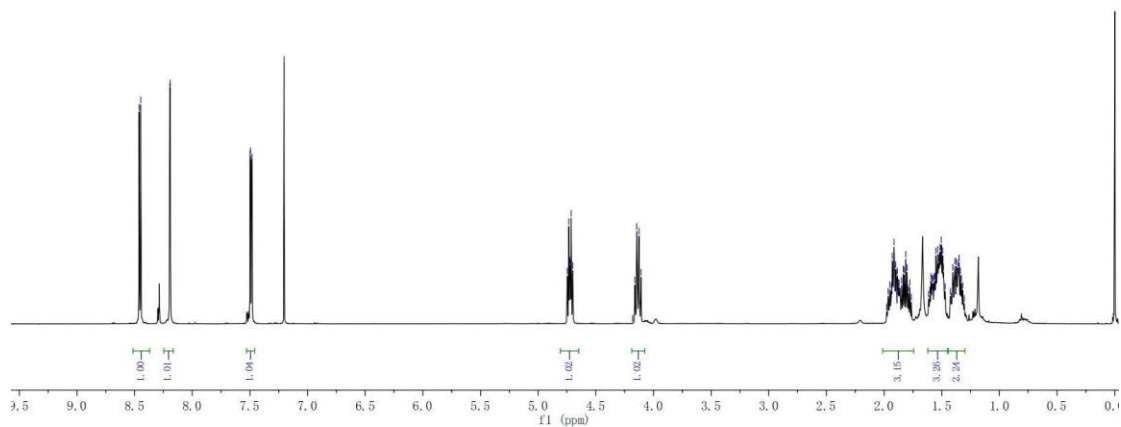

162.48  
150.37  
148.34  
133.34  
128.69  
127.09  
80.07  
63.88  
27.60  
26.04  
19.80  
18.97

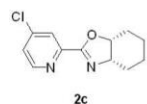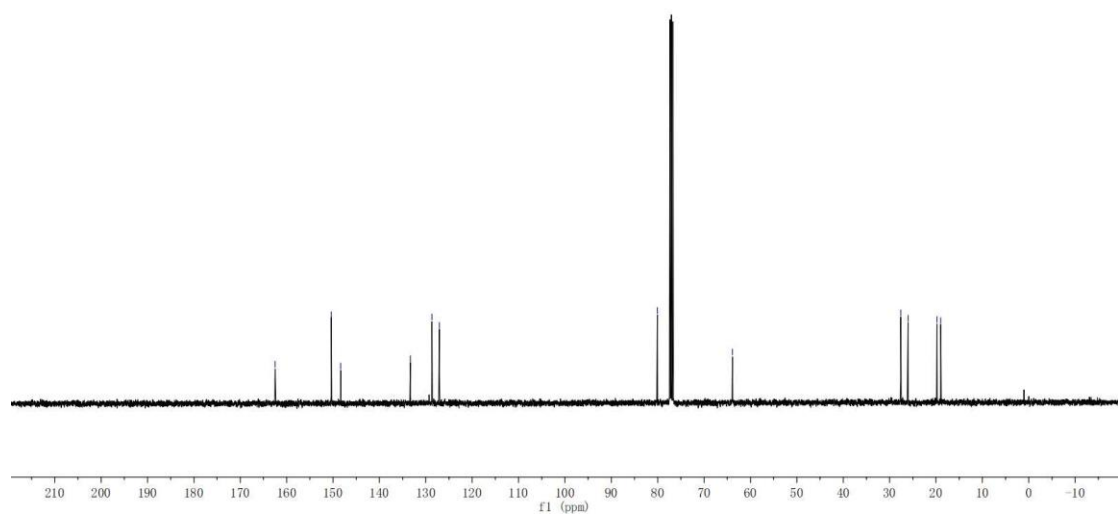

2e

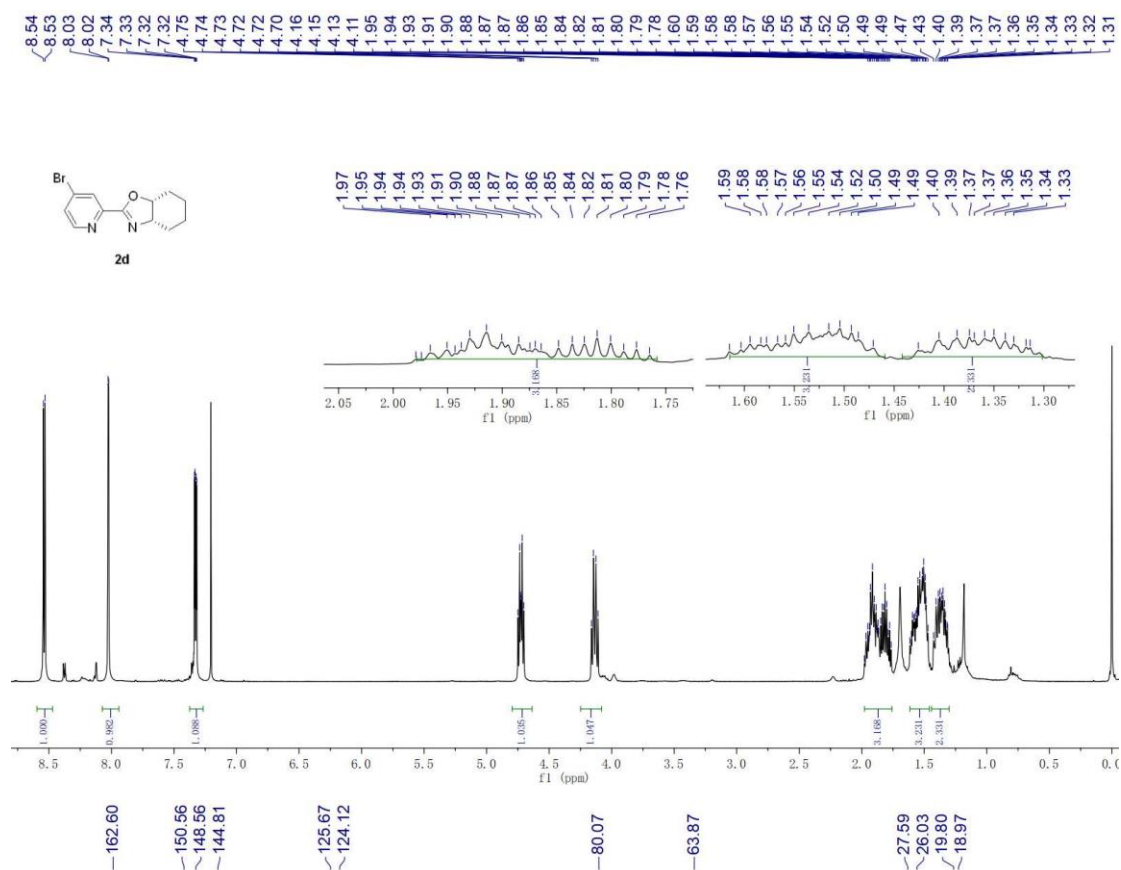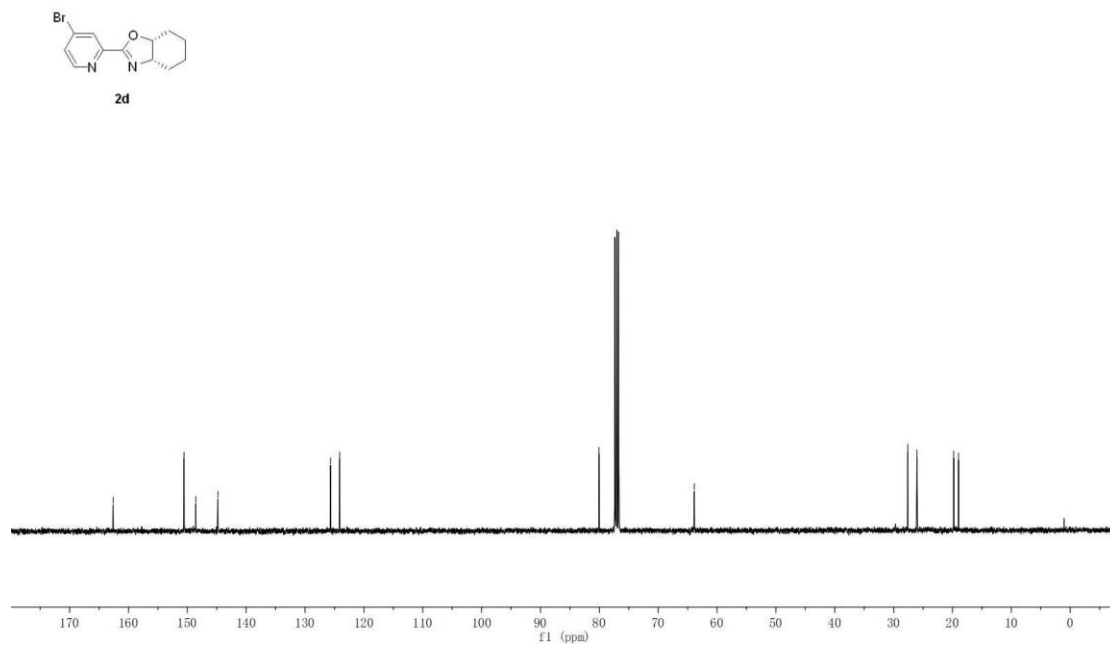

2f

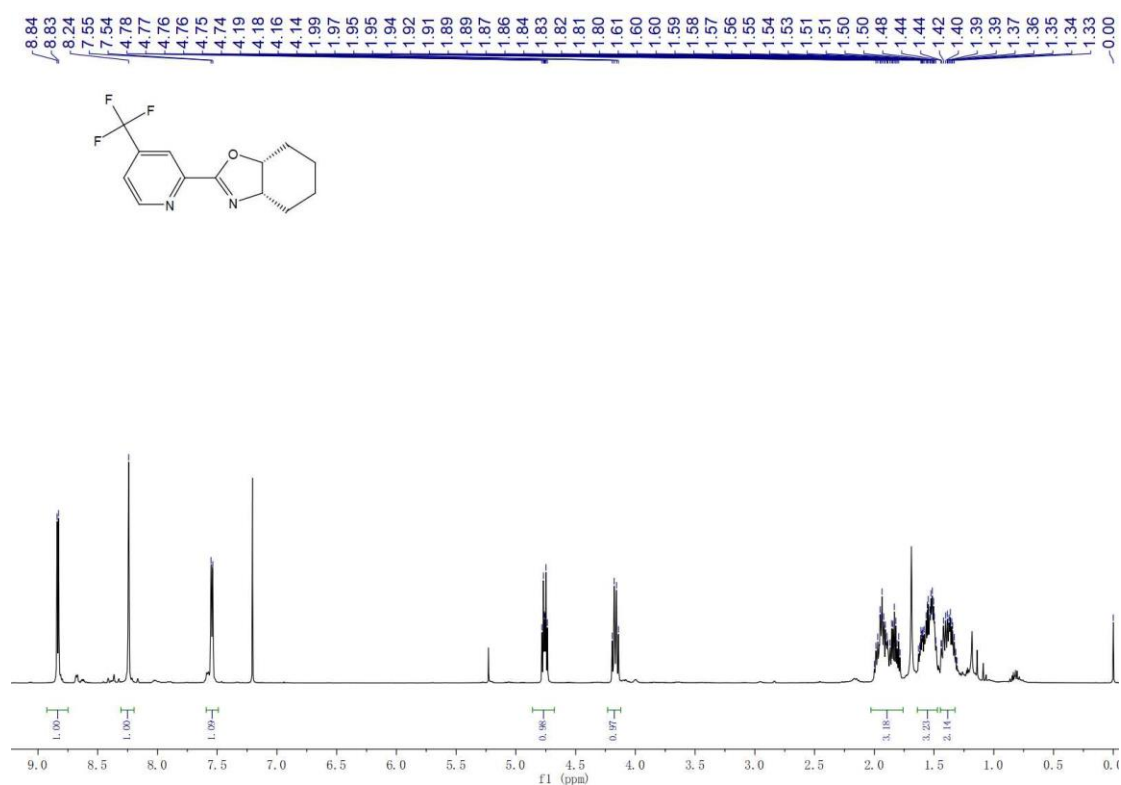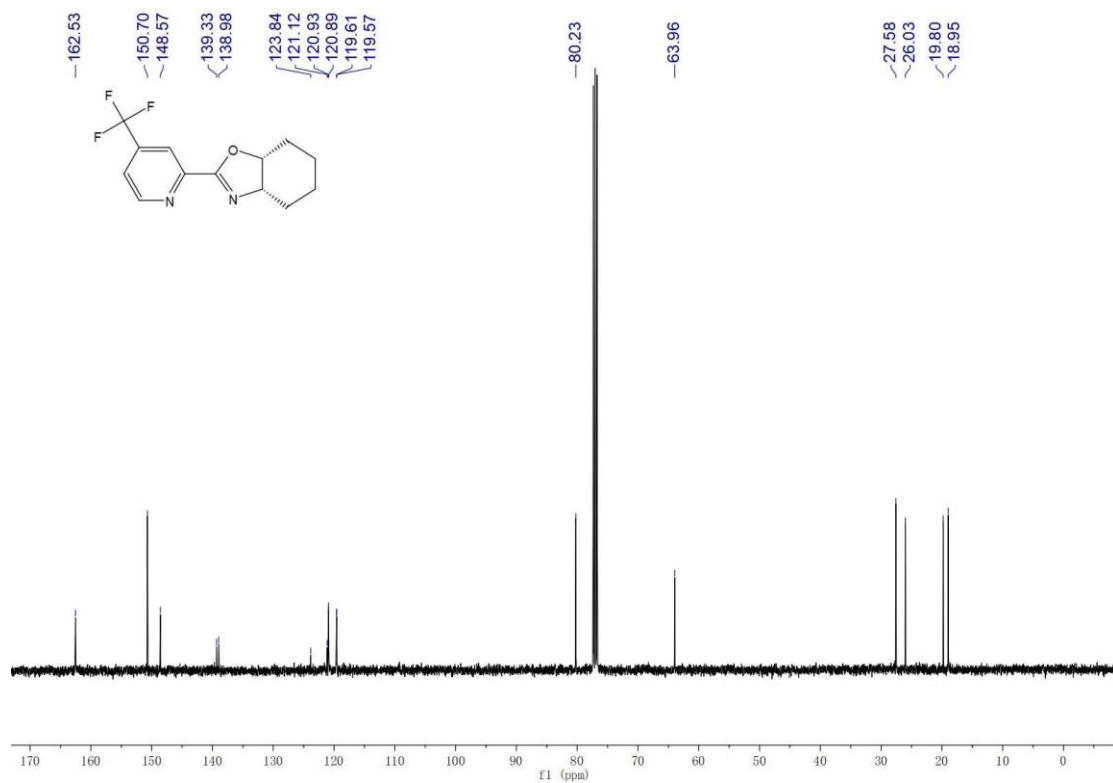

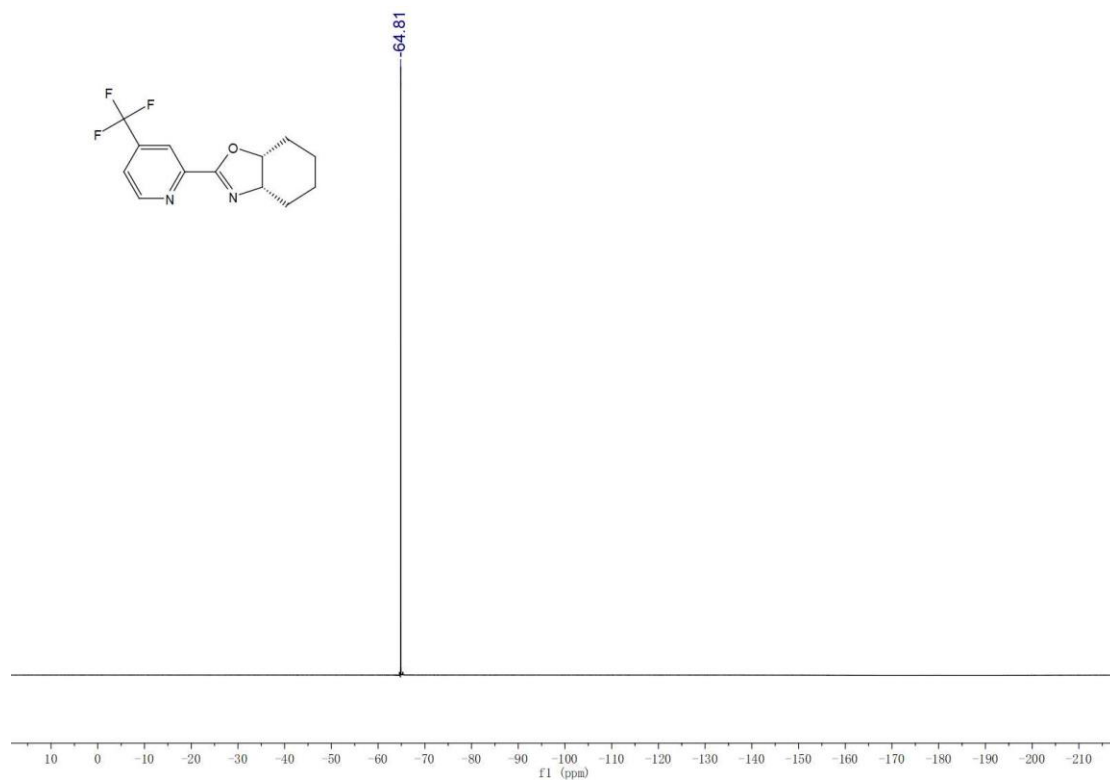

2g

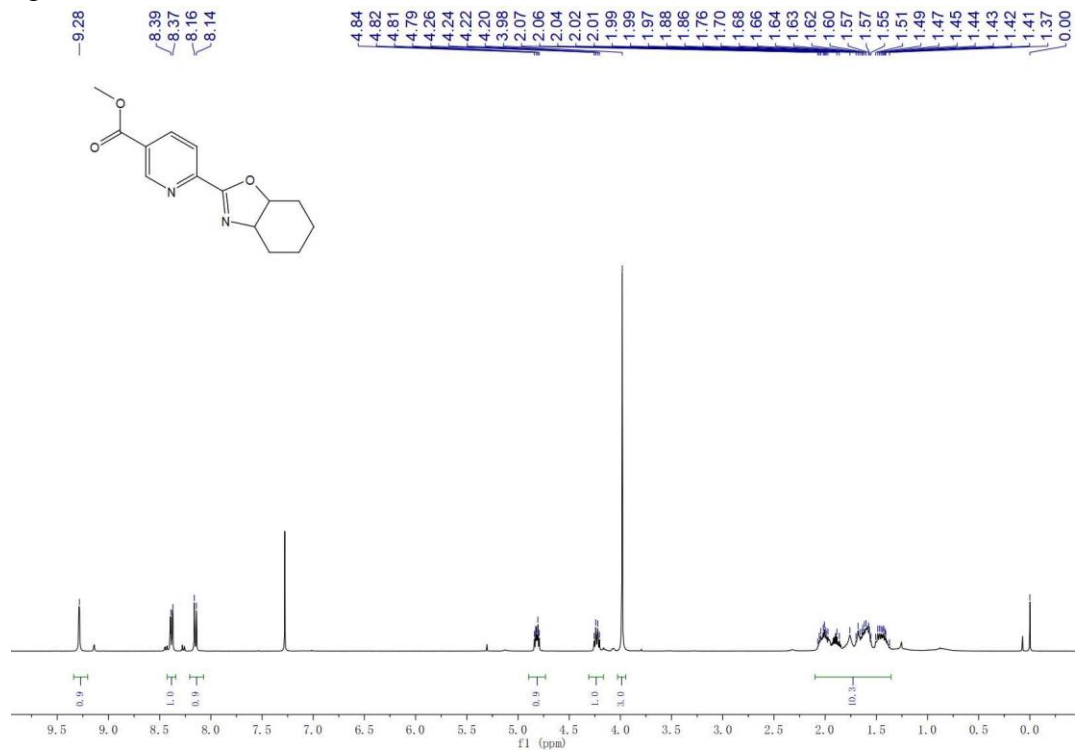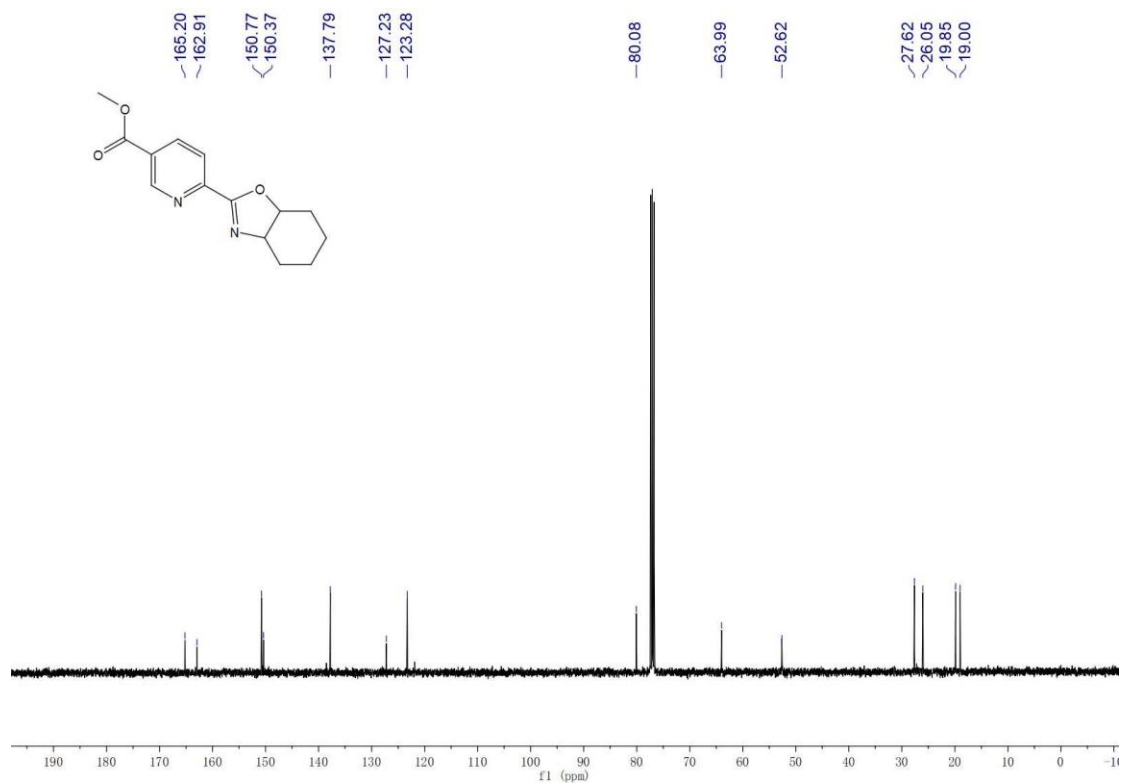

2h

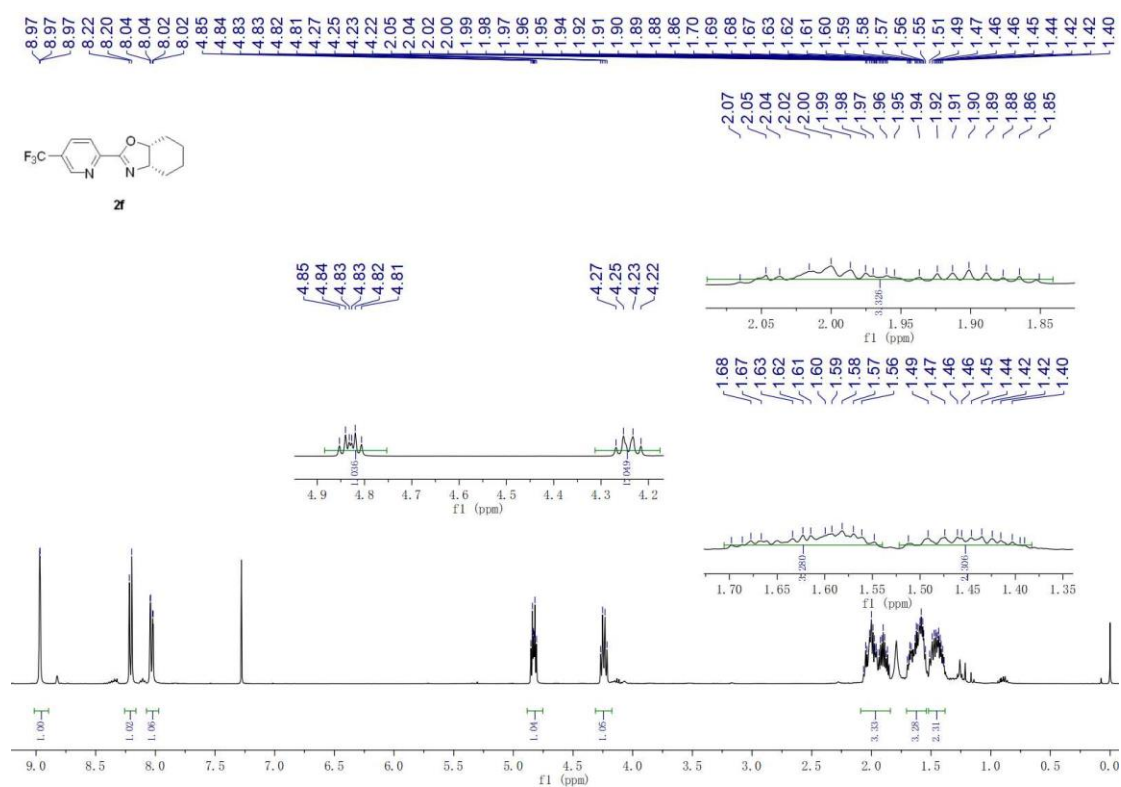

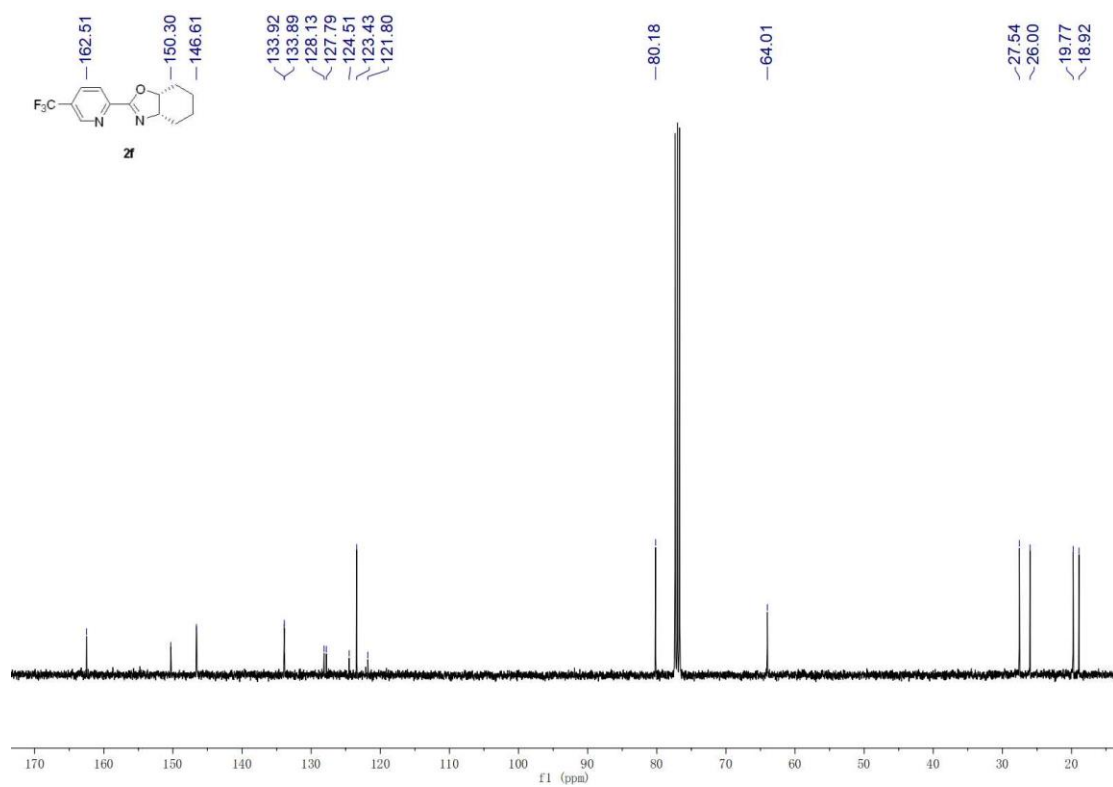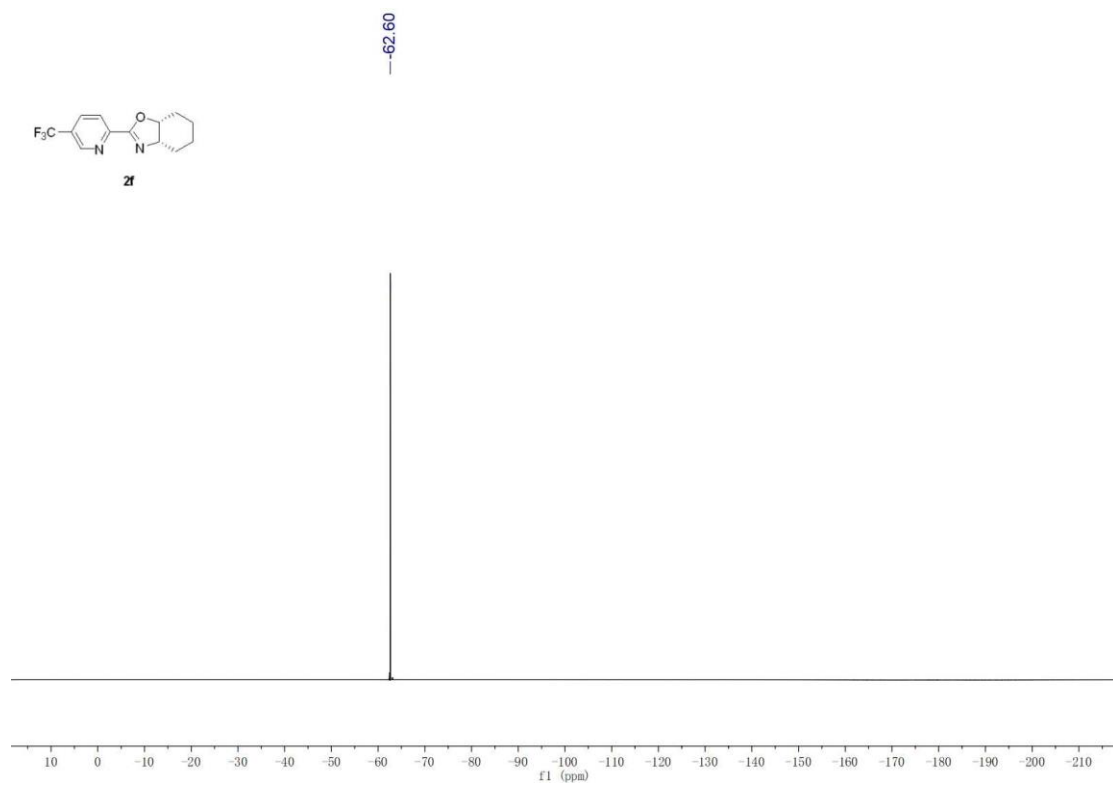

2i

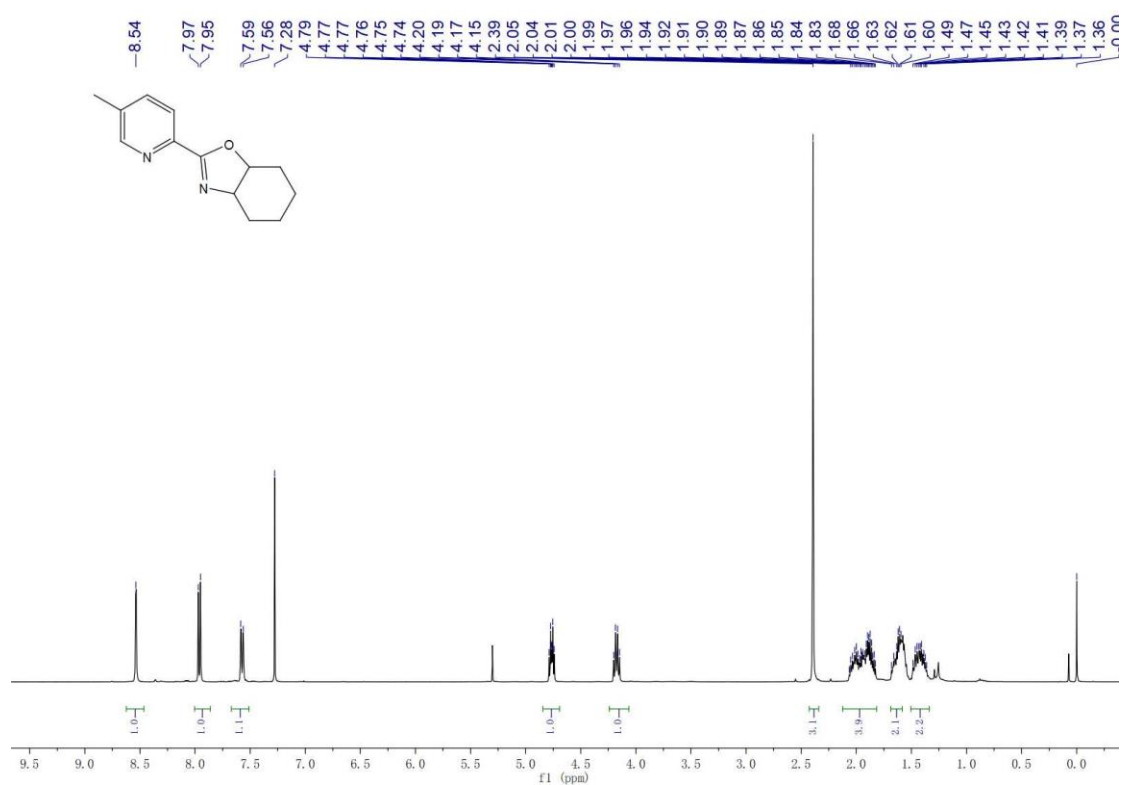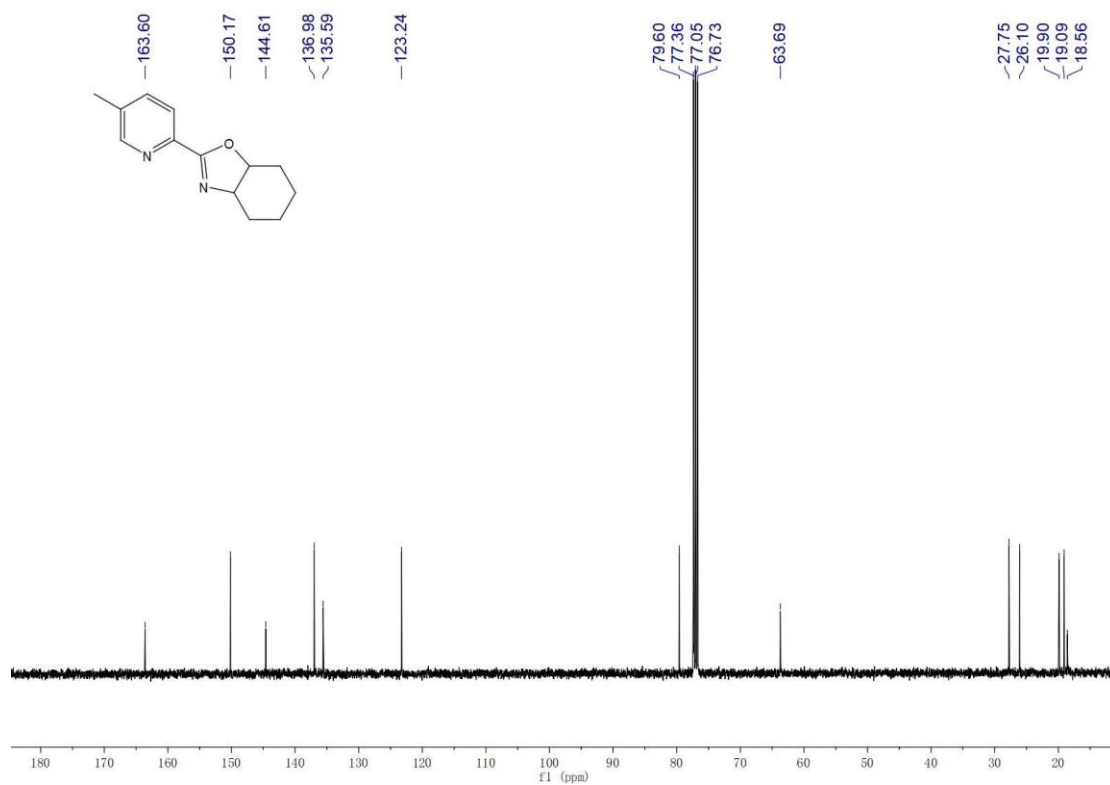



2j

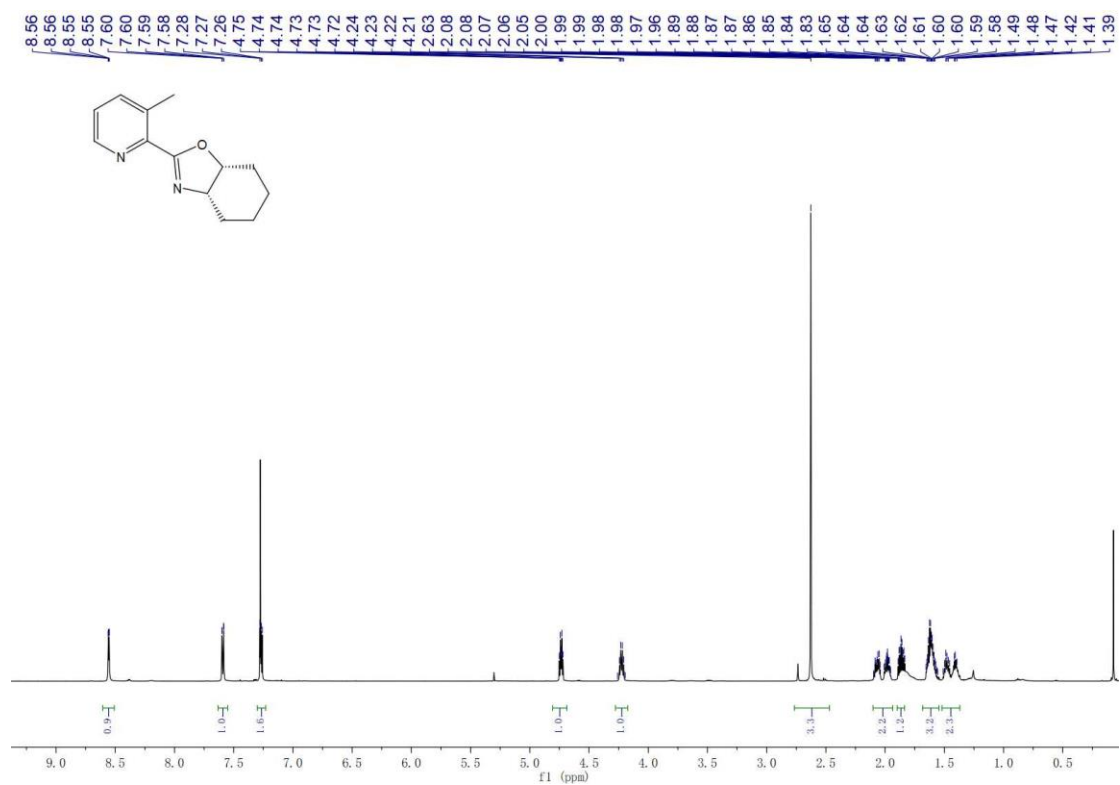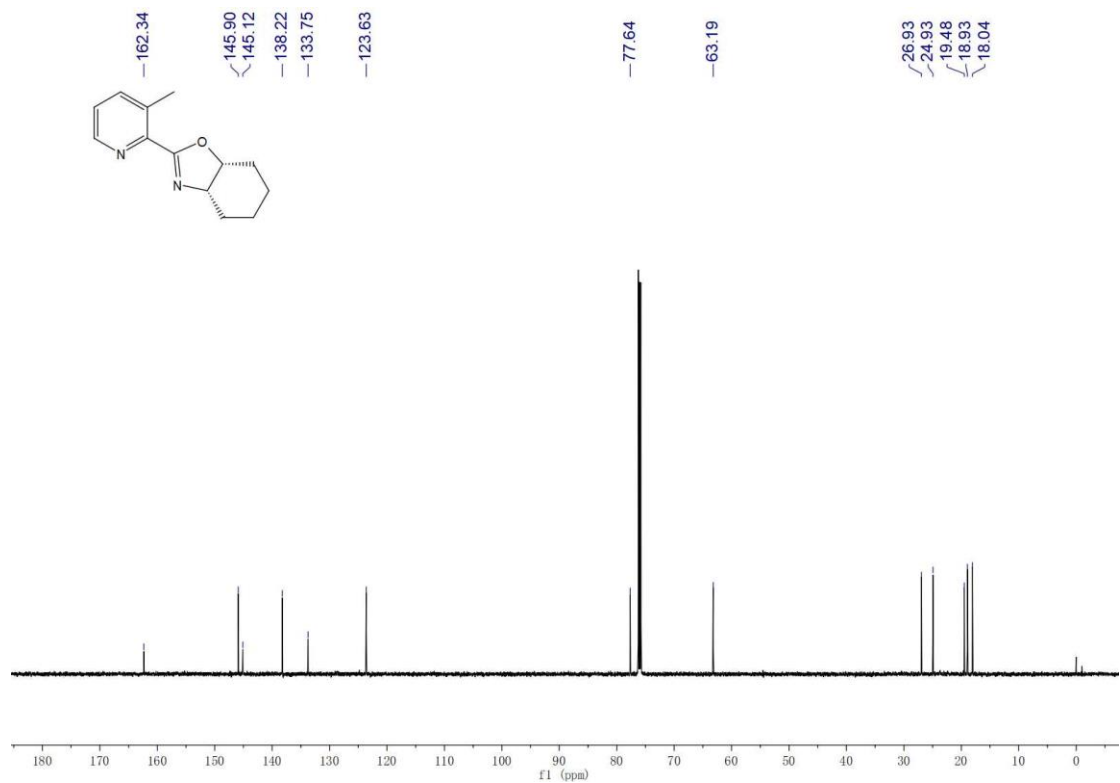

2k

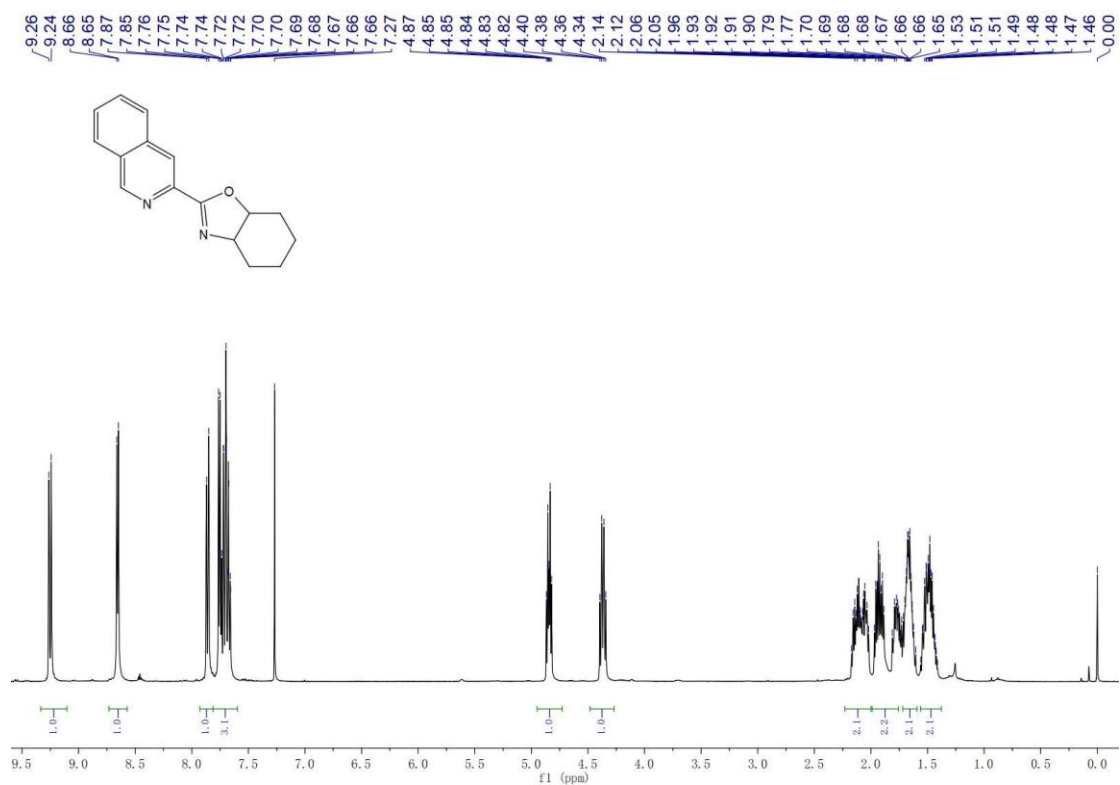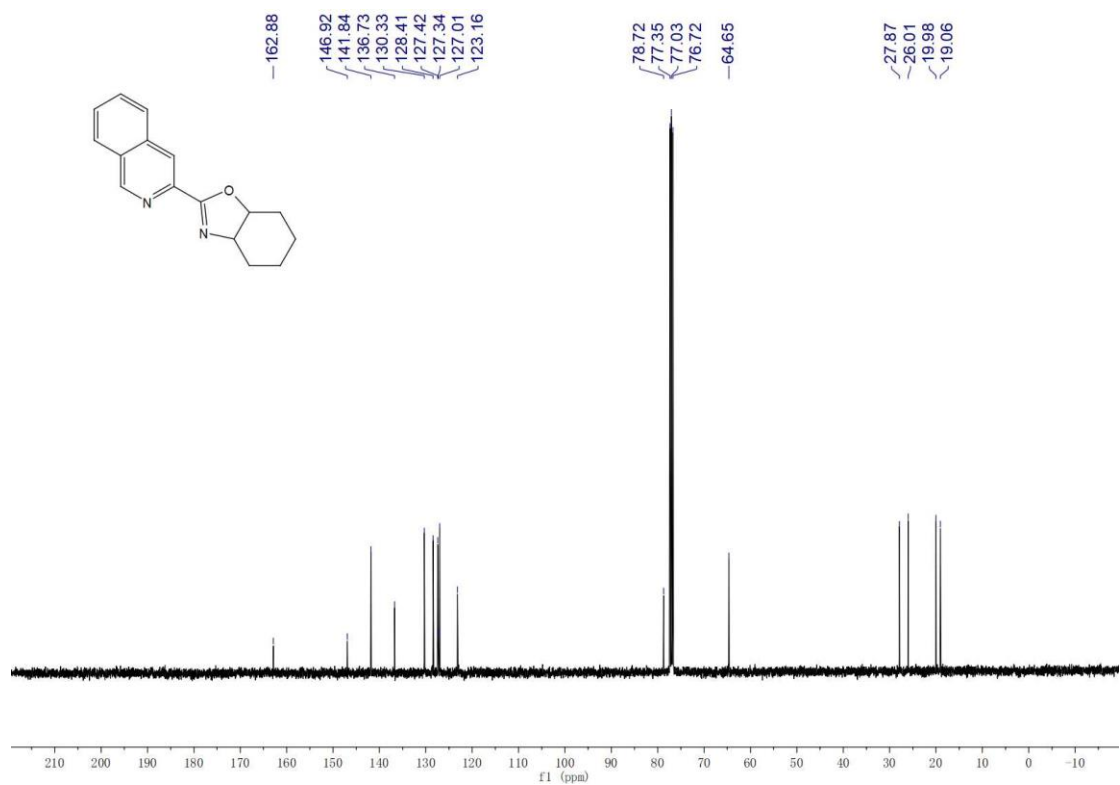

21

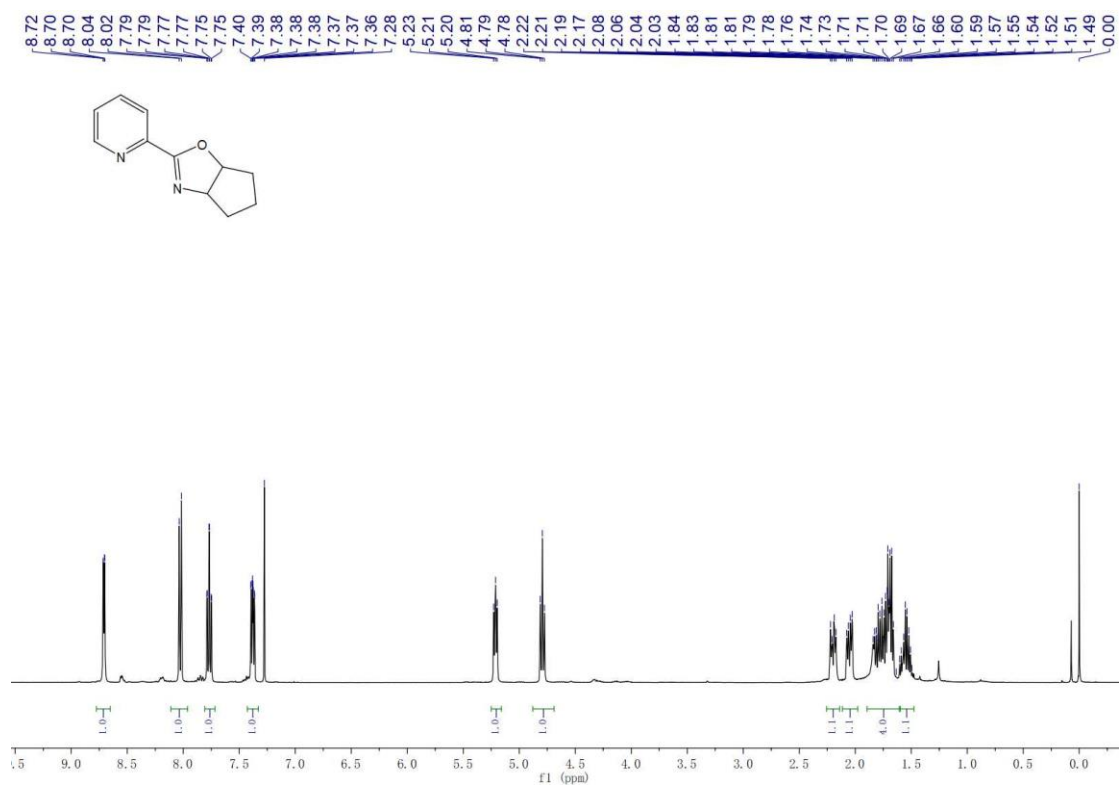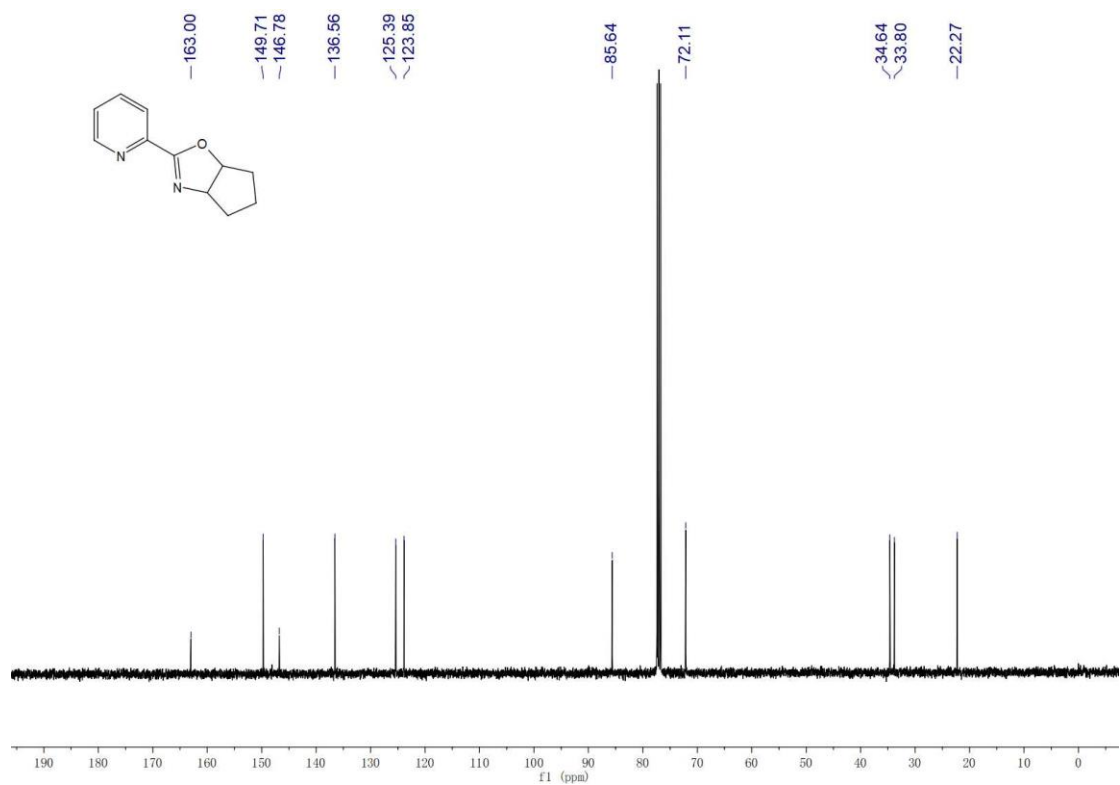

2m

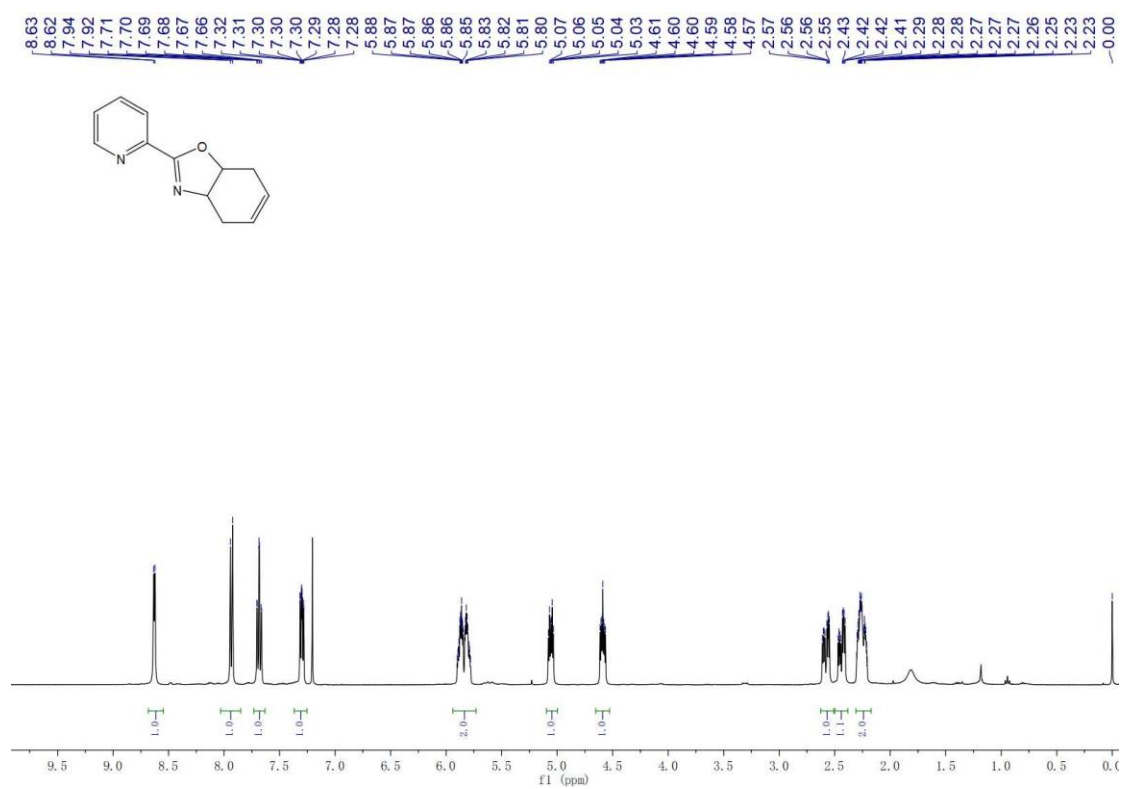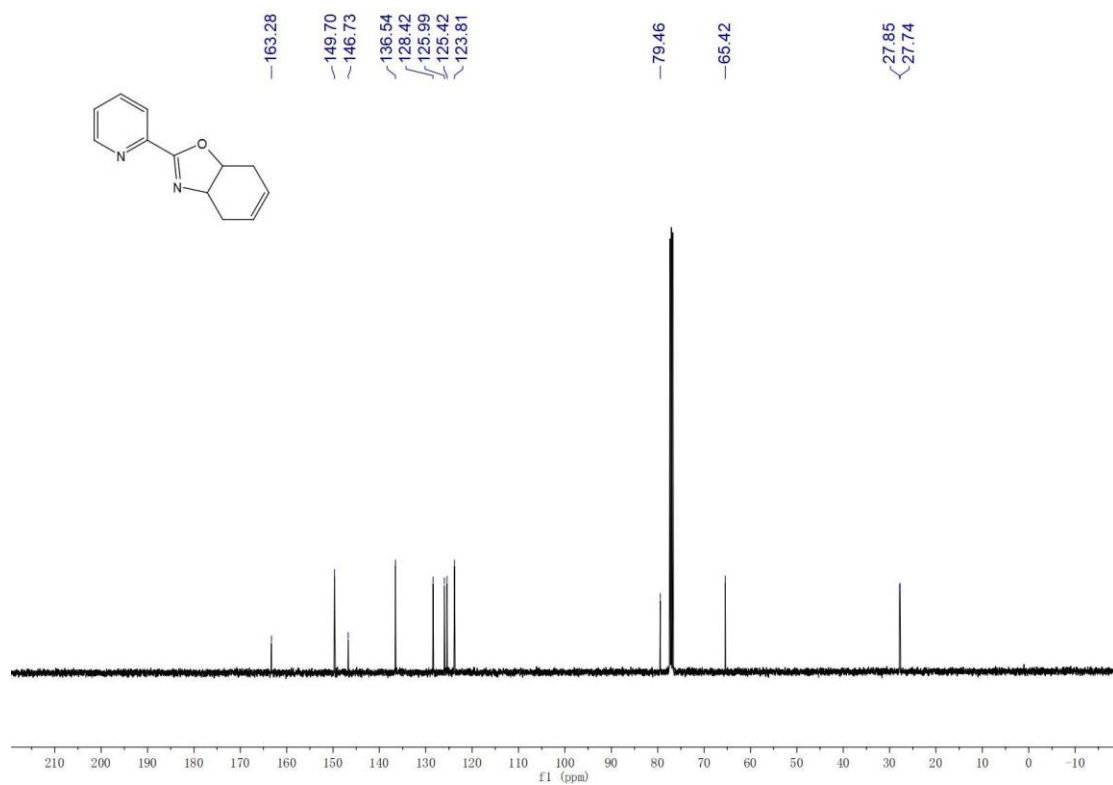

2n

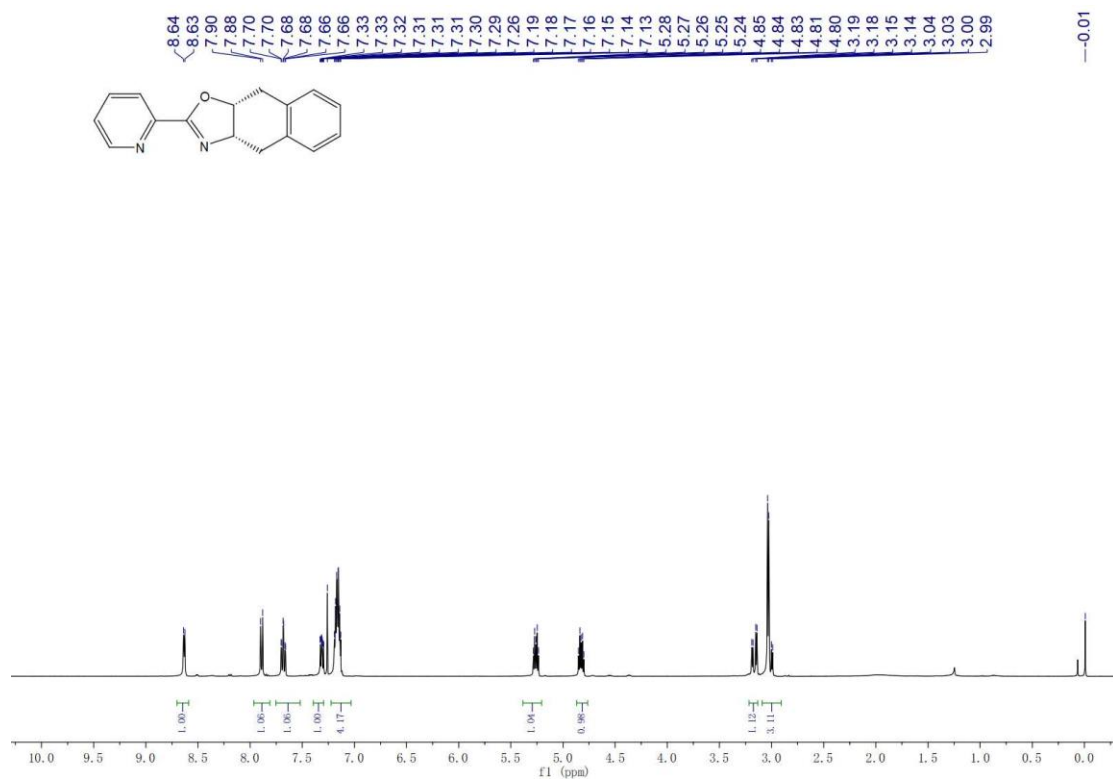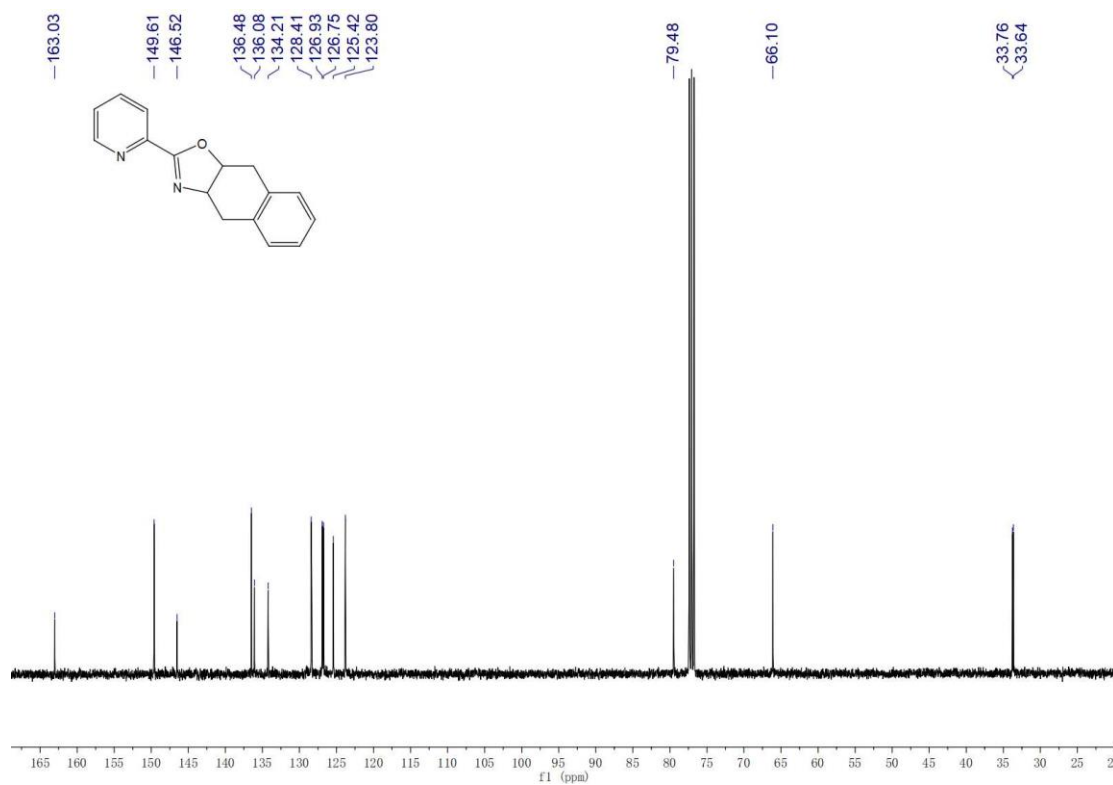

2o

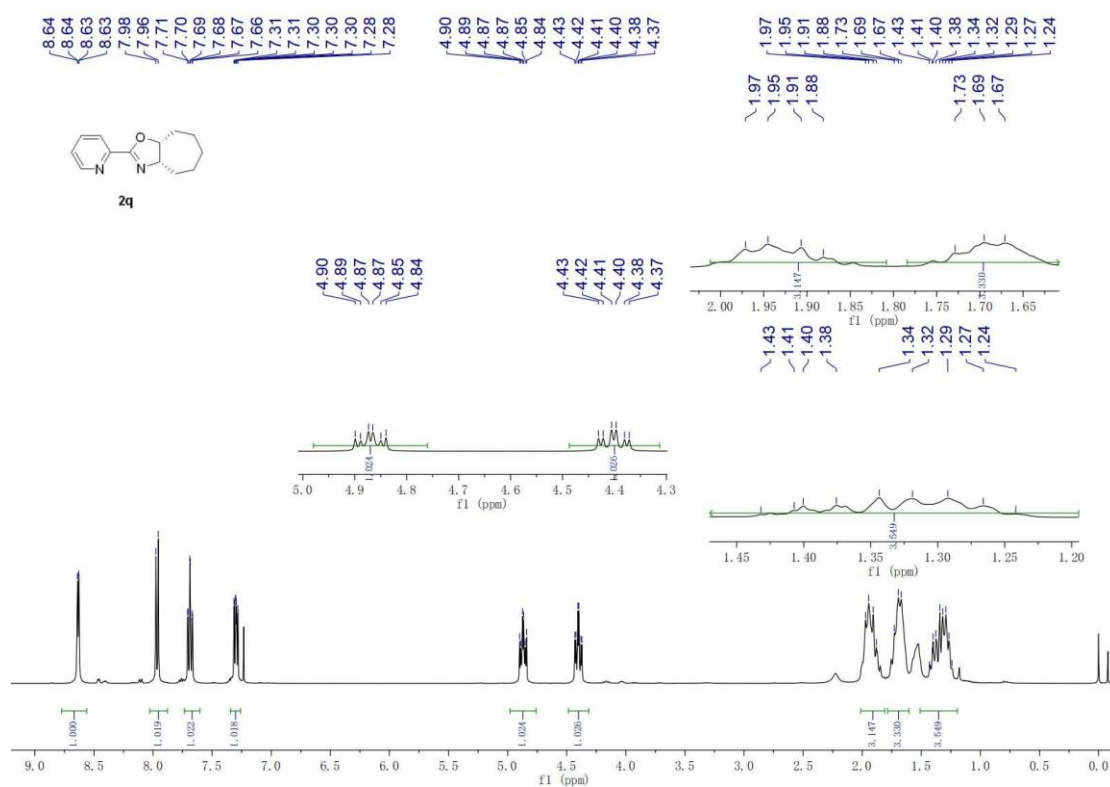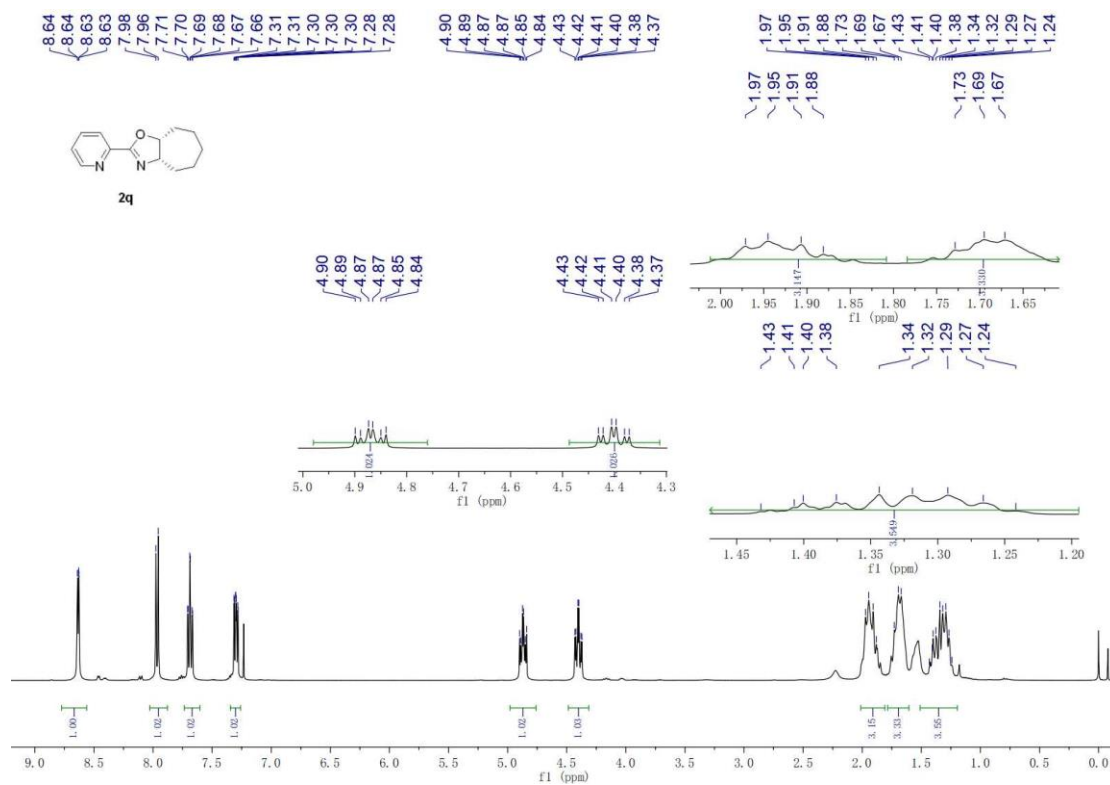

2p

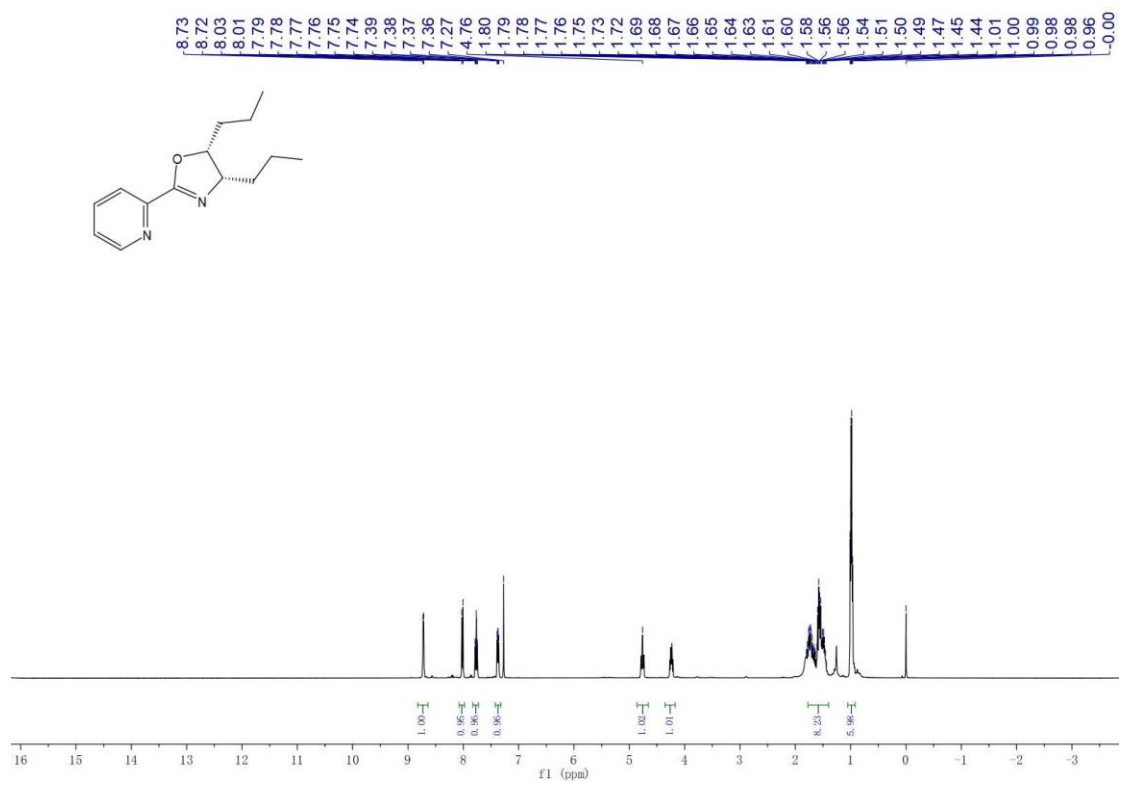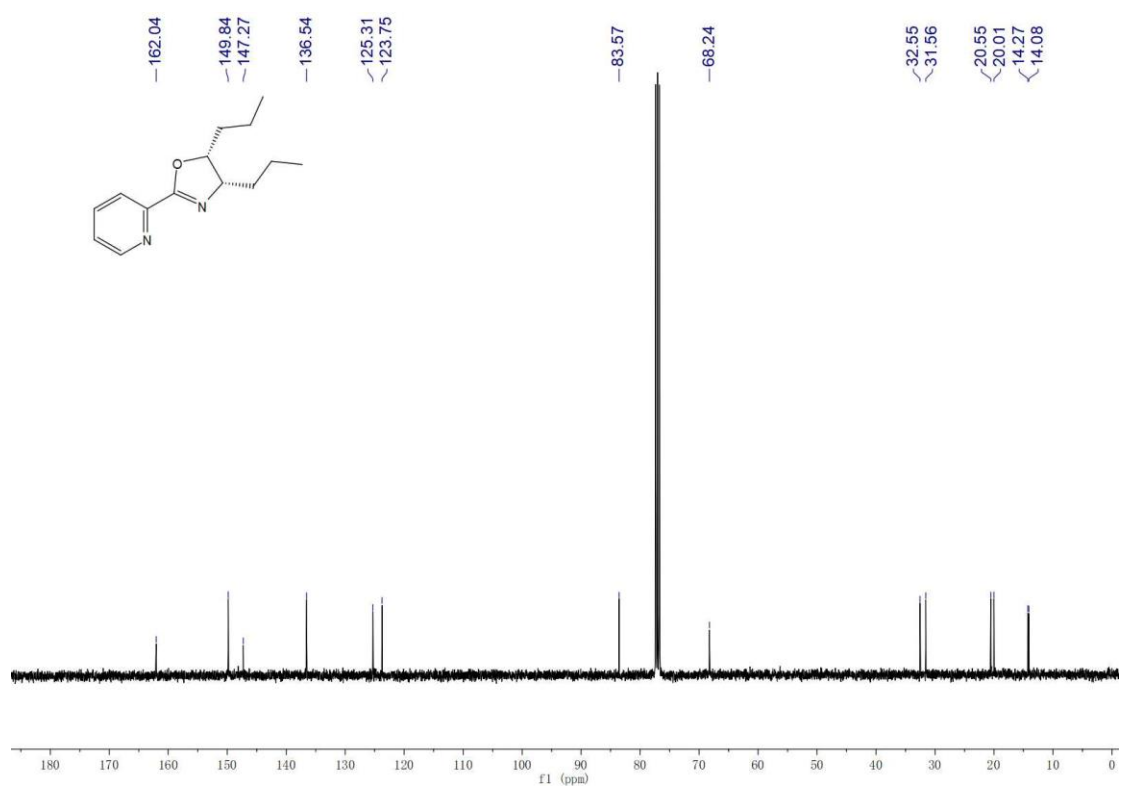

2q

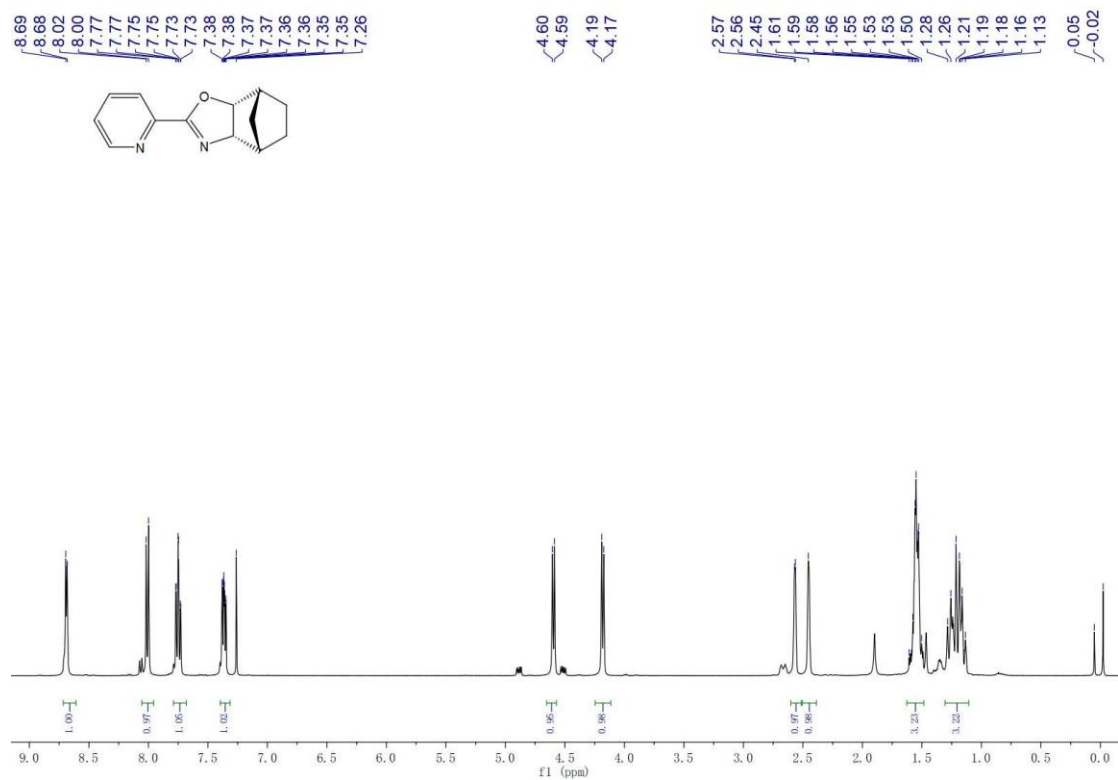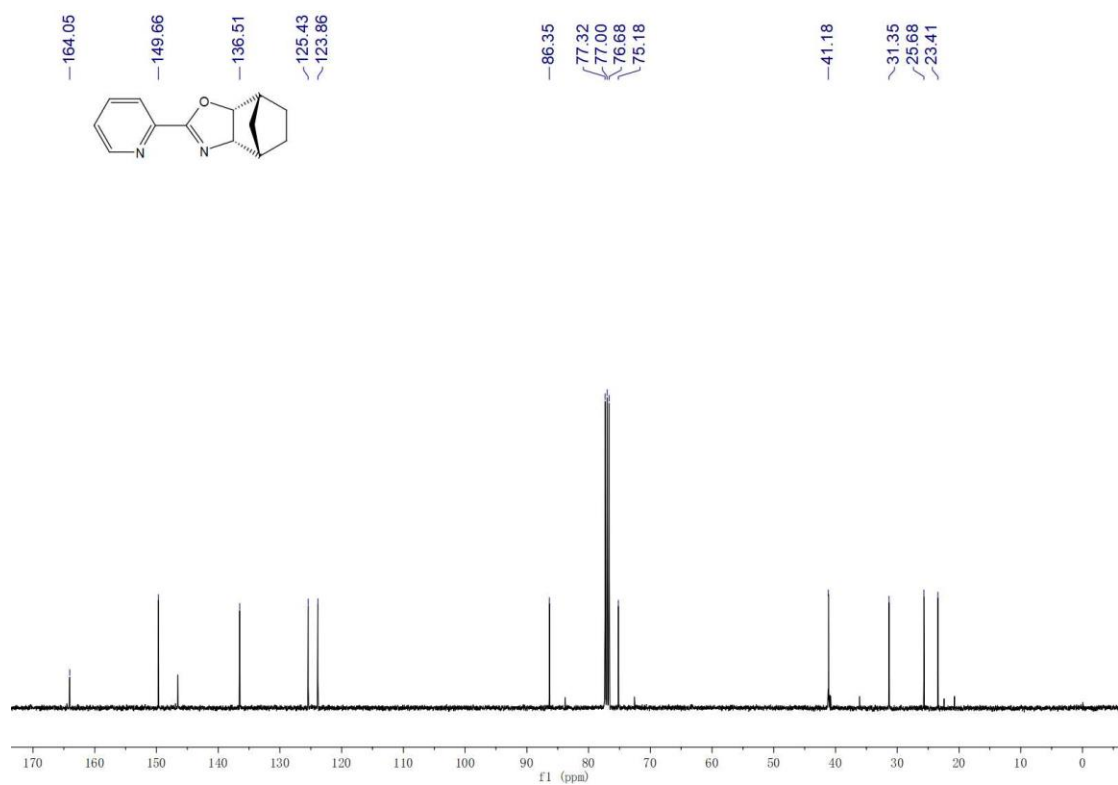



4

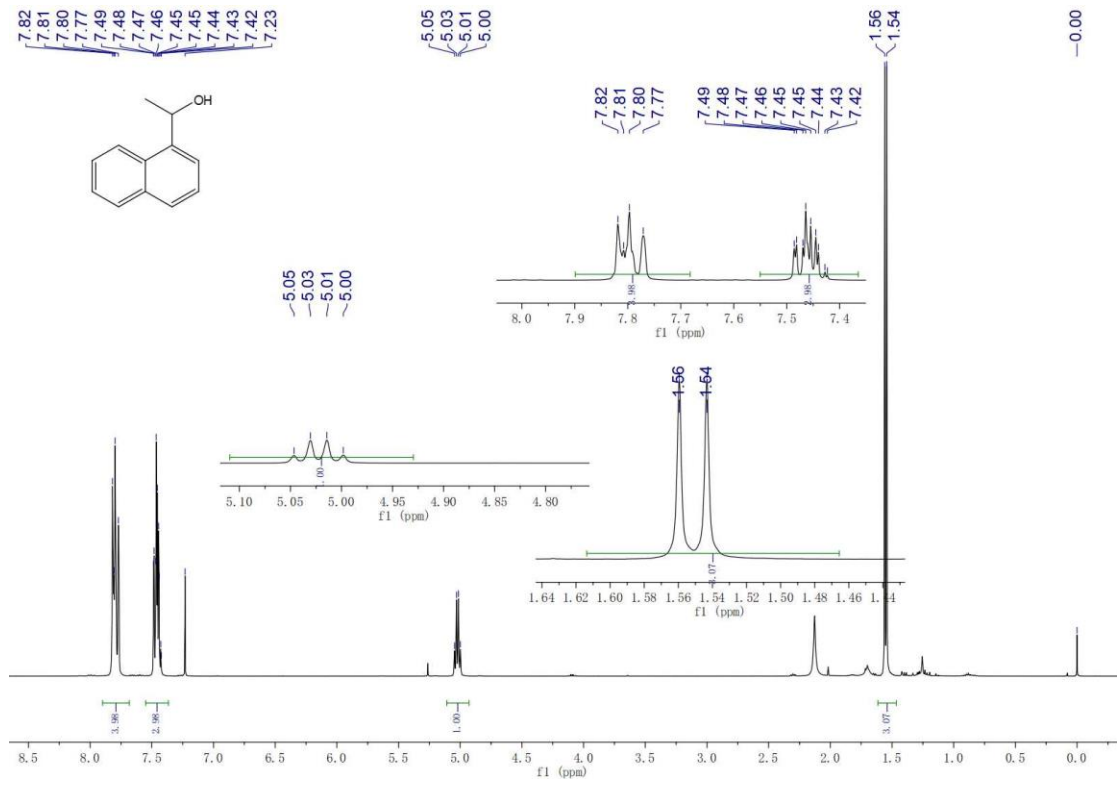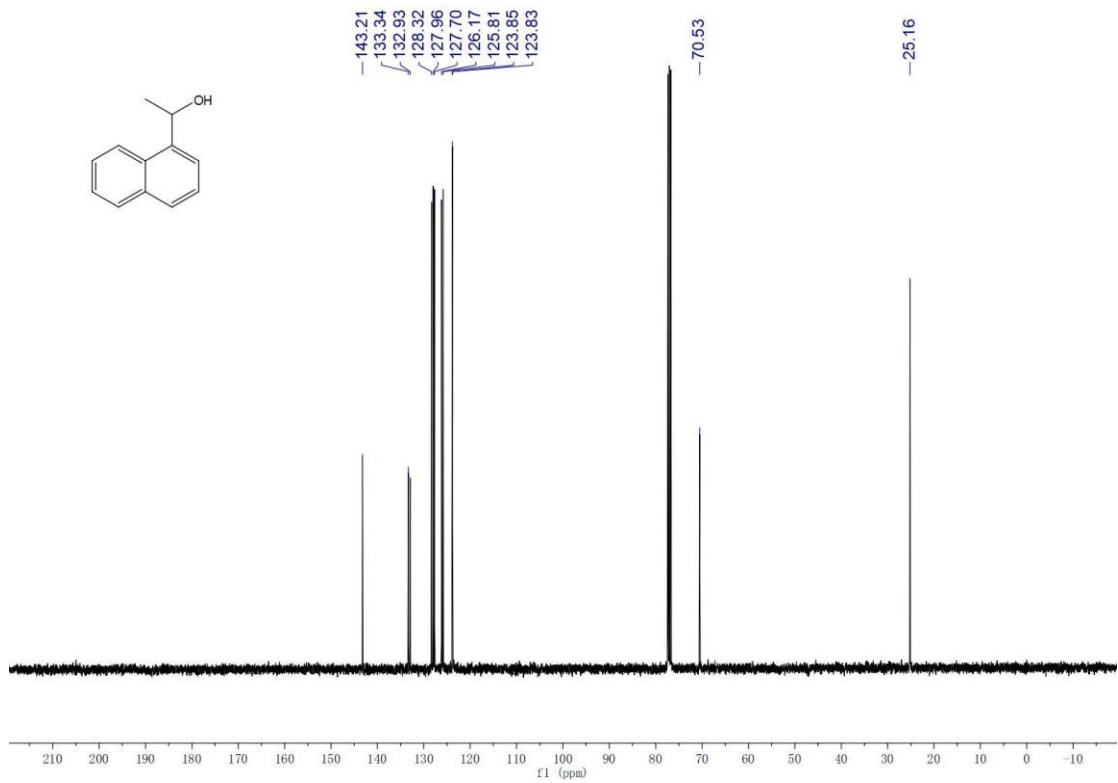

5

7.33  
7.31  
7.29  
7.25  
7.24  
7.21  
7.12

4.96  
4.96  
4.94  
4.89  
4.88  
4.86  
4.83

-2.30

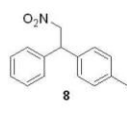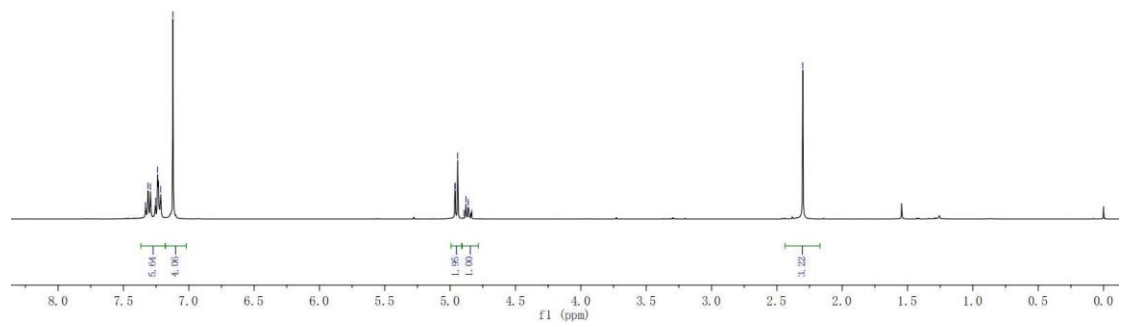

139.45  
137.33  
136.20  
129.72  
129.01  
127.53

-79.36

-48.64

-21.05

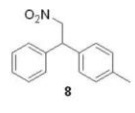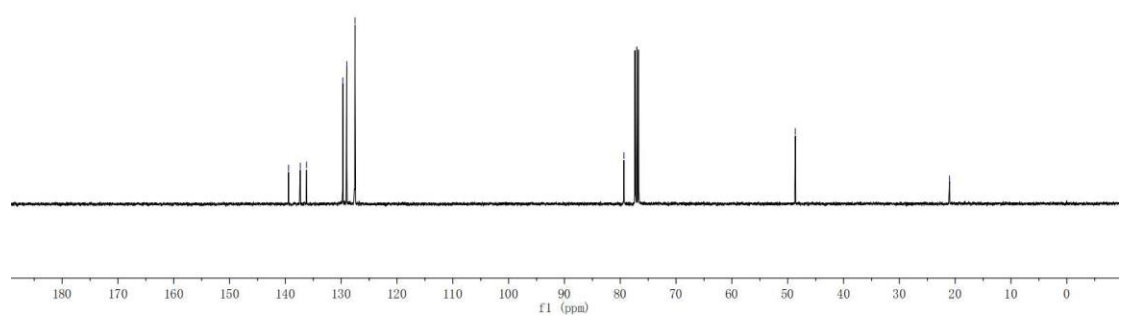

2r'

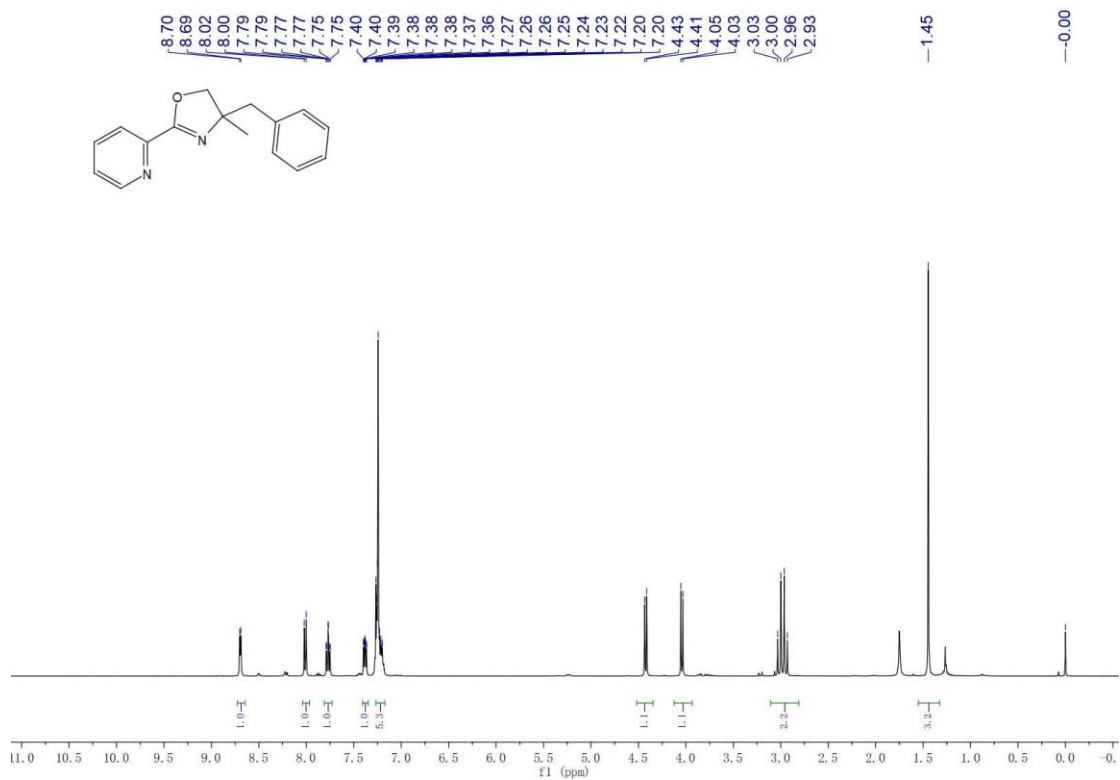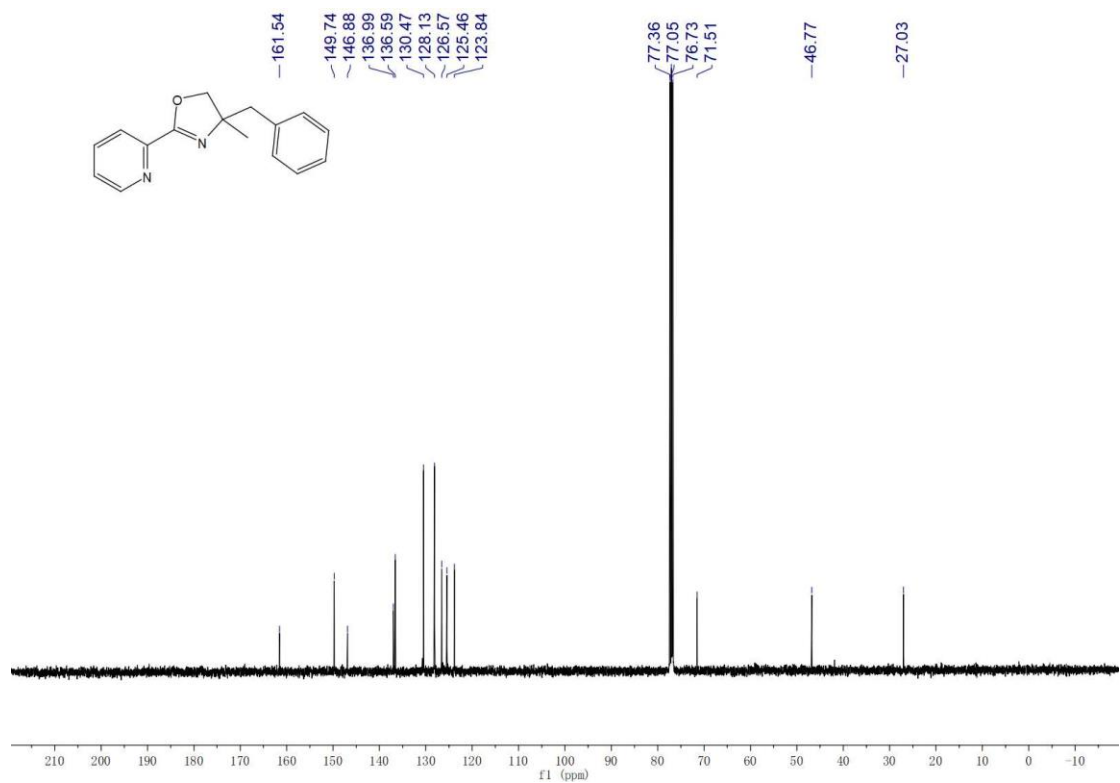

dept 135

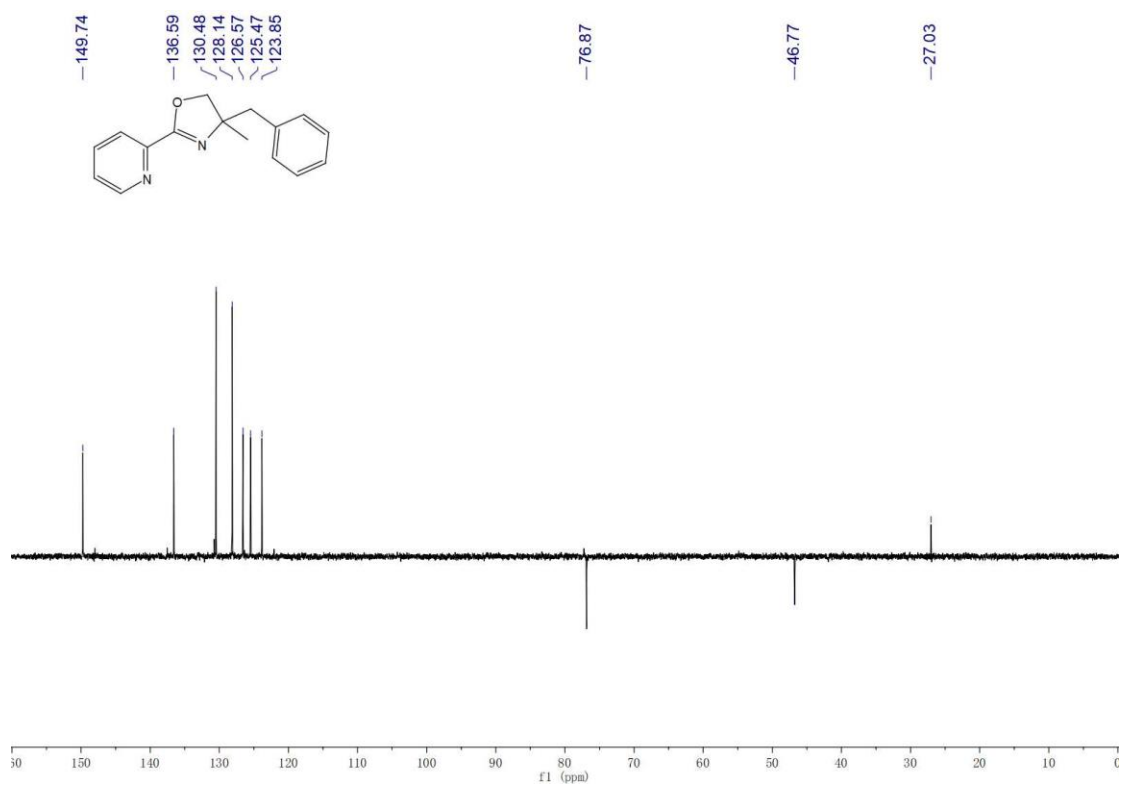

2r

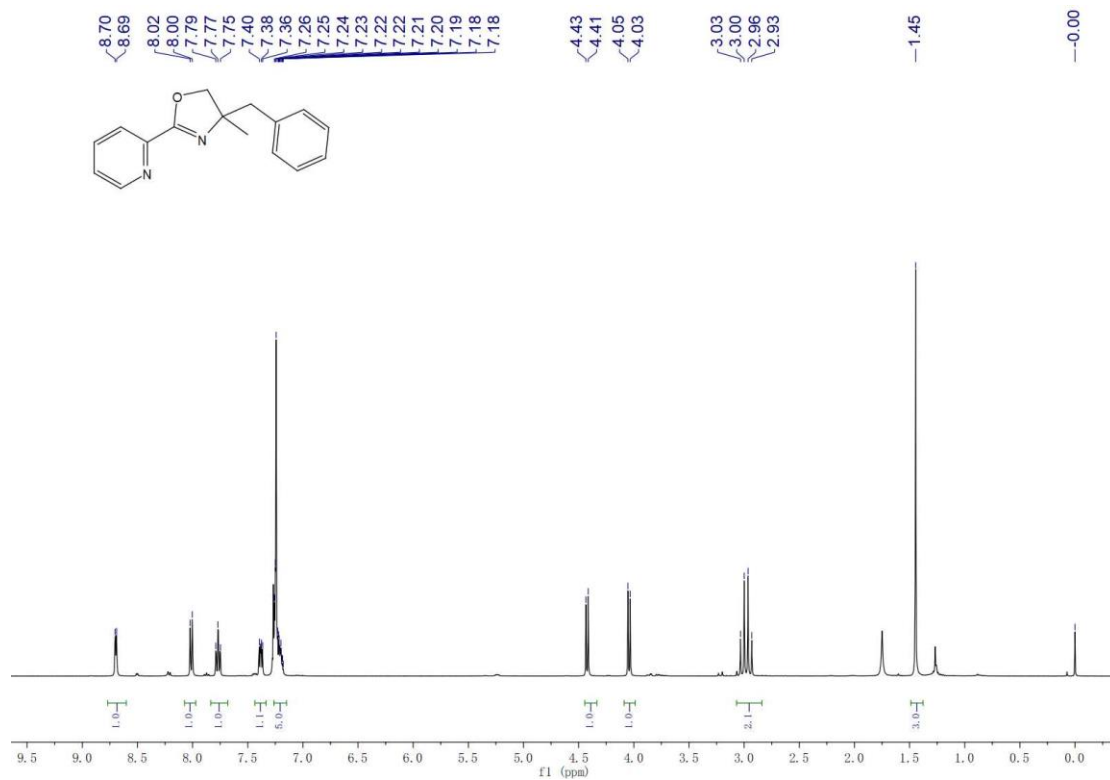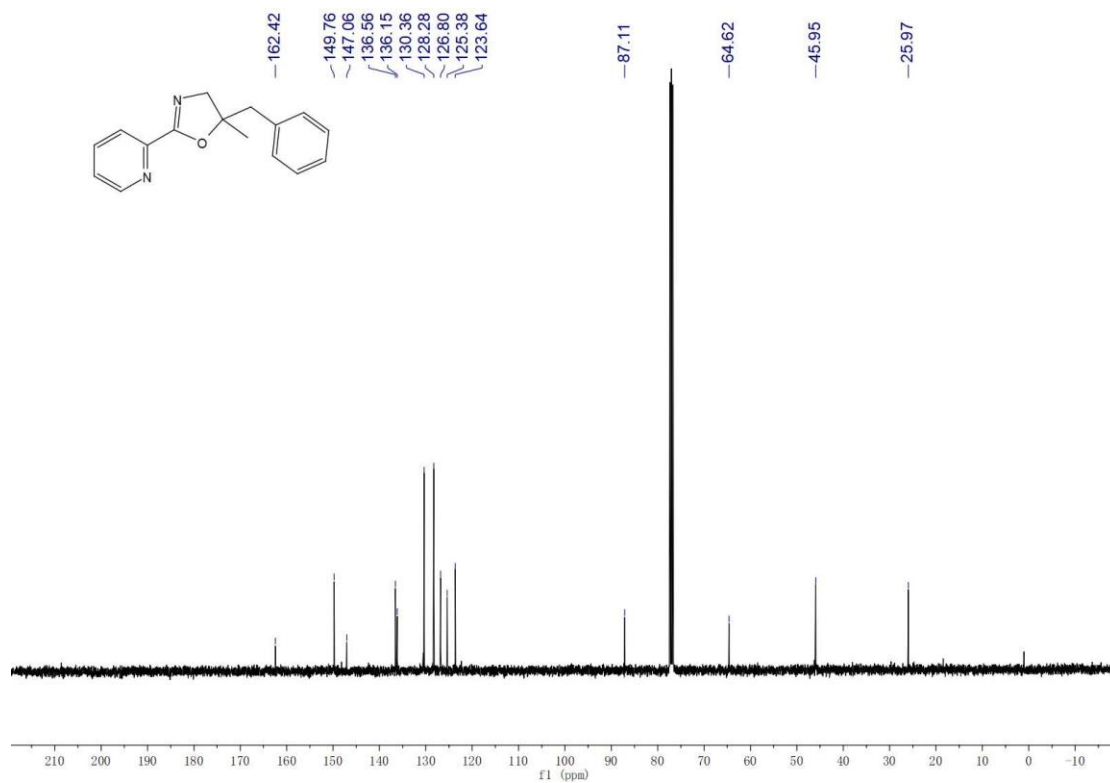

Dept 135

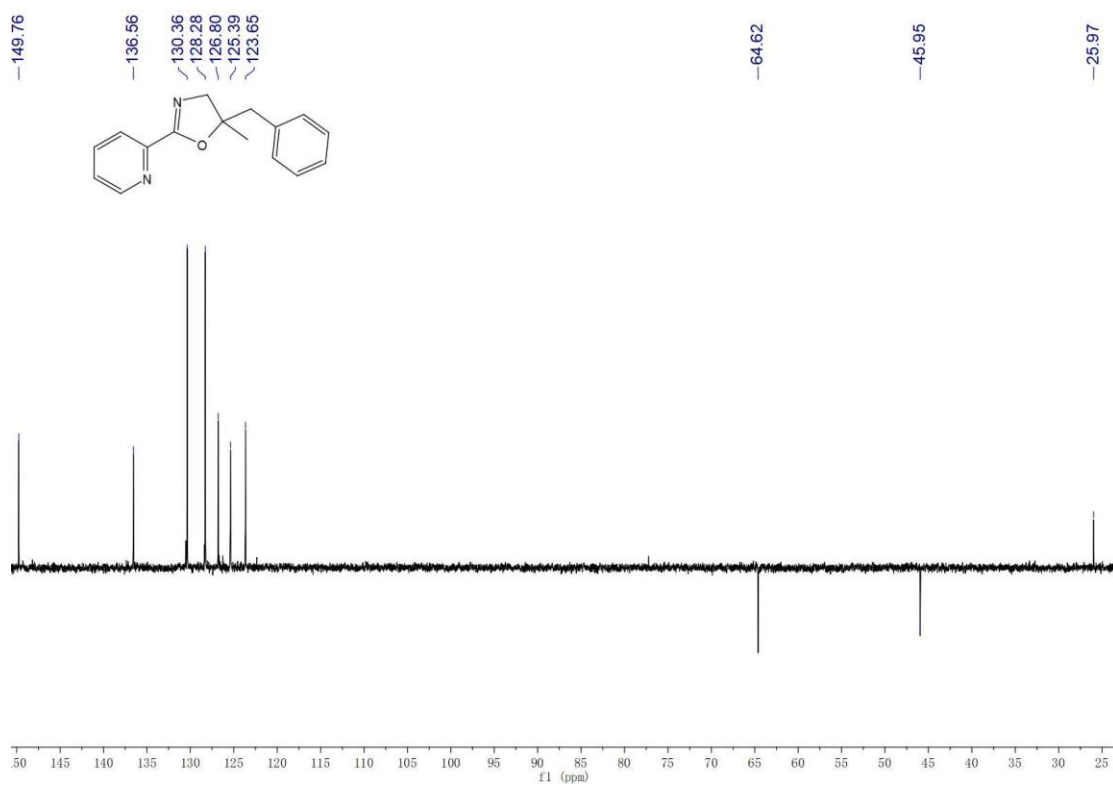

Supplement: d1qo01900g1.pdf [file d1qo01900g1.pdf]
